# Supplementary material for: Theoretical study of the gas-phase ozonolysis of β-pinene (C10H16)
Source: Royal Society of Chemistry journal article supplement (doi:10.1039/b822984h), 2009-01-01
Supplement: b822984h.pdf [file b822984h.pdf]

## Theoretical study of the gas-phase ozonolysis of b-pinene (C<sub>10</sub>H<sub>16</sub>)

### - Supporting Information -

**T. L. Nguyen, L. Vereecken,\* and J. Peeters**

*Department of Chemistry, K.U.Leuven, Celestijnenlaan 200F, B-3001 Leuven, Belgium.*

\* *Email: Luc.Vereecken@chem.kuleuven.be, Fax: +32-16-327992*

---

#### Content:

- p. 2: figures SI-10a and 10b
- p. 3: figures SI-11
- p. 4: figures SI-12
- p. 5: tables SI-1 and SI-2
- p. 6-53: quantum chemical data for the triplet potential energy surface
- p. 54-61 quantum chemical data for the triplet potential energy surface

**Figure SI-10a:** Nascent energy distribution of CI-1 after partitioning of the energy available in the primary ozonide at the moment of decomposition.

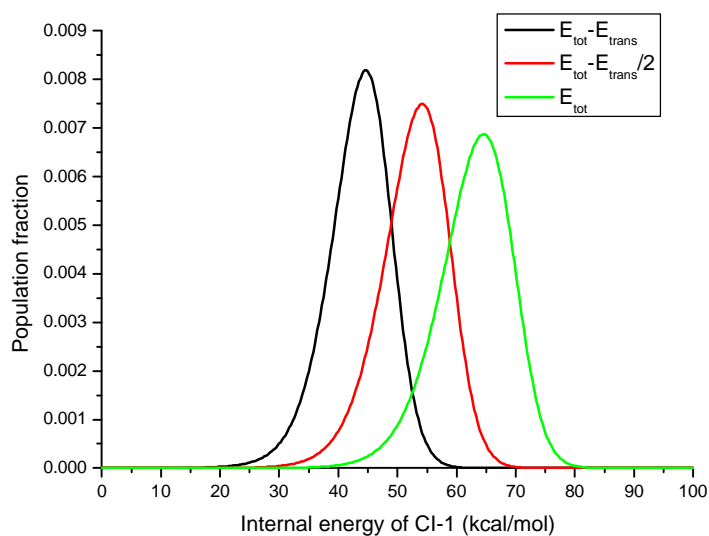

**Figure SI-10b:** Nascent energy distribution of CI-2 after partitioning of the energy available in the primary ozonide at the moment of decomposition.

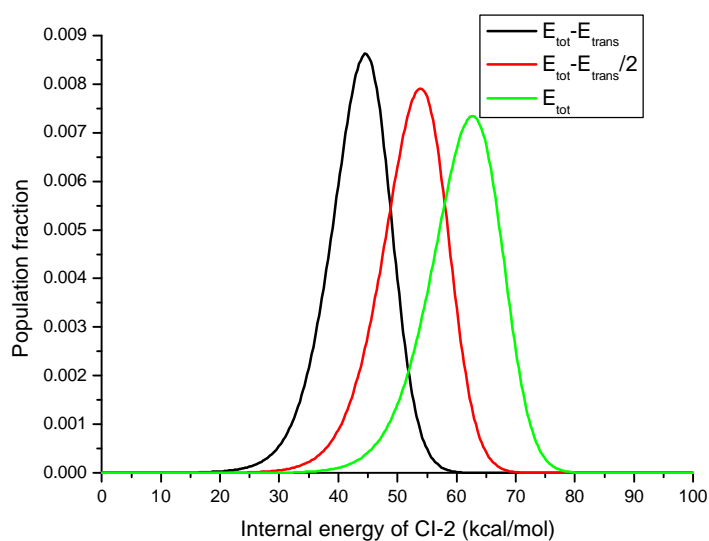

**Figure SI-11:** decomposition of triplet bis(oxy) radicals formed after inter-system crossing from the dioxirane intermediate.

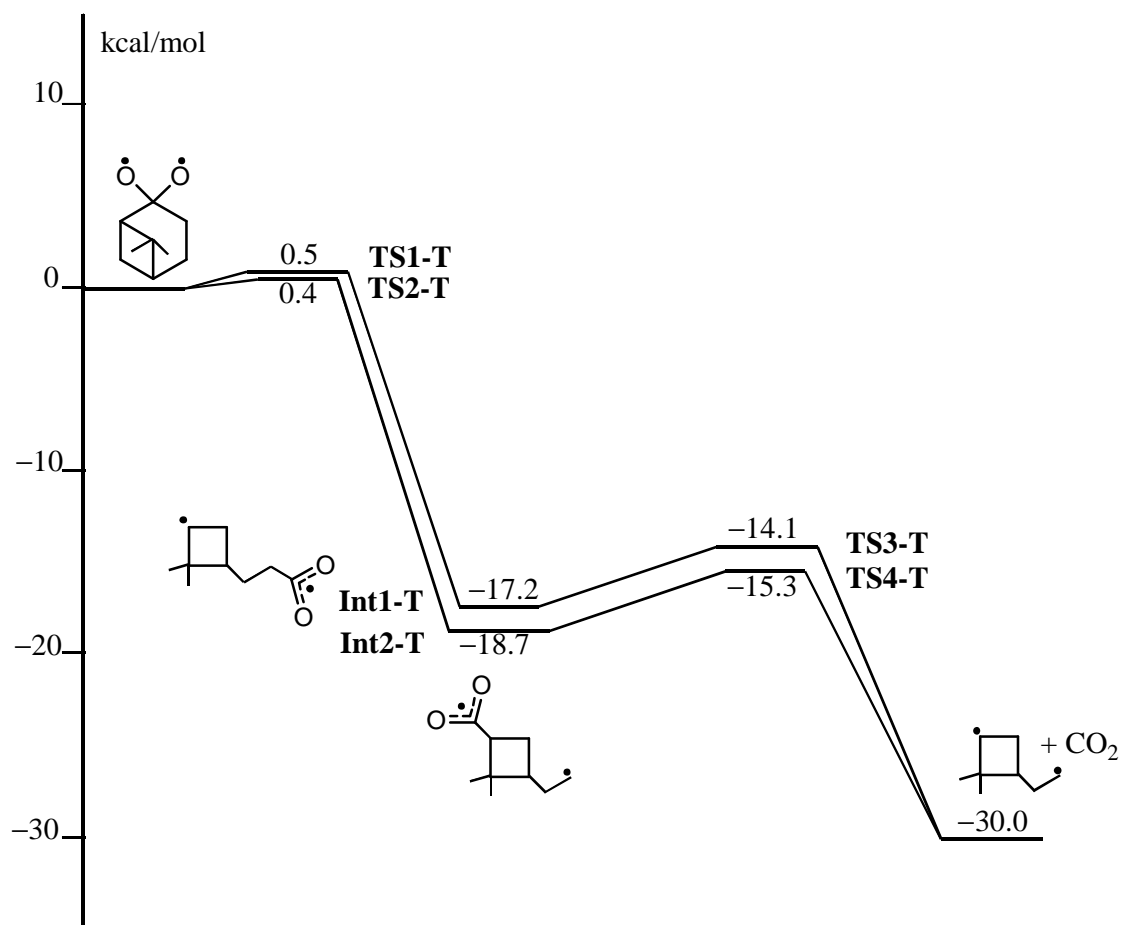

Figure SI-12: Temperature dependent rate coefficients for the formation of the 4 primary ozonides. POZ-1 and POZ-2 correspond to the two envelope conformers of the *anti*-POZ, while POZ-3 and POZ-4 correspond to the conformers of the *syn*-POZ.

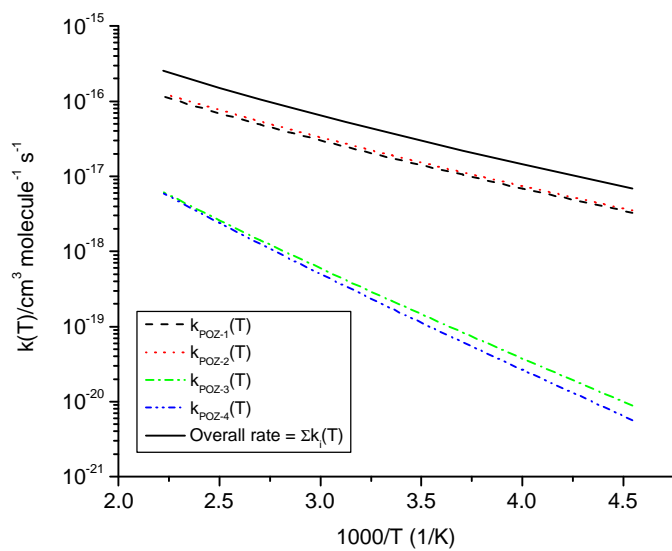

**Table SI-1:** Barrier heights (kcal/mol) for decomposition of the primary ozonide (POZ) in the  $\alpha$ -pinene ozonolysis reaction, calculated at different levels of theory.

| Structure                     | B3LYP <sup>a)</sup> | MPW1B95 <sup>b)</sup> | CBS-QB3 |
|-------------------------------|---------------------|-----------------------|---------|
| POZ                           | 0.0                 | 0.0                   | 0.0     |
| TS1 (POZ $\rightarrow$ CI-1a) | 15.6                | 21.6                  | 16.7    |
| TS2 (POZ $\rightarrow$ CI-1b) | 19.2                | 24.7                  | 20.4    |
| TS3 (POZ $\rightarrow$ CI-2a) | 16.2                | 22.1                  | 17.4    |
| TS4 (POZ $\rightarrow$ CI-2b) | 17.3                | 23.1                  | 17.9    |

a) B3LYP/6-311++G(3df,3pd) // B3LYP/6-311G(d,p)

b) MPW1B95/6-311++G(3df,3pd) // MPW1B95/6-31+G(d,p)

**Table SI-2:** Barrier heights (kcal/mol) for decomposition of the primary ozonide (POZ) in the  $\beta$ -pinene ozonolysis reaction, calculated at different levels of theory.

| Structure                                             | B3LYP <sup>a)</sup> | MPW1B95 <sup>b)</sup> | CBS-QB3 |
|-------------------------------------------------------|---------------------|-----------------------|---------|
| POZ                                                   | 0.0                 | 0.0                   | 0.0     |
| TS1 (POZ $\rightarrow$ HCHO + CI-1)                   | 13.5                | 18.7                  | 14.3    |
| TS2 (POZ $\rightarrow$ HCHO + CI-2)                   | 12.9                | 18.0                  | 13.5    |
| TS3 (POZ $\rightarrow$ H <sub>2</sub> COO + nopinone) | 17.9                | 24.5                  | 19.1    |
| TS4 (POZ $\rightarrow$ H <sub>2</sub> COO + nopinone) | 17.9                | 24.7                  | 19.1    |

a) B3LYP/6-311++G(3df,3pd) // B3LYP/6-311G(d,p)

b) MPW1B95/6-311++G(3df,3pd) // MPW1B95/6-31+G(d,p)

## Stationary points on singlet PES

### b-pinene

-----  
E(RB+HF-LYP/CBSB7) (Hartree): -390.755805894

Electronic state : 1-A

Cartesian coordinates (Angs):

|   |           |           |           |
|---|-----------|-----------|-----------|
| C | 1.076391  | -0.283651 | 0.195405  |
| C | -0.028839 | -0.552164 | -0.904927 |
| C | -1.392652 | -0.530847 | -0.265076 |
| C | -0.504263 | 1.646069  | 0.785574  |
| C | 0.735091  | 1.233313  | -0.024114 |
| C | 0.298960  | 0.864569  | -1.470155 |
| C | 2.482518  | -0.638288 | -0.308766 |
| C | 0.886653  | -0.899749 | 1.581163  |
| H | 0.109283  | -1.423924 | -1.549236 |
| H | -0.715108 | 2.706245  | 0.613798  |
| H | -0.296689 | 1.543220  | 1.854496  |
| H | 1.554140  | 1.947068  | 0.104969  |
| H | -0.521381 | 1.432211  | -1.914315 |
| H | 1.128599  | 0.847925  | -2.174927 |
| H | 2.698739  | -0.235057 | -1.299620 |
| H | 2.608728  | -1.724722 | -0.357767 |
| H | 3.240390  | -0.248201 | 0.378819  |
| H | 1.037249  | -1.983173 | 1.535918  |
| H | -0.107534 | -0.731647 | 1.994764  |
| H | 1.621049  | -0.493502 | 2.285236  |
| C | -1.748553 | 0.802974  | 0.382515  |
| H | -2.331644 | 1.374842  | -0.347558 |
| H | -2.411777 | 0.646919  | 1.236837  |
| C | -2.217685 | -1.577436 | -0.272303 |
| H | -1.955614 | -2.500721 | -0.778253 |
| H | -3.184159 | -1.546231 | 0.220941  |

Rotational constants (GHz): 1.8990400 1.2814300 1.1415800

Vibrational harmonic frequencies (cm-1):

|           |           |           |
|-----------|-----------|-----------|
| 110.9946  | 167.6246  | 186.8931  |
| 209.3300  | 228.5696  | 298.0401  |
| 358.2761  | 383.5765  | 392.8894  |
| 421.6608  | 451.7118  | 478.3689  |
| 531.9950  | 612.8603  | 643.4610  |
| 731.6827  | 772.4174  | 796.1268  |
| 828.8116  | 859.4843  | 888.0075  |
| 905.2204  | 915.0215  | 934.2963  |
| 948.6117  | 966.9923  | 988.0876  |
| 1006.3643 | 1027.1191 | 1060.8236 |
| 1076.5130 | 1099.3247 | 1128.5823 |
| 1165.8117 | 1209.2385 | 1219.8837 |
| 1227.0274 | 1237.5768 | 1260.2395 |
| 1284.5736 | 1286.3258 | 1311.2148 |
| 1322.0152 | 1344.8248 | 1368.3206 |
| 1403.3850 | 1422.5598 | 1450.4988 |
| 1480.2338 | 1486.1271 | 1486.8406 |
| 1502.8051 | 1506.3032 | 1516.5979 |
| 1525.6685 | 1706.1061 | 3016.0651 |
| 3020.2862 | 3022.1462 | 3030.7096 |
| 3045.7992 | 3057.3973 | 3058.4071 |
| 3065.9635 | 3068.2234 | 3074.8242 |
| 3076.0476 | 3100.7684 | 3117.9143 |
| 3122.7049 | 3123.6969 | 3201.3874 |

Zero-point correction (Hartree): 0.235417

O3: UB3LYP/6-311G(d,p)

-----  
E(UB+HF-LYP/6-311G(d,p)) (Hartree): -225.473809652

Point group : C2V  
Cartesian coordinates (Angs):  
O 0.000000 1.088099 -0.225319  
O 0.000000 0.000000 0.450637  
O 0.000000 -1.088099 -0.225319  
Rotational constants (GHz): 103.7265200 13.3434700 11.8226000  
Vibrational harmonic frequencies (cm-1):  
709.9044 1020.3796 1048.2558  
Zero-point correction (Hartree): 0.006330

O3: UMPW1B95/6-31+G(d,p)

-----  
E(UmPW+HF-B95/6-31+G(d,p)) (Hartree): -225.345928869  
Point group : C2V  
Cartesian coordinates (Angs):  
O 0.000000 1.075328 -0.223535  
O 0.000000 0.000000 0.447070  
O 0.000000 -1.075328 -0.223535  
Rotational constants (GHz): 105.3884400 13.6622900 12.0944000  
Vibrational harmonic frequencies (cm-1):  
725.1136 1094.2254 1193.9475  
Zero-point correction (Hartree): 0.006865

POZ-1

-----  
E(RB+HF-LYP/6-311G(d,p)) (Hartree): -616.316395885  
Electronic state : 1-A  
Cartesian coordinates (Angs):  
C 1.601227 -0.614012 -0.007227  
C 0.296610 -0.270488 -0.822292  
C -0.830252 0.252951 0.075487  
C 1.166002 1.702092 0.977539  
C 1.908239 0.919738 -0.113022  
C 1.061821 0.943697 -1.415257  
C 2.572343 -1.459694 -0.845125  
C 1.515683 -1.241806 1.387629  
H -0.095445 -1.029592 -1.503475  
H 1.370248 2.769813 0.855233  
H 1.556241 1.428289 1.961751  
H 2.961084 1.210827 -0.167051  
H 0.478331 1.840990 -1.627617  
H 1.633513 0.684879 -2.304416  
H 2.719131 -1.070282 -1.853555  
H 2.203839 -2.486344 -0.937722  
H 3.553095 -1.502143 -0.360578  
H 1.196995 -2.286945 1.328375  
H 0.835755 -0.724781 2.065805  
H 2.505017 -1.233053 1.856992  
C -0.373516 1.478783 0.912747  
H -0.839393 2.345621 0.440644  
H -0.802408 1.424864 1.915558  
C -1.559278 -0.900259 0.847587  
H -1.570916 -0.757132 1.927810  
H -1.127798 -1.871974 0.593389  
O -2.916423 -0.835140 0.422130  
O -2.761799 -0.377839 -0.940743  
O -1.913100 0.761847 -0.753830  
Rotational constants (GHz): 1.3796900 0.6490900 0.6082300  
Vibrational harmonic frequencies (cm-1):  
67.9725 100.7924 150.0194  
208.9750 214.3521 228.7527  
270.7521 308.2792 325.0215  
362.3098 381.2008 400.2627  
408.8693 427.0253 467.7375  
519.4986 568.6358 634.1672  
694.0188 705.4092 739.5640  
785.7631 795.4753 828.0876

|           |           |           |
|-----------|-----------|-----------|
| 859.4422  | 885.5855  | 917.5046  |
| 921.9674  | 928.2603  | 950.3128  |
| 960.2188  | 965.5616  | 988.7308  |
| 1003.9298 | 1022.6274 | 1032.8824 |
| 1041.5981 | 1061.2137 | 1102.8053 |
| 1124.1888 | 1145.5418 | 1178.1515 |
| 1210.0090 | 1219.1377 | 1232.6276 |
| 1239.5164 | 1255.6403 | 1271.8049 |
| 1282.0461 | 1297.9389 | 1320.6697 |
| 1335.8998 | 1357.1489 | 1366.5828 |
| 1376.2652 | 1407.2232 | 1426.7592 |
| 1486.5699 | 1489.9318 | 1494.1091 |
| 1504.2630 | 1509.8614 | 1510.9475 |
| 1520.7569 | 1527.7158 | 3019.9402 |
| 3025.8625 | 3033.1340 | 3045.2614 |
| 3049.9524 | 3059.1475 | 3061.8567 |
| 3064.0882 | 3072.4141 | 3074.3625 |
| 3078.5674 | 3094.7554 | 3105.0816 |
| 3107.3811 | 3124.2887 | 3126.8139 |

Zero-point correction (Hartree): 0.249391

**POZ-2**

-----  
 E(RB+HF-LYP/6-311G(d,p)) (Hartree): -616.315585243  
 Electronic state : 1-A  
 Cartesian coordinates (Angs):

|   |           |           |           |
|---|-----------|-----------|-----------|
| C | 1.678054  | -0.542736 | -0.014080 |
| C | 0.349006  | -0.306447 | -0.821120 |
| C | -0.821249 | 0.119914  | 0.069851  |
| C | 1.041545  | 1.738606  | 0.984872  |
| C | 1.848460  | 1.014561  | -0.100390 |
| C | 1.001594  | 0.981136  | -1.399505 |
| C | 2.715443  | -1.280966 | -0.875399 |
| C | 1.650652  | -1.217684 | 1.360886  |
| H | 0.019226  | -1.083762 | -1.514552 |
| H | 1.010602  | 2.803246  | 0.735016  |
| H | 1.556438  | 1.664110  | 1.947339  |
| H | 2.870572  | 1.399846  | -0.156043 |
| H | 0.339805  | 1.827286  | -1.589188 |
| H | 1.586842  | 0.788311  | -2.296824 |
| H | 2.811456  | -0.866148 | -1.879579 |
| H | 2.446009  | -2.336991 | -0.977812 |
| H | 3.701256  | -1.234721 | -0.402027 |
| H | 1.403521  | -2.280182 | 1.265573  |
| H | 0.943427  | -0.773866 | 2.060983  |
| H | 2.641629  | -1.160573 | 1.822766  |
| C | -0.410053 | 1.185468  | 1.126355  |
| H | -1.139600 | 1.993361  | 1.051267  |
| H | -0.535819 | 0.764034  | 2.125728  |
| C | -1.621726 | -1.074226 | 0.686039  |
| H | -1.884120 | -0.876376 | 1.729583  |
| H | -1.099126 | -2.026376 | 0.595032  |
| O | -2.793246 | -1.176502 | -0.108832 |
| O | -3.066611 | 0.217748  | -0.355379 |
| O | -1.797951 | 0.670384  | -0.863577 |

Rotational constants (GHz): 1.4329200 0.6352800 0.5918400  
 Vibrational harmonic frequencies (cm-1):

|          |          |          |
|----------|----------|----------|
| 57.9317  | 71.1989  | 158.8134 |
| 180.5856 | 191.1711 | 215.7738 |
| 256.2538 | 277.5492 | 301.7101 |
| 367.6452 | 382.8000 | 393.5133 |
| 414.8757 | 430.8687 | 481.6013 |
| 506.2291 | 570.2549 | 630.8715 |
| 700.2967 | 707.3793 | 742.6356 |
| 782.8069 | 790.5651 | 824.5520 |
| 861.7228 | 878.6661 | 912.7189 |
| 920.8584 | 924.8673 | 947.2840 |
| 953.2955 | 964.7421 | 997.4528 |



|           |           |           |
|-----------|-----------|-----------|
| 1008.0076 | 1021.9767 | 1034.2354 |
| 1038.3436 | 1064.3969 | 1114.3120 |
| 1133.5170 | 1147.7282 | 1178.0396 |
| 1209.5221 | 1217.6092 | 1234.3355 |
| 1241.1886 | 1257.6362 | 1265.9448 |
| 1281.1158 | 1294.6441 | 1311.9889 |
| 1337.2015 | 1354.7595 | 1372.2150 |
| 1377.4172 | 1404.7747 | 1424.4848 |
| 1483.1552 | 1487.5830 | 1491.7395 |
| 1498.7730 | 1507.7387 | 1510.4576 |
| 1518.9883 | 1526.8473 | 3020.0224 |
| 3025.9515 | 3029.3738 | 3035.6722 |
| 3049.0508 | 3054.3990 | 3061.9577 |
| 3064.1815 | 3069.8321 | 3077.0310 |
| 3077.8177 | 3096.9802 | 3106.5882 |
| 3123.4747 | 3124.8630 | 3129.2738 |

Zero-point correction (Hartree): 0.248996

**POZ-3**

-----

E(RB+HF-LYP/6-311G(d,p)) (Hartree): -616.316114749

Electronic state : 1-A

Cartesian coordinates (Angs):

|   |           |           |           |
|---|-----------|-----------|-----------|
| C | 1.612157  | -0.581842 | -0.001267 |
| C | 0.287343  | -0.312338 | -0.797199 |
| C | -0.839032 | 0.258851  | 0.068087  |
| C | 1.157085  | 1.784896  | 0.863474  |
| C | 1.885513  | 0.949933  | -0.194999 |
| C | 1.007376  | 0.892572  | -1.473748 |
| C | 2.578006  | -1.445502 | -0.828809 |
| C | 1.561156  | -1.159495 | 1.415048  |
| H | -0.095165 | -1.122833 | -1.422226 |
| H | 1.231973  | 2.840671  | 0.584920  |
| H | 1.663252  | 1.684862  | 1.827412  |
| H | 2.927839  | 1.264408  | -0.298800 |
| H | 0.409058  | 1.779725  | -1.701804 |
| H | 1.556462  | 0.610442  | -2.369944 |
| H | 2.686223  | -1.106053 | -1.860515 |
| H | 2.230870  | -2.483049 | -0.856242 |
| H | 3.573355  | -1.441125 | -0.373475 |
| H | 1.202868  | -2.192215 | 1.391881  |
| H | 0.909471  | -0.612388 | 2.093742  |
| H | 2.566923  | -1.165995 | 1.849094  |
| C | -0.344706 | 1.390685  | 1.014939  |
| H | -0.974101 | 2.271038  | 0.875300  |
| H | -0.542246 | 1.050908  | 2.032328  |
| C | -2.068692 | 0.639102  | -0.834403 |
| H | -2.375741 | 1.679298  | -0.728070 |
| H | -1.865529 | 0.404058  | -1.883646 |
| O | -3.146526 | -0.148433 | -0.343266 |
| O | -2.449846 | -1.334858 | 0.103906  |
| O | -1.418971 | -0.762074 | 0.921022  |

Rotational constants (GHz): 1.3892700 0.6574500 0.6061300

Vibrational harmonic frequencies (cm-1):

|           |           |           |
|-----------|-----------|-----------|
| 44.3066   | 79.1980   | 147.7200  |
| 172.3653  | 196.3518  | 214.9106  |
| 255.4522  | 278.2730  | 297.8255  |
| 361.4867  | 383.6953  | 391.3642  |
| 414.3495  | 429.4186  | 457.7618  |
| 523.0302  | 569.0327  | 641.8183  |
| 696.7981  | 707.5756  | 736.0638  |
| 782.9089  | 797.3233  | 826.8046  |
| 860.4033  | 876.4321  | 915.8905  |
| 919.6605  | 921.9341  | 948.4157  |
| 957.0226  | 966.5976  | 997.4978  |
| 1001.9924 | 1019.5705 | 1025.7403 |
| 1050.6234 | 1076.4315 | 1091.1765 |

|           |           |           |
|-----------|-----------|-----------|
| 1119.9582 | 1146.8906 | 1186.9480 |
| 1206.9300 | 1220.8832 | 1230.6563 |
| 1240.6238 | 1257.2138 | 1272.7824 |
| 1282.0418 | 1291.8516 | 1313.2270 |
| 1339.2479 | 1354.0345 | 1368.3358 |
| 1378.4241 | 1407.1665 | 1428.0930 |
| 1484.6066 | 1486.0653 | 1495.6923 |
| 1503.9054 | 1505.6508 | 1510.6487 |
| 1514.5486 | 1521.8643 | 3021.4079 |
| 3027.6163 | 3029.2908 | 3034.3235 |
| 3040.5083 | 3050.6854 | 3061.9397 |
| 3063.7633 | 3066.6358 | 3076.6357 |
| 3084.3214 | 3098.7589 | 3100.4764 |
| 3119.9074 | 3122.2032 | 3133.6042 |

Zero-point correction (Hartree): 0.248857

#### POZ-4

-----

E(RB+HF-LYP/6-311G(d,p)) (Hartree): -616.317131209

Electronic state : 1-A

Cartesian coordinates (Angs):

|   |           |           |           |
|---|-----------|-----------|-----------|
| C | -1.612511 | -0.597719 | 0.019543  |
| C | -0.352703 | -0.208127 | 0.877752  |
| C | 0.831869  | 0.261577  | 0.025168  |
| C | -1.083790 | 1.627307  | -1.120177 |
| C | -1.902941 | 0.943054  | -0.014650 |
| C | -1.139510 | 1.057393  | 1.335270  |
| C | -2.639496 | -1.359175 | 0.873887  |
| C | -1.456149 | -1.349493 | -1.303887 |
| H | -0.012698 | -0.930845 | 1.623812  |
| H | -1.318556 | 2.696056  | -1.139456 |
| H | -1.377528 | 1.231669  | -2.095355 |
| H | -2.952037 | 1.250368  | -0.043202 |
| H | -0.572613 | 1.973362  | 1.519651  |
| H | -1.768815 | 0.866057  | 2.201766  |
| H | -2.835802 | -0.890754 | 1.839924  |
| H | -2.291367 | -2.379059 | 1.064335  |
| H | -3.593186 | -1.429281 | 0.341305  |
| H | -1.129160 | -2.376642 | -1.122272 |
| H | -0.731981 | -0.902067 | -1.981884 |
| H | -2.422635 | -1.392943 | -1.818376 |
| C | 0.443345  | 1.455509  | -0.886771 |
| H | 0.823043  | 2.369092  | -0.420620 |
| H | 0.986921  | 1.350088  | -1.828030 |
| C | 2.090526  | 0.594350  | 0.892099  |
| H | 2.601305  | 1.485068  | 0.514241  |
| H | 1.856731  | 0.702306  | 1.951742  |
| O | 2.924647  | -0.543567 | 0.763242  |
| O | 2.738416  | -0.836679 | -0.632518 |
| O | 1.295255  | -0.891071 | -0.730347 |

Rotational constants (GHz): 1.3986900 0.6495400 0.6093000

Vibrational harmonic frequencies (cm-1):

|           |           |           |
|-----------|-----------|-----------|
| 61.3525   | 104.2118  | 147.6878  |
| 194.3082  | 212.2122  | 220.7976  |
| 268.3765  | 306.9885  | 324.1575  |
| 359.0436  | 383.1220  | 395.2670  |
| 427.6357  | 433.7962  | 482.1030  |
| 491.8277  | 562.5394  | 637.1266  |
| 694.7660  | 707.2070  | 728.3988  |
| 779.1236  | 788.5459  | 827.2328  |
| 858.7738  | 883.5665  | 903.8357  |
| 915.5961  | 929.0095  | 953.7572  |
| 966.4813  | 967.7543  | 983.5770  |
| 1014.6409 | 1022.9703 | 1028.8314 |
| 1053.5185 | 1064.6195 | 1098.0814 |
| 1119.5523 | 1141.3259 | 1191.8210 |
| 1208.4243 | 1222.4655 | 1230.9719 |

|           |           |           |
|-----------|-----------|-----------|
| 1239.8851 | 1248.3074 | 1264.5961 |
| 1276.0899 | 1297.9708 | 1321.6636 |
| 1337.2995 | 1357.5558 | 1371.6182 |
| 1379.2889 | 1406.6422 | 1426.5546 |
| 1481.3408 | 1486.8224 | 1488.7433 |
| 1495.1114 | 1505.8108 | 1506.7461 |
| 1518.5006 | 1525.0651 | 3019.8866 |
| 3025.6365 | 3028.9973 | 3035.6226 |
| 3042.9542 | 3050.4789 | 3056.8970 |
| 3063.5802 | 3069.3881 | 3077.0319 |
| 3084.8976 | 3092.2083 | 3097.9912 |
| 3120.4175 | 3129.3553 | 3132.9647 |

Zero-point correction (Hartree): 0.249143

**CI-1**

-----  
 E(RB+HF-LYP/6-311G(d,p)) (Hartree): -501.800361271  
 Electronic state : 1-A  
 Cartesian coordinates (Angs):

|   |           |           |           |
|---|-----------|-----------|-----------|
| C | 1.340797  | -0.409758 | 0.214626  |
| C | 0.213896  | -0.539085 | -0.894573 |
| C | -1.094947 | -0.197939 | -0.286760 |
| C | 0.103485  | 1.794019  | 0.707088  |
| C | 1.257264  | 1.133991  | -0.066782 |
| C | 0.774145  | 0.790832  | -1.502217 |
| C | 2.666255  | -1.016086 | -0.264245 |
| C | 1.042270  | -0.937485 | 1.618543  |
| H | 0.161359  | -1.445846 | -1.497848 |
| H | 0.010770  | 2.834601  | 0.384840  |
| H | 0.340962  | 1.821467  | 1.773684  |
| H | 2.183102  | 1.704597  | 0.040767  |
| H | 0.055243  | 1.466234  | -1.970269 |
| H | 1.585937  | 0.602305  | -2.201471 |
| H | 2.952201  | -0.693786 | -1.266560 |
| H | 2.608823  | -2.108554 | -0.268560 |
| H | 3.472913  | -0.729062 | 0.417501  |
| H | 0.998015  | -2.030833 | 1.610458  |
| H | 0.100141  | -0.578123 | 2.034054  |
| H | 1.840750  | -0.647114 | 2.308759  |
| C | -1.247563 | 1.059123  | 0.487270  |
| H | -1.990460 | 1.666810  | -0.045799 |
| H | -1.773428 | 0.798539  | 1.413034  |
| O | -3.285628 | -0.609533 | 0.104126  |
| O | -2.074365 | -0.981331 | -0.455413 |

Rotational constants (GHz): 1.8660600 0.8699600 0.8081700  
 Vibrational harmonic frequencies (cm-1):

|           |           |           |
|-----------|-----------|-----------|
| 75.2957   | 163.3666  | 181.4999  |
| 189.9938  | 225.1594  | 262.9550  |
| 271.1592  | 299.4813  | 369.4473  |
| 385.9850  | 411.8201  | 428.5024  |
| 460.2371  | 528.6437  | 581.9405  |
| 622.2011  | 675.2887  | 771.6298  |
| 782.8986  | 827.0507  | 852.9829  |
| 880.7312  | 887.1679  | 930.5552  |
| 951.3270  | 960.4299  | 969.6982  |
| 1001.4738 | 1016.8823 | 1055.4392 |
| 1066.2030 | 1100.7421 | 1122.8934 |
| 1162.5923 | 1189.5585 | 1206.7284 |
| 1233.9633 | 1237.6189 | 1248.9165 |
| 1263.8149 | 1296.1682 | 1308.9472 |
| 1319.3865 | 1358.0217 | 1380.5087 |
| 1407.4634 | 1428.2271 | 1450.1451 |
| 1487.5269 | 1489.7567 | 1504.2890 |
| 1507.6410 | 1515.9727 | 1521.9893 |
| 1554.5691 | 3021.1065 | 3024.2855 |
| 3029.8850 | 3040.6454 | 3044.2882 |
| 3060.3960 | 3067.5028 | 3077.2626 |

|           |           |           |
|-----------|-----------|-----------|
| 3078.7718 | 3084.8398 | 3099.0153 |
| 3107.0366 | 3114.1180 | 3132.8712 |

Zero-point correction (Hartree): 0.214984

**CI-2**

-----  
E(RB+HF-LYP/6-311G(d,p)) (Hartree): -501.796884488  
Electronic state : 1-A  
Cartesian coordinates (Angs):

|   |           |           |           |
|---|-----------|-----------|-----------|
| C | 1.013762  | -0.624064 | 0.230764  |
| C | -0.076897 | -0.341269 | -0.908484 |
| C | -1.165807 | 0.380442  | -0.221169 |
| C | 0.616817  | 1.882845  | 0.696158  |
| C | 1.481732  | 0.851434  | -0.050726 |
| C | 0.926856  | 0.691850  | -1.493193 |
| C | 2.037834  | -1.665922 | -0.234346 |
| C | 0.514308  | -1.016288 | 1.621484  |
| H | -0.459581 | -1.182435 | -1.481225 |
| H | 0.965067  | 2.891138  | 0.457725  |
| H | 0.728560  | 1.757410  | 1.775678  |
| H | 2.546522  | 1.061496  | 0.077479  |
| H | 0.520188  | 1.578541  | -1.983682 |
| H | 1.631099  | 0.216577  | -2.172142 |
| H | 2.429037  | -1.472458 | -1.234119 |
| H | 1.588894  | -2.662730 | -0.237394 |
| H | 2.887015  | -1.683583 | 0.456559  |
| H | 0.013202  | -1.985851 | 1.575315  |
| H | -0.198615 | -0.309592 | 2.048805  |
| H | 1.355745  | -1.098537 | 2.316904  |
| C | -0.888821 | 1.758929  | 0.297024  |
| H | -1.110709 | 2.475540  | -0.502481 |
| H | -1.564407 | 1.990573  | 1.121685  |
| O | -2.489261 | -1.477231 | -0.301613 |
| O | -2.272079 | -0.158248 | 0.071091  |

Rotational constants (GHz): 1.5112400 1.1075600 0.8801900  
Vibrational harmonic frequencies (cm-1):

|           |           |           |
|-----------|-----------|-----------|
| 75.4748   | 141.9144  | 161.7989  |
| 206.3993  | 222.4808  | 271.2202  |
| 286.7862  | 301.6233  | 374.8305  |
| 382.5906  | 413.7760  | 443.1967  |
| 454.4604  | 550.2608  | 581.2394  |
| 636.7706  | 658.4209  | 769.7052  |
| 792.7288  | 813.4154  | 849.0282  |
| 881.8458  | 905.9363  | 931.1224  |
| 944.8562  | 957.5765  | 967.4001  |
| 1001.9893 | 1015.5618 | 1047.7229 |
| 1071.7053 | 1091.9272 | 1115.3240 |
| 1166.1616 | 1194.0640 | 1212.2144 |
| 1229.9852 | 1236.5342 | 1249.5127 |
| 1270.0992 | 1288.2949 | 1311.9247 |
| 1328.7752 | 1348.2492 | 1379.3917 |
| 1408.1601 | 1427.6840 | 1469.8100 |
| 1485.9941 | 1486.9104 | 1504.0133 |
| 1506.5096 | 1518.1813 | 1526.0752 |
| 1555.7683 | 3019.7286 | 3025.7435 |
| 3032.7982 | 3045.9692 | 3060.8432 |
| 3068.2320 | 3081.7385 | 3085.0037 |
| 3096.3319 | 3101.4909 | 3110.2222 |
| 3112.5850 | 3131.8208 | 3139.2077 |

Zero-point correction (Hartree): 0.215371

**HP**

-----  
E(RB+HF-LYP/6-311G(d,p)) (Hartree): -501.823940003  
Electronic state : 1-A  
Cartesian coordinates (Angs):

|                                                           |           |           |           |
|-----------------------------------------------------------|-----------|-----------|-----------|
| C                                                         | 1.364478  | -0.425922 | 0.215532  |
| C                                                         | 0.197433  | -0.517930 | -0.846576 |
| C                                                         | -1.090529 | -0.059098 | -0.203932 |
| C                                                         | 0.190063  | 1.820384  | 0.663286  |
| C                                                         | 1.326985  | 1.116819  | -0.104147 |
| C                                                         | 0.813432  | 0.743266  | -1.524108 |
| C                                                         | 2.651866  | -1.092685 | -0.291270 |
| C                                                         | 1.113501  | -0.897096 | 1.647156  |
| H                                                         | 0.070503  | -1.440219 | -1.415880 |
| H                                                         | 0.089871  | 2.850642  | 0.297490  |
| H                                                         | 0.449350  | 1.903858  | 1.727053  |
| H                                                         | 2.268341  | 1.667100  | -0.021074 |
| H                                                         | 0.113156  | 1.430858  | -2.000647 |
| H                                                         | 1.616226  | 0.503889  | -2.219358 |
| H                                                         | 2.912812  | -0.815917 | -1.313615 |
| H                                                         | 2.554659  | -2.182462 | -0.257443 |
| H                                                         | 3.494957  | -0.817554 | 0.350670  |
| H                                                         | 1.054983  | -1.989955 | 1.682552  |
| H                                                         | 0.190812  | -0.501961 | 2.070159  |
| H                                                         | 1.944196  | -0.594023 | 2.293454  |
| C                                                         | -1.119326 | 1.071583  | 0.501945  |
| H                                                         | -2.021402 | 1.425686  | 0.980105  |
| H                                                         | -3.854127 | -0.231103 | -0.541318 |
| O                                                         | -3.330946 | -0.533600 | 0.214836  |
| O                                                         | -2.115524 | -0.936996 | -0.462269 |
| Rotational constants (GHz): 1.8843200 0.8388200 0.7850000 |           |           |           |
| Vibrational harmonic frequencies (cm-1):                  |           |           |           |
| 81.0336                                                   | 154.1598  | 169.4109  |           |
| 179.6441                                                  | 190.2522  | 232.6603  |           |
| 254.5491                                                  | 267.4353  | 321.0796  |           |
| 342.6054                                                  | 392.3729  | 417.8284  |           |
| 435.5698                                                  | 471.4480  | 576.8503  |           |
| 597.8261                                                  | 656.9623  | 696.5977  |           |
| 796.8878                                                  | 813.0243  | 833.1105  |           |
| 856.7566                                                  | 893.9617  | 897.5965  |           |
| 939.4806                                                  | 950.2407  | 963.2929  |           |
| 968.7248                                                  | 991.4483  | 1021.2331 |           |
| 1059.9297                                                 | 1073.4173 | 1105.1740 |           |
| 1120.6506                                                 | 1124.4530 | 1181.5276 |           |
| 1205.1222                                                 | 1230.7127 | 1233.9936 |           |
| 1249.4585                                                 | 1264.7993 | 1293.2795 |           |
| 1325.6213                                                 | 1355.9486 | 1363.2830 |           |
| 1381.3349                                                 | 1402.2600 | 1420.8689 |           |
| 1484.3016                                                 | 1484.8436 | 1495.9982 |           |
| 1502.3429                                                 | 1516.6054 | 1521.5856 |           |
| 1724.6486                                                 | 2994.1631 | 3012.0064 |           |
| 3017.7536                                                 | 3024.4319 | 3050.9784 |           |
| 3067.9819                                                 | 3068.2104 | 3076.0543 |           |
| 3085.7728                                                 | 3105.1385 | 3123.1505 |           |
| 3127.2054                                                 | 3214.3191 | 3760.9880 |           |
| Zero-point correction (Hartree): 0.214636                 |           |           |           |

**DIO**

-----

E(RB+HF-LYP/6-311G(d,p)) (Hartree): -501.825652708

Electronic state : 1-A

Cartesian coordinates (Angs):

|   |           |           |           |
|---|-----------|-----------|-----------|
| C | 1.226491  | -0.374747 | 0.126825  |
| C | 0.038019  | -0.419270 | -0.903752 |
| C | -1.260751 | -0.203239 | -0.166300 |
| C | 0.021764  | 1.755606  | 0.898382  |
| C | 1.118897  | 1.187182  | -0.015142 |
| C | 0.533202  | 0.956358  | -1.437972 |
| C | 2.524215  | -0.921511 | -0.484472 |
| C | 1.032083  | -1.015884 | 1.503379  |
| H | -0.045558 | -1.275041 | -1.575372 |
| H | -0.041192 | 2.838686  | 0.759574  |
| H | 0.291606  | 1.593664  | 1.945197  |

|                                          |           |           |           |
|------------------------------------------|-----------|-----------|-----------|
| H                                        | 2.048343  | 1.755508  | 0.076070  |
| H                                        | -0.218348 | 1.661896  | -1.799175 |
| H                                        | 1.298318  | 0.847824  | -2.204035 |
| H                                        | 2.739039  | -0.512490 | -1.473144 |
| H                                        | 2.472369  | -2.010452 | -0.579140 |
| H                                        | 3.374112  | -0.684442 | 0.163418  |
| H                                        | 0.980419  | -2.104486 | 1.410248  |
| H                                        | 0.124402  | -0.693247 | 2.014627  |
| H                                        | 1.880818  | -0.779003 | 2.153493  |
| C                                        | -1.362145 | 1.120959  | 0.584118  |
| H                                        | -1.937051 | 1.790926  | -0.060862 |
| H                                        | -1.964226 | 0.966406  | 1.480666  |
| O                                        | -2.437234 | -0.648668 | -0.779034 |
| O                                        | -1.841979 | -1.339892 | 0.411289  |
| Rotational constants (GHz):              | 1.7039700 | 1.0490100 | 0.9449900 |
| Vibrational harmonic frequencies (cm-1): |           |           |           |
| 100.2448                                 | 160.3970  |           | 190.0075  |
| 205.7185                                 | 225.7813  |           | 295.9062  |
| 314.2194                                 | 370.9269  |           | 381.0116  |
| 397.5596                                 | 415.8116  |           | 441.9282  |
| 465.4492                                 | 526.7999  |           | 584.0754  |
| 651.3704                                 | 727.5165  |           | 778.0465  |
| 819.6680                                 | 846.2310  |           | 857.3813  |
| 888.1720                                 | 897.2368  |           | 931.2424  |
| 952.2371                                 | 957.9773  |           | 971.1270  |
| 1009.5010                                | 1019.9504 |           | 1052.4602 |
| 1071.7102                                | 1099.9445 |           | 1132.5523 |
| 1170.1268                                | 1208.6839 |           | 1216.8591 |
| 1226.5655                                | 1235.3097 |           | 1256.5048 |
| 1265.5306                                | 1286.3574 |           | 1287.7469 |
| 1320.2779                                | 1345.5147 |           | 1368.7592 |
| 1408.6463                                | 1425.3693 |           | 1427.4183 |
| 1478.3022                                | 1487.2487 |           | 1490.5967 |
| 1506.3819                                | 1507.4650 |           | 1518.8296 |
| 1525.0152                                | 3021.6436 |           | 3027.4394 |
| 3037.3115                                | 3052.7600 |           | 3055.6511 |
| 3065.0534                                | 3071.7749 |           | 3076.8803 |
| 3083.5379                                | 3090.4287 |           | 3102.0675 |
| 3105.0942                                | 3111.7336 |           | 3130.1800 |
| Zero-point correction (Hartree):         | 0.215823  |           |           |

**LAC-1**

-----

E(RB+HF-LYP/6-311G(d,p)) (Hartree): -501.944049239

Electronic state : 1-A

Cartesian coordinates (Angs):

|   |           |           |           |
|---|-----------|-----------|-----------|
| C | 1.210693  | -0.164405 | 0.251309  |
| C | 0.200879  | -0.786268 | -0.794259 |
| C | -1.162405 | -1.082317 | -0.195759 |
| C | -0.342175 | 1.934698  | 0.395458  |
| C | 0.820362  | 1.243755  | -0.330434 |
| C | 0.357556  | 0.520696  | -1.624743 |
| C | 2.653201  | -0.531581 | -0.124165 |
| C | 0.999614  | -0.452702 | 1.737758  |
| H | 0.519779  | -1.712375 | -1.271080 |
| H | -0.417644 | 2.970668  | 0.043319  |
| H | -0.135292 | 1.990645  | 1.468070  |
| H | 1.656836  | 1.941129  | -0.431442 |
| H | -0.512931 | 0.907128  | -2.154606 |
| H | 1.163051  | 0.411730  | -2.350221 |
| H | 2.874984  | -0.349956 | -1.178196 |
| H | 2.845283  | -1.588885 | 0.080027  |
| H | 3.358674  | 0.057719  | 0.470125  |
| H | 1.218047  | -1.503435 | 1.950684  |
| H | -0.017900 | -0.256421 | 2.075084  |
| H | 1.681278  | 0.154296  | 2.342785  |
| C | -1.721772 | 1.317886  | 0.155056  |
| H | -2.054748 | 1.504963  | -0.869320 |

|                                                       |           |           |           |
|-------------------------------------------------------|-----------|-----------|-----------|
| H                                                     | -2.449781 | 1.783117  | 0.819980  |
| O                                                     | -1.609079 | -2.197618 | -0.157056 |
| O                                                     | -1.869091 | -0.090994 | 0.429990  |
| Rotational constants (GHz):                           | 1.5017400 | 1.1543600 | 0.9274100 |
| Vibrational harmonic frequencies (cm <sup>-1</sup> ): |           |           |           |
| 87.7888                                               | 167.2293  | 193.1153  |           |
| 209.8880                                              | 223.0826  | 261.3526  |           |
| 316.5682                                              | 340.8225  | 362.4714  |           |
| 388.4153                                              | 402.7524  | 436.0715  |           |
| 458.3628                                              | 541.3946  | 632.0325  |           |
| 648.0451                                              | 725.2274  | 750.6747  |           |
| 788.8820                                              | 839.0689  | 874.9726  |           |
| 916.5282                                              | 924.3427  | 948.8292  |           |
| 959.6583                                              | 968.3320  | 1009.7395 |           |
| 1026.8889                                             | 1058.8517 | 1084.1373 |           |
| 1095.8791                                             | 1136.8607 | 1158.6608 |           |
| 1169.5436                                             | 1218.5607 | 1223.7637 |           |
| 1248.6733                                             | 1257.9256 | 1267.9301 |           |
| 1300.4107                                             | 1303.0236 | 1330.4780 |           |
| 1355.3291                                             | 1390.4757 | 1404.4848 |           |
| 1424.3476                                             | 1426.4581 | 1481.8152 |           |
| 1489.1235                                             | 1494.4874 | 1500.4365 |           |
| 1509.8131                                             | 1520.0477 | 1530.8316 |           |
| 1810.4185                                             | 3019.0630 | 3021.1459 |           |
| 3026.5266                                             | 3043.7096 | 3046.9278 |           |
| 3066.1247                                             | 3077.2560 | 3079.6727 |           |
| 3084.2858                                             | 3097.0633 | 3101.6720 |           |
| 3104.9990                                             | 3120.6023 | 3122.4261 |           |
| Zero-point correction (Hartree): 0.217808             |           |           |           |

#### LAC-2

-----

E(RB+HF-LYP/6-311G(d,p)) (Hartree): -501.945694983

Electronic state : 1-A

Cartesian coordinates (Angs):

|                                                       |           |           |           |
|-------------------------------------------------------|-----------|-----------|-----------|
| C                                                     | 1.286272  | -0.318447 | 0.241385  |
| C                                                     | 0.493627  | -0.481182 | -1.095164 |
| C                                                     | -1.811530 | -0.406876 | -0.142378 |
| C                                                     | -0.382550 | 1.566960  | 0.946464  |
| C                                                     | 0.899373  | 1.208616  | 0.187098  |
| C                                                     | 0.655297  | 1.036669  | -1.340409 |
| C                                                     | 2.790060  | -0.512464 | -0.003642 |
| C                                                     | 0.858591  | -1.165844 | 1.437335  |
| H                                                     | 0.912755  | -1.159760 | -1.838084 |
| H                                                     | -0.469567 | 2.656935  | 1.000096  |
| H                                                     | -0.303945 | 1.220275  | 1.981157  |
| H                                                     | 1.704179  | 1.889993  | 0.476481  |
| H                                                     | -0.182932 | 1.560527  | -1.799419 |
| H                                                     | 1.545599  | 1.240741  | -1.935566 |
| H                                                     | 3.155095  | 0.064834  | -0.856591 |
| H                                                     | 3.018246  | -1.566111 | -0.191191 |
| H                                                     | 3.360154  | -0.197865 | 0.875681  |
| H                                                     | 1.091996  | -2.218923 | 1.255392  |
| H                                                     | -0.207085 | -1.110110 | 1.660515  |
| H                                                     | 1.402427  | -0.854969 | 2.335184  |
| C                                                     | -1.691864 | 1.045261  | 0.320886  |
| H                                                     | -1.937908 | 1.650794  | -0.558373 |
| H                                                     | -2.516207 | 1.181687  | 1.020841  |
| O                                                     | -2.793975 | -1.058446 | 0.091807  |
| O                                                     | -0.850582 | -0.965831 | -0.933753 |
| Rotational constants (GHz):                           | 1.8164100 | 0.9746500 | 0.8957500 |
| Vibrational harmonic frequencies (cm <sup>-1</sup> ): |           |           |           |
| 81.2307                                               | 147.2314  | 189.0002  |           |
| 214.1556                                              | 232.8772  | 271.9099  |           |
| 301.5463                                              | 331.5386  | 361.1693  |           |
| 375.3274                                              | 425.0158  | 471.8311  |           |
| 484.3988                                              | 522.9558  | 572.9943  |           |
| 650.6244                                              | 689.4892  | 747.3090  |           |

|           |           |           |
|-----------|-----------|-----------|
| 797.4211  | 832.5366  | 884.2327  |
| 888.3353  | 894.1239  | 953.0787  |
| 955.9349  | 969.5813  | 998.8209  |
| 1019.1598 | 1053.3149 | 1065.1685 |
| 1108.1198 | 1147.7139 | 1158.5067 |
| 1175.1126 | 1190.4270 | 1228.7267 |
| 1241.1572 | 1246.7069 | 1266.3702 |
| 1279.5915 | 1302.1830 | 1344.3927 |
| 1369.5261 | 1385.0901 | 1399.6571 |
| 1407.7630 | 1427.7596 | 1471.9122 |
| 1485.9578 | 1489.9569 | 1499.9453 |
| 1504.6585 | 1510.4595 | 1516.3933 |
| 1809.9633 | 3021.9881 | 3028.5216 |
| 3029.1900 | 3034.4958 | 3050.0097 |
| 3064.2062 | 3076.5789 | 3080.1085 |
| 3085.9084 | 3093.2553 | 3096.4028 |
| 3109.3418 | 3113.7054 | 3121.7142 |

Zero-point correction (Hartree): 0.217236

#### ACID

-----  
 E(RB+HF-LYP/6-311G(d,p)) (Hartree): -501.927157805  
 Electronic state : 1-A  
 Cartesian coordinates (Angs):

|   |           |           |           |
|---|-----------|-----------|-----------|
| C | 1.932571  | -0.023589 | 0.152415  |
| C | 1.365091  | -1.225150 | 0.903245  |
| C | -2.428659 | 0.070123  | 0.238933  |
| C | -0.324977 | 0.896808  | -1.088873 |
| C | 0.686540  | -0.238492 | -0.830497 |
| C | 0.323552  | -1.399506 | 0.086942  |
| C | 3.282346  | -0.292463 | -0.525339 |
| C | 1.990297  | 1.287884  | 0.939253  |
| H | 1.729388  | -1.765607 | 1.770941  |
| H | -0.823406 | 0.706430  | -2.050538 |
| H | 0.225286  | 1.828269  | -1.258923 |
| H | 1.051716  | -0.579951 | -1.806416 |
| H | -2.343947 | -0.367276 | -1.630438 |
| H | -0.479640 | -2.126150 | 0.053140  |
| H | 3.258992  | -1.223657 | -1.097744 |
| H | 4.079795  | -0.376762 | 0.219943  |
| H | 3.550839  | 0.521927  | -1.206544 |
| H | 2.178845  | 2.140837  | 0.278627  |
| H | 2.809618  | 1.251405  | 1.664164  |
| H | 1.073050  | 1.480657  | 1.496969  |
| C | -1.389607 | 1.158940  | -0.009887 |
| H | -1.955600 | 2.057476  | -0.286204 |
| H | -0.943027 | 1.363566  | 0.961299  |
| O | -2.829683 | -0.650345 | -0.846842 |
| O | -2.924670 | -0.139466 | 1.308663  |

Rotational constants (GHz): 2.1575000 0.6403700 0.6287000  
 Vibrational harmonic frequencies (cm-1):

|           |           |           |
|-----------|-----------|-----------|
| 41.0141   | 45.6784   | 80.5910   |
| 116.1941  | 180.8167  | 233.6733  |
| 254.1416  | 269.7867  | 280.5659  |
| 330.1056  | 358.4639  | 389.3152  |
| 424.4610  | 469.7156  | 504.8128  |
| 565.4237  | 604.0787  | 629.0973  |
| 657.4472  | 751.4801  | 798.1088  |
| 809.5881  | 866.2797  | 893.4620  |
| 927.7969  | 944.2118  | 957.9783  |
| 974.9957  | 989.9548  | 1012.5172 |
| 1027.6181 | 1068.6169 | 1113.5340 |
| 1149.7722 | 1177.6626 | 1189.4895 |
| 1212.0472 | 1229.7314 | 1258.9041 |
| 1267.7273 | 1310.4260 | 1326.6196 |
| 1348.4526 | 1367.0115 | 1389.9008 |
| 1399.7830 | 1420.0070 | 1464.7908 |



|           |           |           |
|-----------|-----------|-----------|
| 1484.8543 | 1492.3735 | 1499.5416 |
| 1508.8858 | 1513.2015 | 1638.1109 |
| 1857.6273 | 2974.7523 | 3011.7405 |
| 3015.2966 | 3022.2704 | 3025.4750 |
| 3045.9099 | 3070.7385 | 3076.5361 |
| 3088.0893 | 3110.9489 | 3131.5652 |
| 3161.8292 | 3197.0545 | 3802.3417 |

Zero-point correction (Hartree): 0.213722

**HC1 (formed by CO2-loss)**

-----  
E(RB+HF-LYP/6-311G(d,p)) (Hartree): -313.324867242

Electronic state : 1-A

Cartesian coordinates (Angs):

|   |           |           |           |
|---|-----------|-----------|-----------|
| C | -0.766824 | 0.116998  | -0.000002 |
| C | 0.313024  | -0.399943 | -1.026137 |
| C | 1.509178  | 0.544995  | 0.784656  |
| C | 0.313022  | -0.399935 | 1.026139  |
| C | 0.635504  | -1.526143 | 0.000006  |
| C | -2.078411 | -0.681923 | -0.000001 |
| C | -1.138394 | 1.603395  | -0.000003 |
| H | 0.048770  | -0.619699 | -2.062344 |
| H | 2.432839  | 0.136481  | 1.201814  |
| H | 1.365898  | 1.539155  | 1.212547  |
| H | 0.048764  | -0.619684 | 2.062347  |
| H | 1.656670  | -1.916719 | 0.000008  |
| H | -0.067460 | -2.354835 | 0.000008  |
| H | -1.944971 | -1.763217 | -0.000014 |
| H | -2.675473 | -0.425297 | -0.881323 |
| H | -2.675463 | -0.425317 | 0.881334  |
| H | -1.742781 | 1.842226  | -0.881535 |
| H | -0.280493 | 2.274475  | -0.000029 |
| H | -1.742739 | 1.842238  | 0.881556  |
| C | 1.509182  | 0.544986  | -0.784658 |
| H | 2.432844  | 0.136463  | -1.201806 |
| H | 1.365910  | 1.539142  | -1.212562 |

Rotational constants (GHz): 3.0899800 2.1340600 1.7725400

Vibrational harmonic frequencies (cm-1):

|           |           |           |
|-----------|-----------|-----------|
| 150.6809  | 204.4784  | 221.7532  |
| 314.5073  | 350.1899  | 392.6236  |
| 412.5788  | 489.2911  | 512.5865  |
| 630.8304  | 666.4971  | 792.9972  |
| 829.9941  | 841.8620  | 852.7104  |
| 896.2314  | 928.2651  | 932.9587  |
| 953.7631  | 971.9732  | 987.7650  |
| 1001.8496 | 1023.1459 | 1027.9910 |
| 1083.4308 | 1109.3249 | 1141.8348 |
| 1185.9332 | 1196.0831 | 1219.5652 |
| 1225.0730 | 1250.1299 | 1253.5507 |
| 1258.2798 | 1291.0874 | 1309.0489 |
| 1332.2734 | 1406.1284 | 1424.8747 |
| 1484.2497 | 1485.4785 | 1501.3276 |
| 1505.4682 | 1516.8970 | 1521.7962 |
| 1535.1147 | 3018.0011 | 3024.9952 |
| 3045.0126 | 3049.4501 | 3053.5441 |
| 3064.6139 | 3071.7644 | 3077.2444 |
| 3079.0764 | 3083.8643 | 3093.8696 |
| 3116.8863 | 3129.5185 | 3145.5897 |

Zero-point correction (Hartree): 0.202023

**HC2 (formed by CO2-loss)**

-----  
E(RB+HF-LYP/6-311G(d,p)) (Hartree): -313.31665858

Electronic state : 1-A

Cartesian coordinates (Angs):

|   |           |           |          |
|---|-----------|-----------|----------|
| C | -0.863865 | -0.313170 | 0.030945 |
| C | -1.596536 | 0.995670  | 0.318210 |
| C | 1.712221  | 0.564477  | 0.233912 |

|                                          |           |           |           |
|------------------------------------------|-----------|-----------|-----------|
| C                                        | 0.339817  | 0.638512  | -0.438448 |
| C                                        | -0.584474 | 1.781858  | -0.053675 |
| C                                        | -1.471293 | -1.148123 | -1.101130 |
| C                                        | -0.620081 | -1.177474 | 1.271269  |
| H                                        | -2.601114 | 1.188926  | 0.681920  |
| H                                        | 1.595161  | 0.527328  | 1.321671  |
| H                                        | 2.240149  | 1.502937  | 0.023026  |
| H                                        | 0.480211  | 0.565873  | -1.525451 |
| H                                        | -0.452861 | 2.858229  | -0.095090 |
| H                                        | -1.655478 | -0.535152 | -1.987689 |
| H                                        | -2.426070 | -1.587253 | -0.792632 |
| H                                        | -0.805490 | -1.969330 | -1.386527 |
| H                                        | 0.038213  | -2.023957 | 1.052384  |
| H                                        | -1.569895 | -1.586735 | 1.631371  |
| H                                        | -0.181078 | -0.602299 | 2.089049  |
| C                                        | 2.574377  | -0.609136 | -0.244437 |
| H                                        | 2.741797  | -0.556877 | -1.324850 |
| H                                        | 2.102379  | -1.571501 | -0.030435 |
| H                                        | 3.553080  | -0.605878 | 0.243370  |
| Rotational constants (GHz):              | 2.7153400 | 1.6744400 | 1.3738900 |
| Vibrational harmonic frequencies (cm-1): |           |           |           |
| 97.5190                                  | 123.8354  |           | 193.4592  |
| 240.4120                                 | 254.9160  |           | 260.7850  |
| 288.6406                                 | 339.1136  |           | 347.0625  |
| 376.2718                                 | 438.2475  |           | 549.1576  |
| 648.1016                                 | 729.9895  |           | 764.0348  |
| 838.8779                                 | 866.2028  |           | 916.9156  |
| 946.5288                                 | 953.8406  |           | 965.3387  |
| 990.2512                                 | 1008.2558 |           | 1051.6197 |
| 1070.6047                                | 1099.0551 |           | 1134.5872 |
| 1186.2198                                | 1191.4046 |           | 1239.2383 |
| 1253.0780                                | 1283.7802 |           | 1320.1376 |
| 1341.6882                                | 1384.5304 |           | 1396.7741 |
| 1412.2974                                | 1417.3216 |           | 1482.6416 |
| 1488.7081                                | 1493.9698 |           | 1500.7667 |
| 1505.4753                                | 1508.8116 |           | 1515.2904 |
| 1639.1522                                | 2992.0579 |           | 3010.6529 |
| 3011.5214                                | 3020.7396 |           | 3024.4931 |
| 3048.7129                                | 3069.1212 |           | 3074.7565 |
| 3084.0567                                | 3085.4441 |           | 3093.1527 |
| 3101.0299                                | 3148.2983 |           | 3181.2895 |
| Zero-point correction (Hartree):         | 0.198201  |           |           |

### H<sub>2</sub>CO

-----  
 E(RB+HF-LYP/6-311G(d,p)) (Hartree): -114.536341384  
 Point group : C2V  
 Electronic state : 1-A1  
 Cartesian coordinates (Angs):

|   |          |           |           |
|---|----------|-----------|-----------|
| O | 0.000000 | 0.000000  | 0.674024  |
| C | 0.000000 | 0.000000  | -0.525922 |
| H | 0.000000 | 0.938531  | -1.118330 |
| H | 0.000000 | -0.938531 | -1.118330 |

Rotational constants (GHz): 284.6461200 39.0463600 34.3362800  
 Vibrational harmonic frequencies (cm-1):

|           |           |           |
|-----------|-----------|-----------|
| 1202.0395 | 1270.0158 | 1539.0889 |
| 1827.0102 | 2870.2323 | 2919.4757 |

Zero-point correction (Hartree): 0.026490

### H<sub>2</sub>COO

-----  
 E(RB+HF-LYP/6-311G(d,p)) (Hartree): -189.633443828  
 Point group : CS  
 Electronic state : 1-A'  
 Cartesian coordinates (Angs):

|   |          |          |          |
|---|----------|----------|----------|
| O | 0.000000 | 0.455955 | 0.000000 |
|---|----------|----------|----------|

|   |           |           |          |
|---|-----------|-----------|----------|
| C | 1.071840  | -0.206448 | 0.000000 |
| H | 1.979889  | 0.382038  | 0.000000 |
| H | 1.020866  | -1.290205 | 0.000000 |
| O | -1.178974 | -0.187598 | 0.000000 |

Rotational constants (GHz): 81.4771000 12.3770900 10.7448500  
 Vibrational harmonic frequencies (cm-1):  
 534.6570 ( A') 674.7096 ( A") 909.8832 ( A")  
 933.3384 ( A') 1241.0006 ( A') 1397.1386 ( A')  
 1527.3225 ( A') 3120.1615 ( A') 3276.9189 ( A')  
 Zero-point correction (Hartree): 0.031018

**RAD-1**

-----  
 E(UB+HF-LYP/6-311G(d,p)) (Hartree): -426.047897835  
 Electronic state : 2-A  
 Cartesian coordinates (Angs):

|   |           |           |           |
|---|-----------|-----------|-----------|
| C | 1.053123  | -0.249098 | 0.200429  |
| C | -0.068820 | -0.652174 | -0.835129 |
| C | -1.442003 | -0.572610 | -0.178330 |
| C | -0.582952 | 1.684451  | 0.638613  |
| C | 0.658568  | 1.233390  | -0.149592 |
| C | 0.189827  | 0.715849  | -1.537282 |
| C | 2.454533  | -0.604781 | -0.315702 |
| C | 0.932067  | -0.737244 | 1.645355  |
| H | 0.035395  | -1.583707 | -1.392494 |
| H | -0.941544 | 2.649095  | 0.249936  |
| H | -0.338844 | 1.874108  | 1.693816  |
| H | 1.450760  | 1.985535  | -0.112517 |
| H | -0.671401 | 1.213356  | -1.990181 |
| H | 0.990681  | 0.664096  | -2.272886 |
| H | 2.626218  | -0.290530 | -1.346474 |
| H | 2.614781  | -1.686149 | -0.267151 |
| H | 3.218452  | -0.128045 | 0.307225  |
| H | 1.093245  | -1.818710 | 1.692525  |
| H | -0.042630 | -0.535446 | 2.091933  |
| H | 1.693493  | -0.263331 | 2.273639  |
| C | -1.672780 | 0.663054  | 0.539127  |
| H | -2.632720 | 0.806383  | 1.023833  |
| O | -2.278158 | -1.471459 | -0.249517 |

Rotational constants (GHz): 1.9807200 1.2698800 1.1695700  
 Vibrational harmonic frequencies (cm-1):  
 120.8989 175.6949 200.8874  
 218.2165 225.1938 295.5183  
 356.4678 386.7359 416.5414  
 433.7010 472.1122 492.0248  
 577.7297 617.1896 665.5376  
 731.4668 776.2376 827.2638  
 856.7665 879.9908 907.2100  
 935.5738 948.9141 962.3884  
 972.0480 1014.8303 1057.7756  
 1065.2678 1070.6651 1118.8390  
 1153.3764 1199.7325 1211.8516  
 1228.5407 1239.3487 1250.9332  
 1286.9079 1292.9859 1310.2342  
 1366.7925 1377.4111 1404.0072  
 1424.3287 1459.1975 1485.3980  
 1488.5846 1501.9399 1512.7072  
 1518.5668 1626.3898 2979.5238  
 2994.4776 3019.6022 3025.4167  
 3052.4905 3059.7960 3074.0926  
 3080.3034 3094.6912 3103.3334  
 3104.8169 3124.1516 3177.2336  
 Zero-point correction (Hartree): 0.198221

**RAD-2**

-----

E(UB+HF-LYP/6-311G(d,p)) (Hartree): -426.020140323  
Electronic state : 2-A  
Cartesian coordinates (Angs):

|   |           |           |           |
|---|-----------|-----------|-----------|
| C | 1.080587  | -0.290303 | 0.123034  |
| C | 0.005988  | -0.340989 | -0.993570 |
| C | -1.351054 | -0.613089 | -0.426908 |
| C | -0.649089 | 1.408051  | 1.033223  |
| C | 0.627507  | 1.227553  | 0.192301  |
| C | 0.229088  | 1.137589  | -1.314272 |
| C | 2.517341  | -0.434864 | -0.399690 |
| C | 0.903082  | -1.185474 | 1.348449  |
| H | -0.929986 | 2.464968  | 1.027815  |
| H | -0.443462 | 1.147998  | 2.074964  |
| H | 1.409433  | 1.944455  | 0.467192  |
| H | -0.627656 | 1.721538  | -1.654095 |
| H | 1.068305  | 1.311016  | -1.986361 |
| H | 2.715163  | 0.177641  | -1.280173 |
| H | 2.718367  | -1.475660 | -0.666616 |
| H | 3.228596  | -0.142607 | 0.379577  |
| H | 1.086699  | -2.229289 | 1.078372  |
| H | -0.095429 | -1.136597 | 1.784658  |
| H | 1.622707  | -0.912334 | 2.126673  |
| C | -1.820834 | 0.547553  | 0.483863  |
| H | -2.489549 | 1.161179  | -0.129590 |
| H | -2.439690 | 0.118949  | 1.274118  |
| O | -2.009899 | -1.610928 | -0.596889 |

Rotational constants (GHz): 1.9459900 1.3018200 1.1535800  
Vibrational harmonic frequencies (cm-1):

|           |           |           |
|-----------|-----------|-----------|
| 84.6633   | 167.4406  | 187.7469  |
| 201.3604  | 229.0977  | 285.7419  |
| 373.9579  | 376.6550  | 410.6690  |
| 424.3938  | 450.6861  | 480.5463  |
| 548.7106  | 612.2396  | 655.8067  |
| 750.7352  | 762.0224  | 819.9295  |
| 864.7710  | 884.6709  | 933.1223  |
| 948.4844  | 966.9543  | 969.4924  |
| 998.4565  | 1019.9395 | 1020.7763 |
| 1064.9392 | 1089.5959 | 1121.2073 |
| 1172.1378 | 1189.2709 | 1209.3499 |
| 1210.0333 | 1236.4499 | 1258.1841 |
| 1271.6014 | 1293.7247 | 1321.0706 |
| 1355.7730 | 1404.6044 | 1425.8862 |
| 1461.3875 | 1484.7849 | 1488.1616 |
| 1504.1370 | 1506.5870 | 1514.2661 |
| 1521.1735 | 1781.8916 | 3017.4451 |
| 3025.4242 | 3031.0510 | 3034.6360 |
| 3044.4601 | 3069.6689 | 3071.6047 |
| 3082.9989 | 3088.8261 | 3098.3766 |
| 3111.4658 | 3113.9288 | 3123.2437 |

Zero-point correction (Hartree): 0.198721

**RAD-3(a)**

-----  
E(UB+HF-LYP/6-311G(d,p)) (Hartree): -501.77686192  
Electronic state : 1-A  
Cartesian coordinates (Angs):

|   |           |           |           |
|---|-----------|-----------|-----------|
| C | -2.485273 | 0.009943  | -0.127488 |
| C | 1.131742  | 1.396420  | -0.197434 |
| C | 1.827398  | 0.264231  | -0.039206 |
| C | -0.242250 | -0.981717 | 0.572846  |
| C | -0.994631 | 0.020069  | -0.340887 |
| C | -0.369899 | 1.426452  | -0.173217 |
| C | -3.365061 | -0.683362 | -1.119186 |
| C | -3.064667 | 0.326548  | 1.216534  |
| H | 1.678264  | 2.319980  | -0.360675 |
| H | -0.703991 | -1.970473 | 0.504634  |
| H | -0.339466 | -0.657352 | 1.614634  |
| H | -0.803372 | -0.288762 | -1.376487 |

|                                          |           |           |           |
|------------------------------------------|-----------|-----------|-----------|
| H                                        | -0.736207 | 2.087873  | -0.965907 |
| H                                        | -0.708053 | 1.880122  | 0.767798  |
| H                                        | -2.983731 | -0.588961 | -2.140384 |
| H                                        | -4.386147 | -0.287480 | -1.098493 |
| H                                        | -3.451395 | -1.764922 | -0.912573 |
| H                                        | -4.032144 | 0.833201  | 1.123686  |
| H                                        | -2.412578 | 0.961848  | 1.821166  |
| H                                        | -3.253739 | -0.586292 | 1.806472  |
| C                                        | 1.246974  | -1.088955 | 0.210942  |
| H                                        | 1.396259  | -1.712640 | -0.678579 |
| H                                        | 1.814443  | -1.579969 | 1.006160  |
| O                                        | 3.890014  | -0.741578 | -0.016714 |
| O                                        | 3.211968  | 0.393585  | -0.124396 |
| Rotational constants (GHz):              | 2.7483100 | 0.5253600 | 0.4949900 |
| Vibrational harmonic frequencies (cm-1): |           |           |           |
| 42.1432                                  | 63.2100   |           | 95.8734   |
| 121.4860                                 | 123.1329  |           | 150.4658  |
| 181.6332                                 | 244.9994  |           | 254.5199  |
| 281.6244                                 | 310.1622  |           | 385.2777  |
| 420.9086                                 | 447.9044  |           | 487.3148  |
| 519.2765                                 | 562.4546  |           | 652.7710  |
| 763.6041                                 | 794.6258  |           | 829.6693  |
| 855.1558                                 | 917.8143  |           | 940.2785  |
| 943.5069                                 | 965.3834  |           | 981.6655  |
| 1012.6580                                | 1036.5669 |           | 1044.9383 |
| 1067.2812                                | 1083.1425 |           | 1090.1522 |
| 1164.8865                                | 1167.2066 |           | 1194.0925 |
| 1240.8857                                | 1273.6546 |           | 1294.7247 |
| 1318.5708                                | 1326.2076 |           | 1341.4044 |
| 1362.1544                                | 1391.7880 |           | 1398.8353 |
| 1402.9139                                | 1418.1801 |           | 1469.0725 |
| 1472.0094                                | 1475.5746 |           | 1477.5589 |
| 1483.4410                                | 1495.7038 |           | 1500.7882 |
| 1689.6198                                | 2924.7062 |           | 2940.3321 |
| 2998.9644                                | 3008.7809 |           | 3022.8620 |
| 3025.2121                                | 3028.8237 |           | 3029.6075 |
| 3041.7349                                | 3067.6290 |           | 3074.2465 |
| 3076.2643                                | 3083.1502 |           | 3165.0599 |
| Zero-point correction (Hartree):         | 0.210772  |           |           |

**RAD-3(b)**

-----  
 E(UB+HF-LYP/6-311G(d,p)) (Hartree): -501.77500172  
 Electronic state : 1-A  
 Cartesian coordinates (Angs):

|   |           |           |           |
|---|-----------|-----------|-----------|
| C | 2.480797  | -0.184039 | -0.123703 |
| C | -1.300382 | -1.050877 | -0.091282 |
| C | -1.821982 | 0.171134  | 0.001085  |
| C | 0.409188  | 1.161877  | 0.509229  |
| C | 1.003228  | 0.010029  | -0.342504 |
| C | 0.185083  | -1.282746 | -0.101523 |
| C | 3.454255  | 0.277288  | -1.161563 |
| C | 3.014768  | -0.492759 | 1.240915  |
| H | -1.973867 | -1.896295 | -0.163787 |
| H | 1.006288  | 2.068899  | 0.381865  |
| H | 0.461478  | 0.890836  | 1.569182  |
| H | 0.855192  | 0.286225  | -1.394242 |
| H | 0.434272  | -2.018745 | -0.873828 |
| H | 0.481087  | -1.745723 | 0.848967  |
| H | 3.031626  | 0.231758  | -2.169263 |
| H | 4.370583  | -0.323933 | -1.149434 |
| H | 3.774163  | 1.321422  | -0.996533 |
| H | 3.884184  | -1.158400 | 1.187152  |
| H | 2.273423  | -0.965917 | 1.889695  |
| H | 3.359551  | 0.416464  | 1.761795  |
| C | -1.051138 | 1.449211  | 0.129007  |
| H | -1.100793 | 2.000977  | -0.817878 |

|                                           |           |           |           |
|-------------------------------------------|-----------|-----------|-----------|
| H                                         | -1.530017 | 2.086031  | 0.879965  |
| O                                         | -3.993292 | -0.620288 | -0.161031 |
| O                                         | -3.202967 | 0.426749  | -0.002922 |
| Rotational constants (GHz):               | 2.8100200 | 0.5166000 | 0.4896100 |
| Vibrational harmonic frequencies (cm-1):  |           |           |           |
| 40.2598                                   | 54.2621   | 73.1999   |           |
| 103.2806                                  | 115.1949  | 153.3958  |           |
| 181.5306                                  | 233.7797  | 258.0966  |           |
| 281.2818                                  | 313.1785  | 386.0336  |           |
| 408.0601                                  | 438.5284  | 491.5016  |           |
| 524.1074                                  | 532.1747  | 671.9402  |           |
| 778.7863                                  | 794.0491  | 840.2853  |           |
| 863.3848                                  | 925.6339  | 938.4346  |           |
| 941.8993                                  | 966.8006  | 978.7507  |           |
| 1012.2597                                 | 1037.0682 | 1044.3926 |           |
| 1050.7717                                 | 1077.3263 | 1098.2685 |           |
| 1162.1822                                 | 1170.7707 | 1193.6104 |           |
| 1245.2754                                 | 1273.8549 | 1294.6798 |           |
| 1318.9865                                 | 1327.0304 | 1342.7654 |           |
| 1360.2259                                 | 1390.7106 | 1397.9656 |           |
| 1401.8621                                 | 1418.4916 | 1468.3001 |           |
| 1473.4594                                 | 1477.4239 | 1481.1740 |           |
| 1484.1697                                 | 1495.3352 | 1501.0803 |           |
| 1691.4263                                 | 2924.7238 | 2940.2911 |           |
| 2998.2313                                 | 3007.8269 | 3013.4817 |           |
| 3022.3396                                 | 3024.4527 | 3028.7537 |           |
| 3040.2630                                 | 3054.3078 | 3073.2809 |           |
| 3077.2081                                 | 3083.1399 | 3191.3924 |           |
| Zero-point correction (Hartree): 0.210636 |           |           |           |

### Nopinone

-----  
 E(RB+HF-LYP/6-311G(d,p)) (Hartree): -426.698631617  
 Electronic state : 1-A  
 Cartesian coordinates (Angs):

|                                          |           |           |           |
|------------------------------------------|-----------|-----------|-----------|
| C                                        | 1.071802  | -0.237819 | 0.190451  |
| C                                        | 0.004183  | -0.560616 | -0.930883 |
| C                                        | -1.361346 | -0.640177 | -0.282578 |
| C                                        | -0.619939 | 1.597380  | 0.799312  |
| C                                        | 0.641007  | 1.258886  | -0.009012 |
| C                                        | 0.228826  | 0.887313  | -1.459782 |
| C                                        | 2.500511  | -0.499637 | -0.304761 |
| C                                        | 0.904962  | -0.892455 | 1.563551  |
| H                                        | 0.171653  | -1.420955 | -1.580384 |
| H                                        | -0.915085 | 2.628989  | 0.586179  |
| H                                        | -0.395658 | 1.555930  | 1.868750  |
| H                                        | 1.417969  | 2.015806  | 0.129342  |
| H                                        | -0.630303 | 1.407288  | -1.889831 |
| H                                        | 1.053104  | 0.937631  | -2.169028 |
| H                                        | 2.702723  | -0.059761 | -1.282908 |
| H                                        | 2.689311  | -1.574959 | -0.377795 |
| H                                        | 3.224906  | -0.081958 | 0.402094  |
| H                                        | 1.103437  | -1.966335 | 1.495281  |
| H                                        | -0.093436 | -0.776108 | 1.987918  |
| H                                        | 1.620090  | -0.469103 | 2.276531  |
| C                                        | -1.789756 | 0.635075  | 0.456566  |
| H                                        | -2.507133 | 1.129792  | -0.207747 |
| H                                        | -2.361642 | 0.335224  | 1.336705  |
| O                                        | -2.070180 | -1.618647 | -0.339036 |
| Rotational constants (GHz):              | 1.9181100 | 1.2830900 | 1.1535800 |
| Vibrational harmonic frequencies (cm-1): |           |           |           |
| 85.9999                                  | 164.9212  | 189.9077  |           |
| 208.2671                                 | 232.2345  | 279.5665  |           |
| 366.3380                                 | 384.3323  | 413.4705  |           |
| 429.9263                                 | 471.1144  | 485.9213  |           |
| 548.8573                                 | 616.9042  | 648.5250  |           |
| 753.1696                                 | 786.6555  | 832.5946  |           |

|           |           |           |
|-----------|-----------|-----------|
| 869.3926  | 887.5725  | 928.2693  |
| 944.3719  | 956.4748  | 968.1896  |
| 1002.2234 | 1013.9088 | 1040.8654 |
| 1070.8278 | 1091.5440 | 1122.9491 |
| 1166.2433 | 1201.3653 | 1210.2016 |
| 1220.4881 | 1234.2511 | 1251.4413 |
| 1263.6064 | 1276.6922 | 1306.6882 |
| 1313.3687 | 1336.1077 | 1368.9091 |
| 1407.4821 | 1425.7038 | 1459.5949 |
| 1487.5639 | 1487.8658 | 1503.2964 |
| 1506.5423 | 1516.1955 | 1524.8407 |
| 1796.0950 | 3020.2690 | 3025.9812 |
| 3029.8781 | 3037.6760 | 3051.9582 |
| 3061.0247 | 3066.3834 | 3075.2140 |
| 3081.9355 | 3090.1128 | 3093.3367 |
| 3103.3041 | 3105.7405 | 3125.2619 |

Zero-point correction (Hartree): 0.211933

**TS1**

-----  
 E(RB+HF-LYP/6-311G(d,p)) (Hartree): -616.23161984  
 Electronic state : 1-A  
 Cartesian coordinates (Angs):

|   |           |           |           |
|---|-----------|-----------|-----------|
| C | -1.905835 | 0.397187  | -0.186328 |
| C | -0.442479 | 0.268177  | -0.797198 |
| C | 0.547708  | 0.335181  | 0.327608  |
| C | -1.007251 | -1.417522 | 1.388240  |
| C | -1.776921 | -1.141961 | 0.089722  |
| C | -0.786483 | -1.216713 | -1.104787 |
| C | -2.940167 | 0.708589  | -1.276747 |
| C | -2.139161 | 1.351394  | 0.985439  |
| H | -0.175285 | 0.935981  | -1.617907 |
| H | -0.894755 | -2.497679 | 1.517882  |
| H | -1.584925 | -1.061443 | 2.245950  |
| H | -2.697883 | -1.729687 | 0.040664  |
| H | 0.035941  | -1.929182 | -1.042651 |
| H | -1.283947 | -1.332854 | -2.065761 |
| H | -2.839385 | 0.073994  | -2.158230 |
| H | -2.849693 | 1.749027  | -1.604386 |
| H | -3.953258 | 0.571905  | -0.884453 |
| H | -2.047018 | 2.390679  | 0.653589  |
| H | -1.439228 | 1.212130  | 1.809871  |
| H | -3.151713 | 1.222679  | 1.382269  |
| C | 0.404301  | -0.751891 | 1.378098  |
| H | 1.162248  | -1.514409 | 1.172377  |
| H | 0.651029  | -0.350680 | 2.364462  |
| C | 1.339628  | 1.438850  | 0.551248  |
| H | 1.778038  | 1.620984  | 1.523784  |
| H | 1.345027  | 2.259218  | -0.153143 |
| O | 3.354329  | 0.883586  | -0.098735 |
| O | 3.194197  | -0.391613 | -0.251026 |
| O | 2.224570  | -0.673025 | -1.064750 |

Rotational constants (GHz): 1.4643300 0.5377000 0.5263400  
 Vibrational harmonic frequencies (cm-1):

|           |           |           |
|-----------|-----------|-----------|
| -177.3435 | 50.8271   | 82.8131   |
| 108.1357  | 174.5628  | 182.6097  |
| 189.6840  | 207.9155  | 219.0210  |
| 238.4962  | 285.4889  | 369.3563  |
| 386.6583  | 397.6937  | 415.9949  |
| 454.0794  | 461.5938  | 487.8041  |
| 547.4425  | 621.7808  | 654.9246  |
| 743.2877  | 755.1304  | 783.0061  |
| 804.2428  | 826.1306  | 852.5981  |
| 887.7600  | 919.9734  | 925.6735  |
| 945.7836  | 954.6411  | 968.0934  |
| 984.8369  | 1005.5785 | 1029.9581 |

|           |           |           |
|-----------|-----------|-----------|
| 1061.1866 | 1070.8719 | 1075.4177 |
| 1090.9183 | 1103.5351 | 1119.4657 |
| 1164.6260 | 1204.1938 | 1220.0317 |
| 1232.6136 | 1236.2002 | 1259.6345 |
| 1280.4786 | 1289.7581 | 1311.0187 |
| 1312.6887 | 1347.0833 | 1368.2404 |
| 1405.9370 | 1424.7222 | 1439.8192 |
| 1475.9324 | 1486.2453 | 1489.8766 |
| 1504.8642 | 1507.2592 | 1515.8327 |
| 1523.5079 | 1562.1857 | 3018.9350 |
| 3024.7990 | 3031.0859 | 3038.4680 |
| 3051.2367 | 3059.4232 | 3070.4579 |
| 3075.8267 | 3077.3082 | 3077.9402 |
| 3084.4362 | 3110.0915 | 3111.9009 |
| 3133.0307 | 3154.5411 | 3248.0456 |

Zero-point correction (Hartree): 0.244619

**TS2**

-----  
 E(RB+HF-LYP/6-311G(d,p)) (Hartree): -616.23267133

Electronic state : 1-A

Cartesian coordinates (Angs):

|   |           |           |           |
|---|-----------|-----------|-----------|
| C | 1.869942  | -0.475739 | -0.137461 |
| C | 0.374650  | -0.412910 | -0.686743 |
| C | -0.541113 | -0.176749 | 0.478535  |
| C | 1.134511  | 1.690530  | 1.022740  |
| C | 1.815161  | 1.089981  | -0.215475 |
| C | 0.758039  | 0.941115  | -1.344769 |
| C | 2.820350  | -1.080845 | -1.179716 |
| C | 2.138284  | -1.148297 | 1.208667  |
| H | 0.039532  | -1.238902 | -1.318031 |
| H | 1.076101  | 2.776930  | 0.910118  |
| H | 1.745848  | 1.504130  | 1.910438  |
| H | 2.752995  | 1.603644  | -0.444869 |
| H | -0.030205 | 1.690429  | -1.410530 |
| H | 1.200735  | 0.807847  | -2.329941 |
| H | 2.694947  | -0.654454 | -2.176008 |
| H | 2.664185  | -2.161418 | -1.258394 |
| H | 3.860499  | -0.918491 | -0.878778 |
| H | 1.988884  | -2.230171 | 1.131188  |
| H | 1.495131  | -0.788775 | 2.012159  |
| H | 3.176915  | -0.981975 | 1.513381  |
| C | -0.302233 | 1.119501  | 1.223933  |
| H | -1.039666 | 1.834547  | 0.846323  |
| H | -0.529109 | 0.990899  | 2.285218  |
| C | -1.346173 | -1.167921 | 0.993230  |
| H | -1.744327 | -1.091604 | 1.995870  |
| H | -1.394089 | -2.140979 | 0.520699  |
| O | -3.355574 | -0.666134 | 0.332438  |
| O | -3.105565 | -0.263201 | -0.869973 |
| O | -2.324722 | 0.770128  | -0.898276 |

Rotational constants (GHz): 1.4162300 0.5377000 0.5313200

Vibrational harmonic frequencies (cm-1):

|           |           |           |
|-----------|-----------|-----------|
| -167.5415 | 52.4461   | 81.9667   |
| 104.5064  | 170.1445  | 175.3639  |
| 190.7783  | 203.4864  | 223.0274  |
| 232.1781  | 287.8607  | 371.7477  |
| 386.5251  | 391.6890  | 415.4692  |
| 447.5430  | 454.6983  | 485.9546  |
| 541.8169  | 617.9576  | 654.1551  |
| 740.1680  | 750.6274  | 786.9818  |
| 809.7376  | 825.3718  | 849.6158  |
| 889.6083  | 918.0631  | 938.7364  |
| 948.1895  | 952.4800  | 966.2371  |
| 981.9726  | 1004.9176 | 1029.1101 |
| 1058.0932 | 1074.1490 | 1077.3091 |
| 1095.2096 | 1102.2771 | 1119.5873 |



|           |           |           |
|-----------|-----------|-----------|
| 1162.8555 | 1202.8186 | 1216.2173 |
| 1223.4094 | 1236.2319 | 1255.7339 |
| 1278.2091 | 1289.8976 | 1309.1858 |
| 1311.1568 | 1344.5115 | 1366.5150 |
| 1404.5516 | 1423.4094 | 1441.0018 |
| 1477.9190 | 1485.8001 | 1487.2541 |
| 1503.7797 | 1504.5918 | 1515.7638 |
| 1524.1597 | 1564.2801 | 3018.3699 |
| 3023.9730 | 3031.6574 | 3039.1063 |
| 3051.3329 | 3060.8629 | 3065.7794 |
| 3070.4699 | 3077.1998 | 3078.7142 |
| 3086.0266 | 3106.3583 | 3110.1708 |
| 3136.3154 | 3150.6557 | 3242.7015 |

Zero-point correction (Hartree): 0.244417

**TS1b**

-----

E(RB+HF-LYP/6-311G(d,p)) (Hartree): -616.22804754

Electronic state : 1-A

Cartesian coordinates (Angs):

|   |           |           |           |
|---|-----------|-----------|-----------|
| C | -1.508484 | 0.744780  | -0.044440 |
| C | -0.505656 | -0.036631 | -0.982998 |
| C | 0.575504  | -0.798429 | -0.272784 |
| C | -1.357506 | -1.430959 | 1.305456  |
| C | -2.145651 | -0.659341 | 0.234458  |
| C | -1.653636 | -1.102170 | -1.165270 |
| C | -2.430953 | 1.644560  | -0.884797 |
| C | -1.010902 | 1.573633  | 1.139669  |
| H | -0.133492 | 0.479118  | -1.870770 |
| H | -1.697652 | -2.471316 | 1.298308  |
| H | -1.588778 | -1.036425 | 2.298458  |
| H | -3.220153 | -0.691333 | 0.436758  |
| H | -1.344288 | -2.142655 | -1.285615 |
| H | -2.334182 | -0.841065 | -1.973649 |
| H | -2.847497 | 1.148033  | -1.762429 |
| H | -1.882667 | 2.525962  | -1.231338 |
| H | -3.269163 | 1.996037  | -0.275167 |
| H | -0.446295 | 2.441564  | 0.793346  |
| H | -0.365052 | 1.026368  | 1.821896  |
| H | -1.871807 | 1.937409  | 1.711696  |
| C | 0.184657  | -1.386306 | 1.066941  |
| H | 0.618860  | -2.384405 | 1.165434  |
| H | 0.673666  | -0.779045 | 1.834551  |
| C | 1.697050  | -1.233023 | -0.938316 |
| H | 2.270036  | -2.071085 | -0.566120 |
| H | 1.890854  | -0.921181 | -1.956940 |
| O | 3.388193  | -0.048431 | -0.187923 |
| O | 2.836058  | 1.115981  | -0.139183 |
| O | 1.835885  | 1.168367  | 0.678865  |

Rotational constants (GHz): 1.2788700 0.6077200 0.5386500

Vibrational harmonic frequencies (cm-1):

|           |           |           |
|-----------|-----------|-----------|
| -143.6485 | 55.9911   | 82.4246   |
| 116.1968  | 155.5841  | 174.3374  |
| 204.1055  | 205.6243  | 227.0268  |
| 257.3910  | 278.1896  | 327.8356  |
| 392.6187  | 410.6087  | 418.7186  |
| 433.5560  | 447.9675  | 509.3129  |
| 552.5129  | 598.4669  | 664.7239  |
| 741.6721  | 761.6968  | 785.2372  |
| 804.8752  | 832.1350  | 856.8432  |
| 878.2022  | 916.3157  | 923.8573  |
| 937.7890  | 950.7406  | 966.8025  |
| 992.2463  | 1005.5465 | 1019.0724 |
| 1059.1341 | 1063.3259 | 1085.2632 |
| 1105.2851 | 1106.8078 | 1130.4994 |
| 1161.0047 | 1206.4264 | 1206.7946 |
| 1228.2649 | 1237.9483 | 1257.1450 |

|           |           |           |
|-----------|-----------|-----------|
| 1273.3116 | 1295.6546 | 1307.2589 |
| 1310.3316 | 1343.3383 | 1371.3082 |
| 1406.6041 | 1427.2891 | 1442.1442 |
| 1475.1173 | 1486.0610 | 1490.5240 |
| 1504.0647 | 1507.4212 | 1515.4808 |
| 1522.0735 | 1565.5584 | 3023.0990 |
| 3028.8311 | 3029.4401 | 3039.5096 |
| 3047.8698 | 3058.9169 | 3060.9997 |
| 3070.3281 | 3077.1286 | 3079.0802 |
| 3095.1959 | 3103.5091 | 3125.8908 |
| 3150.3408 | 3151.7106 | 3243.6554 |

Zero-point correction (Hartree): 0.244591

**TS2b**

-----  
 E(RB+HF-LYP/6-311G(d,p)) (Hartree): -616.22692343  
 Electronic state : 1-A  
 Cartesian coordinates (Angs):

|   |           |           |           |
|---|-----------|-----------|-----------|
| C | -1.547816 | 0.708264  | -0.055880 |
| C | -0.563486 | -0.088319 | -1.001971 |
| C | 0.591625  | -0.746730 | -0.305978 |
| C | -1.224362 | -1.364802 | 1.416871  |
| C | -2.102945 | -0.700519 | 0.344899  |
| C | -1.666556 | -1.212023 | -1.050214 |
| C | -2.558297 | 1.509838  | -0.895008 |
| C | -1.029288 | 1.629140  | 1.048123  |
| H | -0.260283 | 0.386575  | -1.936445 |
| H | -1.519345 | -2.415402 | 1.501097  |
| H | -1.415950 | -0.910282 | 2.392396  |
| H | -3.162122 | -0.765181 | 0.610426  |
| H | -1.315635 | -2.243758 | -1.121784 |
| H | -2.402854 | -1.036077 | -1.832177 |
| H | -3.010042 | 0.933246  | -1.703505 |
| H | -2.069934 | 2.381224  | -1.341698 |
| H | -3.368991 | 1.875910  | -0.257212 |
| H | -0.588447 | 2.533296  | 0.621917  |
| H | -0.267987 | 1.178902  | 1.679781  |
| H | -1.866911 | 1.933897  | 1.685689  |
| C | 0.299755  | -1.280783 | 1.085045  |
| H | 0.769719  | -2.261188 | 1.197854  |
| H | 0.805434  | -0.634968 | 1.810403  |
| C | 1.698309  | -1.172162 | -1.002884 |
| H | 2.322831  | -1.969236 | -0.621180 |
| H | 1.832930  | -0.894207 | -2.038970 |
| O | 3.395070  | 0.132265  | -0.470618 |
| O | 2.864131  | 0.779445  | 0.514286  |
| O | 1.757793  | 1.365269  | 0.188256  |

Rotational constants (GHz): 1.3113800 0.6019500 0.5420800  
 Vibrational harmonic frequencies (cm-1):

|           |           |           |
|-----------|-----------|-----------|
| -159.6751 | 49.9984   | 71.8014   |
| 110.5106  | 162.9702  | 177.3190  |
| 188.8093  | 208.4342  | 224.5969  |
| 256.9216  | 266.8734  | 326.7442  |
| 389.1313  | 408.8778  | 413.0818  |
| 439.4615  | 453.4411  | 508.2520  |
| 554.9766  | 596.6099  | 664.5727  |
| 742.3727  | 758.6451  | 780.0040  |
| 799.3404  | 829.9243  | 855.9940  |
| 875.4127  | 913.7819  | 923.1139  |
| 925.3299  | 951.4022  | 967.1080  |
| 989.7107  | 1004.9966 | 1018.4426 |
| 1056.4493 | 1062.1674 | 1080.2392 |
| 1097.1200 | 1106.7690 | 1129.0878 |
| 1160.0724 | 1205.5916 | 1207.1231 |
| 1228.6668 | 1237.7803 | 1256.4543 |
| 1272.3944 | 1293.6702 | 1307.7355 |
| 1311.6148 | 1343.8048 | 1370.0247 |

|           |           |           |
|-----------|-----------|-----------|
| 1406.4711 | 1428.3622 | 1440.5955 |
| 1472.5370 | 1481.5326 | 1488.1901 |
| 1502.4751 | 1503.9504 | 1510.5678 |
| 1517.7226 | 1562.2267 | 3021.7642 |
| 3027.7016 | 3027.7671 | 3032.4468 |
| 3047.1499 | 3057.8736 | 3060.8410 |
| 3075.2095 | 3077.9218 | 3081.2467 |
| 3089.7274 | 3102.2853 | 3126.2735 |
| 3150.4213 | 3155.3363 | 3248.7033 |

Zero-point correction (Hartree): 0.244295

**TS3**

-----  
 E(RB+HF-LYP/6-311G(d,p)) (Hartree): -616.31233620

Electronic state : 1-A

Cartesian coordinates (Angs):

|   |           |           |           |
|---|-----------|-----------|-----------|
| C | 1.576585  | -0.607992 | 0.035642  |
| C | 0.189675  | -0.414499 | -0.686241 |
| C | -0.843464 | 0.310703  | 0.186446  |
| C | 1.236597  | 1.875646  | 0.570060  |
| C | 1.859634  | 0.869262  | -0.404857 |
| C | 0.874659  | 0.650620  | -1.583174 |
| C | 2.451864  | -1.614783 | -0.727644 |
| C | 1.653861  | -0.960914 | 1.524761  |
| H | -0.265191 | -1.286591 | -1.159112 |
| H | 1.291572  | 2.871211  | 0.120019  |
| H | 1.827682  | 1.921206  | 1.489457  |
| H | 2.896949  | 1.131534  | -0.632048 |
| H | 0.258336  | 1.496920  | -1.891064 |
| H | 1.342521  | 0.221059  | -2.467314 |
| H | 2.474326  | -1.431747 | -1.802732 |
| H | 2.084098  | -2.634267 | -0.573684 |
| H | 3.483278  | -1.575106 | -0.362730 |
| H | 1.313968  | -1.987373 | 1.698694  |
| H | 1.072463  | -0.303031 | 2.171218  |
| H | 2.693862  | -0.908125 | 1.863174  |
| C | -0.247642 | 1.545477  | 0.917457  |
| H | -0.891602 | 2.392789  | 0.679199  |
| H | -0.349310 | 1.391885  | 1.994570  |
| C | -1.656080 | -0.633396 | 1.083019  |
| H | -2.242371 | -0.068837 | 1.817953  |
| H | -1.058316 | -1.405398 | 1.565766  |
| O | -2.487056 | -1.304339 | 0.158004  |
| O | -2.912921 | -0.256493 | -0.761467 |
| O | -1.913323 | 0.817472  | -0.647059 |

Rotational constants (GHz): 1.3383600 0.6741200 0.6191100

Vibrational harmonic frequencies (cm-1):

|           |           |           |
|-----------|-----------|-----------|
| -134.4542 | 76.3239   | 151.6061  |
| 185.5803  | 196.4405  | 216.9693  |
| 230.7660  | 275.0166  | 281.1044  |
| 326.7944  | 363.9307  | 386.8890  |
| 405.5295  | 426.0666  | 474.5450  |
| 500.8316  | 567.0629  | 627.1931  |
| 698.5419  | 706.8892  | 761.9034  |
| 772.4180  | 782.5959  | 827.6472  |
| 852.7997  | 880.3800  | 886.6426  |
| 924.2557  | 929.2689  | 952.9042  |
| 961.3476  | 968.9912  | 992.0600  |
| 1021.7666 | 1030.6006 | 1038.4105 |
| 1054.3385 | 1069.5159 | 1119.2704 |
| 1137.1749 | 1155.1210 | 1183.4072 |
| 1208.5161 | 1221.3366 | 1235.3794 |
| 1244.2408 | 1257.7539 | 1264.6431 |
| 1283.7911 | 1293.8217 | 1314.1513 |
| 1341.6369 | 1350.8859 | 1371.4259 |
| 1380.1250 | 1405.9477 | 1425.1002 |
| 1485.0681 | 1486.7510 | 1491.0258 |

|           |           |           |
|-----------|-----------|-----------|
| 1494.9950 | 1509.0254 | 1510.6277 |
| 1518.8813 | 1524.5232 | 3016.7358 |
| 3018.5064 | 3024.5041 | 3029.5893 |
| 3047.3163 | 3052.1126 | 3061.8730 |
| 3068.2152 | 3070.4120 | 3076.5427 |
| 3083.2136 | 3098.5317 | 3108.3690 |
| 3113.3922 | 3126.0703 | 3136.3188 |

Zero-point correction (Hartree): 0.248667

**TS4**

-----  
 E(RB+HF-LYP/6-311G(d,p)) (Hartree): -616.29355387

Electronic state : 1-A

Cartesian coordinates (Angs):

|   |           |           |           |
|---|-----------|-----------|-----------|
| C | 1.532253  | -0.621590 | -0.014840 |
| C | 0.137544  | -0.346460 | -0.695806 |
| C | -0.829194 | 0.401199  | 0.200558  |
| C | 1.251257  | 1.817037  | 0.738156  |
| C | 1.842815  | 0.882649  | -0.329216 |
| C | 0.848661  | 0.783962  | -1.515544 |
| C | 2.361698  | -1.578435 | -0.888909 |
| C | 1.652961  | -1.113010 | 1.431558  |
| H | -0.358690 | -1.157170 | -1.222415 |
| H | 1.268401  | 2.839443  | 0.349534  |
| H | 1.878757  | 1.813401  | 1.633591  |
| H | 2.882088  | 1.144152  | -0.546566 |
| H | 0.255457  | 1.668186  | -1.753910 |
| H | 1.296191  | 0.406924  | -2.432674 |
| H | 2.358895  | -1.311890 | -1.946266 |
| H | 1.975391  | -2.598655 | -0.805252 |
| H | 3.402789  | -1.588014 | -0.551869 |
| H | 1.303757  | -2.146113 | 1.522790  |
| H | 1.109970  | -0.513165 | 2.160137  |
| H | 2.706992  | -1.105451 | 1.728091  |
| C | -0.212525 | 1.435402  | 1.131239  |
| H | -0.864071 | 2.311571  | 1.132395  |
| H | -0.235558 | 1.047493  | 2.151646  |
| C | -1.844114 | -0.916607 | 1.094920  |
| H | -2.290365 | -0.323499 | 1.911405  |
| H | -0.962363 | -1.504587 | 1.389930  |
| O | -2.606254 | -1.412168 | 0.204322  |
| O | -2.491109 | 0.058728  | -1.242101 |
| O | -1.924611 | 0.922502  | -0.416379 |

Rotational constants (GHz): 1.2449600 0.6834200 0.6328100

Vibrational harmonic frequencies (cm-1):

|           |           |           |
|-----------|-----------|-----------|
| -422.6775 | 100.8438  | 129.6326  |
| 156.7239  | 193.1104  | 204.6553  |
| 222.8194  | 243.7749  | 259.9140  |
| 276.7075  | 294.6310  | 380.8339  |
| 396.7466  | 407.1396  | 413.8020  |
| 470.1667  | 490.5509  | 537.0602  |
| 571.3188  | 590.4344  | 657.3026  |
| 678.0633  | 762.9983  | 793.6828  |
| 827.7964  | 864.9948  | 872.5598  |
| 880.5905  | 917.9161  | 946.7542  |
| 957.8171  | 966.5293  | 989.8906  |
| 1017.4066 | 1050.1336 | 1059.8550 |
| 1081.5771 | 1112.6415 | 1123.7527 |
| 1133.8562 | 1151.3764 | 1196.5744 |
| 1209.9242 | 1219.4778 | 1228.0210 |
| 1237.7720 | 1252.7309 | 1269.3977 |
| 1285.4943 | 1290.4497 | 1309.3503 |
| 1334.6974 | 1363.3700 | 1380.1627 |
| 1384.2359 | 1405.4299 | 1425.6263 |
| 1479.7100 | 1489.9469 | 1492.5680 |
| 1505.3348 | 1508.2467 | 1516.7540 |
| 1520.7190 | 1538.5330 | 2921.0038 |

|           |           |           |
|-----------|-----------|-----------|
| 2998.5683 | 3023.7825 | 3029.8178 |
| 3034.3157 | 3053.3237 | 3058.1513 |
| 3067.5458 | 3072.2999 | 3073.2599 |
| 3083.7154 | 3094.6601 | 3110.3000 |
| 3130.6441 | 3131.2029 | 3140.2220 |

Zero-point correction (Hartree): 0.246169

**TS5**

-----  
 E(RB+HF-LYP/6-311G(d,p)) (Hartree): -616.29215673

Electronic state : 1-A

Cartesian coordinates (Angs):

|   |           |           |           |
|---|-----------|-----------|-----------|
| C | -1.725611 | 0.476404  | -0.078094 |
| C | -0.523269 | -0.018215 | -0.970412 |
| C | 0.775381  | -0.126190 | -0.208420 |
| C | -0.756020 | -1.238504 | 1.554745  |
| C | -1.783706 | -1.002164 | 0.438609  |
| C | -1.169913 | -1.444127 | -0.914541 |
| C | -2.931575 | 0.833224  | -0.963025 |
| C | -1.551059 | 1.599141  | 0.946522  |
| H | -0.373615 | 0.452005  | -1.943932 |
| H | -0.733252 | -2.307603 | 1.784980  |
| H | -1.081317 | -0.734706 | 2.468640  |
| H | -2.765717 | -1.395161 | 0.715087  |
| H | -0.484249 | -2.293185 | -0.906609 |
| H | -1.906083 | -1.595105 | -1.701406 |
| H | -3.137264 | 0.090913  | -1.735319 |
| H | -2.766508 | 1.792964  | -1.462501 |
| H | -3.831735 | 0.930149  | -0.348625 |
| H | -1.327835 | 2.549507  | 0.452244  |
| H | -0.768875 | 1.408465  | 1.680329  |
| H | -2.485491 | 1.734688  | 1.500526  |
| C | 0.687122  | -0.775688 | 1.175435  |
| H | 1.377147  | -1.622082 | 1.141506  |
| H | 1.104363  | -0.116918 | 1.936612  |
| C | 1.700535  | 1.513569  | -0.017744 |
| H | 1.067743  | 1.876717  | 0.801906  |
| H | 1.504454  | 1.993973  | -0.991105 |
| O | 2.894132  | 1.177652  | 0.276036  |
| O | 2.896537  | -0.762261 | -0.393991 |
| O | 1.743946  | -0.624057 | -1.028392 |

Rotational constants (GHz): 1.4093600 0.6289800 0.5820200

Vibrational harmonic frequencies (cm-1):

|           |           |           |
|-----------|-----------|-----------|
| -432.9360 | 68.6259   | 120.1531  |
| 143.9595  | 195.4171  | 209.4230  |
| 221.0322  | 254.4003  | 273.8864  |
| 294.7208  | 305.9608  | 328.7487  |
| 385.8820  | 407.7787  | 435.0478  |
| 461.9926  | 500.7382  | 545.1504  |
| 571.8808  | 592.5238  | 638.8640  |
| 694.2177  | 763.6042  | 790.0096  |
| 825.0751  | 863.2129  | 863.8608  |
| 883.4887  | 918.2790  | 941.3295  |
| 965.6638  | 970.6549  | 993.7189  |
| 1018.0333 | 1046.1533 | 1057.1072 |
| 1090.0014 | 1111.3725 | 1117.0428 |
| 1133.8235 | 1144.7904 | 1193.2495 |
| 1212.2066 | 1215.8614 | 1225.6473 |
| 1239.1762 | 1247.2557 | 1265.3432 |
| 1278.9868 | 1284.8186 | 1309.2690 |
| 1338.6156 | 1363.3293 | 1376.9841 |
| 1379.1752 | 1405.1605 | 1428.0331 |
| 1483.2490 | 1488.8310 | 1491.9657 |
| 1505.0873 | 1508.2780 | 1518.2077 |
| 1524.6073 | 1539.6987 | 2928.0775 |
| 3022.8674 | 3025.9327 | 3029.5754 |
| 3036.9124 | 3056.0411 | 3063.9498 |

|           |           |           |
|-----------|-----------|-----------|
| 3070.3308 | 3072.8232 | 3076.0504 |
| 3081.9426 | 3083.3806 | 3104.5388 |
| 3107.2153 | 3117.5248 | 3135.0736 |

Zero-point correction (Hartree): 0.246003

**TS6**

-----  
 E(RB+HF-LYP/6-311G(d,p)) (Hartree): -616.28565147

Electronic state : 1-A

Cartesian coordinates (Angs):

|   |           |           |           |
|---|-----------|-----------|-----------|
| C | 1.553827  | -0.682852 | 0.029057  |
| C | 0.286723  | -0.288069 | -0.818815 |
| C | -0.785903 | 0.535604  | -0.076879 |
| C | 1.330462  | 1.760673  | 0.805967  |
| C | 2.000172  | 0.802767  | -0.195006 |
| C | 1.177506  | 0.793145  | -1.508256 |
| C | 2.435704  | -1.673906 | -0.751812 |
| C | 1.451780  | -1.211015 | 1.464799  |
| H | -0.185812 | -1.049310 | -1.442120 |
| H | 1.464160  | 2.782044  | 0.437348  |
| H | 1.844148  | 1.708253  | 1.770665  |
| H | 3.075021  | 0.997167  | -0.256762 |
| H | 0.675278  | 1.717306  | -1.798521 |
| H | 1.728329  | 0.409374  | -2.365394 |
| H | 2.587124  | -1.387185 | -1.792919 |
| H | 1.983640  | -2.670945 | -0.747294 |
| H | 3.421886  | -1.755521 | -0.283595 |
| H | 1.007950  | -2.212488 | 1.481508  |
| H | 0.879877  | -0.574673 | 2.138784  |
| H | 2.455916  | -1.305569 | 1.890968  |
| C | -0.192298 | 1.485207  | 1.019664  |
| H | -0.772163 | 2.406364  | 0.961605  |
| H | -0.347258 | 1.082198  | 2.022365  |
| C | -1.818157 | -0.680839 | 0.969684  |
| H | -2.323764 | 0.055707  | 1.585706  |
| H | -1.177768 | -1.419376 | 1.436705  |
| O | -2.561042 | -1.209685 | 0.007152  |
| O | -3.346245 | -0.290670 | -0.528823 |
| O | -1.712145 | 1.021900  | -0.812014 |

Rotational constants (GHz): 1.3146600 0.6322700 0.5758900

Vibrational harmonic frequencies (cm-1):

|           |           |           |
|-----------|-----------|-----------|
| -412.6865 | 82.2169   | 113.1276  |
| 138.5679  | 191.6870  | 199.1611  |
| 224.3115  | 257.2482  | 274.1203  |
| 279.8422  | 313.5877  | 347.5553  |
| 393.6490  | 416.4969  | 433.5173  |
| 480.8582  | 496.3412  | 524.1468  |
| 566.2268  | 599.3017  | 614.8583  |
| 681.8909  | 740.7077  | 798.0163  |
| 821.3534  | 868.2570  | 874.9103  |
| 891.4757  | 923.1312  | 944.1810  |
| 961.9446  | 969.2703  | 986.5009  |
| 1004.9700 | 1031.1417 | 1045.2180 |
| 1063.6757 | 1100.8515 | 1105.6598 |
| 1129.8122 | 1156.0979 | 1161.1267 |
| 1211.3552 | 1221.1991 | 1228.1339 |
| 1234.6668 | 1250.3748 | 1258.6378 |
| 1270.5505 | 1282.3438 | 1309.5090 |
| 1309.6064 | 1339.9241 | 1366.9779 |
| 1403.1433 | 1414.2241 | 1425.2969 |
| 1478.6809 | 1486.8509 | 1489.9648 |
| 1494.9298 | 1507.0559 | 1513.6556 |
| 1519.5945 | 1527.4428 | 3017.8537 |
| 3024.2532 | 3028.0154 | 3046.3933 |
| 3051.3675 | 3064.2708 | 3066.2206 |
| 3070.2055 | 3075.7169 | 3083.5844 |
| 3107.5705 | 3110.4057 | 3114.9769 |

3124.9224                      3126.6808                      3247.1979  
Zero-point correction (Hartree): 0.246294

**TS7**

-----  
E(RB+HF-LYP/6-311G(d,p)) (Hartree): -616.28533649

Electronic state : 1-A

Cartesian coordinates (Angs):

|   |           |           |           |
|---|-----------|-----------|-----------|
| C | -1.656651 | 0.606026  | -0.028601 |
| C | -0.480631 | 0.108338  | -0.952609 |
| C | 0.780418  | -0.403444 | -0.206699 |
| C | -1.059406 | -1.529767 | 1.270689  |
| C | -1.958463 | -0.916834 | 0.184936  |
| C | -1.322677 | -1.182690 | -1.202501 |
| C | -2.740473 | 1.299872  | -0.873396 |
| C | -1.421057 | 1.477395  | 1.209400  |
| H | -0.195714 | 0.713027  | -1.815980 |
| H | -1.156541 | -2.617978 | 1.212690  |
| H | -1.424478 | -1.241559 | 2.260983  |
| H | -3.004509 | -1.198192 | 0.338131  |
| H | -0.762115 | -2.109207 | -1.333309 |
| H | -2.021157 | -1.074150 | -2.030799 |
| H | -2.989150 | 0.757621  | -1.786535 |
| H | -2.413012 | 2.303206  | -1.164490 |
| H | -3.661332 | 1.408737  | -0.291743 |
| H | -1.075601 | 2.477812  | 0.927845  |
| H | -0.711017 | 1.057139  | 1.920841  |
| H | -2.366443 | 1.609172  | 1.745748  |
| C | 0.447811  | -1.139546 | 1.127249  |
| H | 1.079652  | -2.027952 | 1.135968  |
| H | 0.757922  | -0.540663 | 1.985859  |
| C | 1.667614  | 1.226702  | 0.221057  |
| H | 1.215003  | 1.707689  | 1.078922  |
| H | 1.595610  | 1.701582  | -0.751839 |
| O | 2.864688  | 0.731146  | 0.515610  |
| O | 3.410403  | 0.176735  | -0.553294 |
| O | 1.674155  | -0.933205 | -0.953496 |

Rotational constants (GHz):    1.4090400            0.5995200            0.5603900

Vibrational harmonic frequencies (cm-1):

|           |           |           |
|-----------|-----------|-----------|
| -419.7762 | 80.5808   | 95.4138   |
| 138.2774  | 198.5876  | 202.7281  |
| 228.6149  | 257.9366  | 276.9722  |
| 286.1402  | 309.2929  | 347.8025  |
| 387.4237  | 414.9855  | 437.6845  |
| 483.7881  | 494.2449  | 518.2771  |
| 563.8347  | 596.4249  | 616.7673  |
| 673.1241  | 739.3182  | 795.5771  |
| 822.7505  | 868.1704  | 879.0460  |
| 888.4246  | 925.1707  | 947.2336  |
| 960.8158  | 968.5097  | 987.4938  |
| 1007.0741 | 1037.1428 | 1042.0369 |
| 1062.6471 | 1091.2122 | 1107.2941 |
| 1126.4588 | 1153.4281 | 1157.8857 |
| 1210.2951 | 1222.1144 | 1232.2232 |
| 1234.7444 | 1246.8983 | 1262.5532 |
| 1266.6481 | 1271.7504 | 1300.3114 |
| 1309.6634 | 1340.0959 | 1367.2631 |
| 1405.4776 | 1410.6722 | 1426.5496 |
| 1479.0475 | 1484.6873 | 1490.3115 |
| 1494.9454 | 1508.0946 | 1509.9240 |
| 1521.2163 | 1525.8951 | 3018.9833 |
| 3024.7457 | 3028.7571 | 3047.1800 |
| 3054.3151 | 3063.9418 | 3067.5767 |
| 3068.6235 | 3075.9780 | 3076.7051 |
| 3104.6011 | 3106.3970 | 3117.1425 |
| 3122.6446 | 3127.0182 | 3248.0502 |

Zero-point correction (Hartree): 0.246157

**TS8a**

-----  
E(RB+HF-LYP/6-311G(d,p)) (Hartree): -501.77253875  
Electronic state : 1-A  
Cartesian coordinates (Angs):  
C 1.273572 -0.460069 0.192857  
C 0.310868 -0.273940 -1.065689  
C -1.051036 -0.021703 -0.528113  
C -0.021040 1.621163 1.004709  
C 1.237326 1.111079 0.270665  
C 0.970904 1.122955 -1.261731  
C 2.646578 -0.992723 -0.237958  
C 0.782308 -1.284802 1.381946  
H 0.324718 -1.029150 -1.852338  
H -0.073991 2.709279 0.900467  
H 0.068782 1.418126 2.077387  
H 2.139974 1.605241 0.638856  
H 0.332517 1.916495 -1.654024  
H 1.880135 1.069144 -1.856434  
H 3.067464 -0.465441 -1.094896  
H 2.581512 -2.053733 -0.496664  
H 3.355850 -0.896659 0.590126  
H 0.715504 -2.342489 1.109407  
H -0.195584 -0.976757 1.751268  
H 1.493659 -1.203873 2.210160  
C -1.296516 0.970880 0.448186  
H -2.125917 1.645102 0.226951  
H -2.247666 0.134591 0.909610  
O -3.073326 -0.627879 0.140333  
O -1.981017 -0.907985 -0.726471  
Rotational constants (GHz): 1.8566600 0.9216500 0.8451200  
Vibrational harmonic frequencies (cm-1):  
-1581.0977 105.0884 180.0214  
189.4973 221.6918 249.7879  
284.1333 328.9738 373.0887  
386.5431 409.7663 425.3423  
451.6177 490.3905 580.2040  
623.3324 668.4177 718.3594  
776.0844 832.1420 848.7294  
860.4350 880.9817 894.0311  
934.9110 954.8126 966.6839  
984.7298 1000.2133 1022.4729  
1054.1435 1082.7441 1101.9412  
1119.0330 1158.6382 1197.3456  
1224.6254 1227.4124 1241.3406  
1249.5057 1287.3193 1294.8202  
1305.8112 1360.3376 1402.8120  
1407.1366 1427.0618 1442.7078  
1483.1946 1488.9808 1497.4644  
1504.2684 1515.2361 1519.2506  
1536.3780 1826.3800 3022.9843  
3024.1594 3030.0451 3052.7929  
3058.8835 3070.4637 3077.2612  
3083.9656 3091.1922 3097.7162  
3111.6883 3123.3575 3134.6584  
Zero-point correction (Hartree): 0.210907

**TS8b**

-----  
E(RB+HF-LYP/6-311G(d,p)) (Hartree): -501.77105442  
Electronic state : 1-A  
Cartesian coordinates (Angs):  
C 1.436868 -0.228847 0.271278  
C 0.231946 -0.903517 -0.489267  
C -1.053341 -0.401141 0.065806



|                                                           |           |           |           |
|-----------------------------------------------------------|-----------|-----------|-----------|
| C                                                         | -0.055928 | 1.863863  | 0.017268  |
| C                                                         | 1.101116  | 1.045520  | -0.591911 |
| C                                                         | 0.530399  | 0.087576  | -1.673385 |
| C                                                         | 2.776110  | -0.863196 | -0.132369 |
| C                                                         | 1.390051  | -0.135198 | 1.797090  |
| H                                                         | 0.223887  | -1.978785 | -0.671724 |
| H                                                         | -0.356894 | 2.637957  | -0.697052 |
| H                                                         | 0.290701  | 2.390152  | 0.911986  |
| H                                                         | 1.940453  | 1.687347  | -0.870865 |
| H                                                         | -0.325423 | 0.430199  | -2.256570 |
| H                                                         | 1.287102  | -0.308155 | -2.347627 |
| H                                                         | 2.896876  | -0.977401 | -1.210725 |
| H                                                         | 2.880568  | -1.854187 | 0.319870  |
| H                                                         | 3.604787  | -0.246421 | 0.228475  |
| H                                                         | 1.498759  | -1.129825 | 2.241348  |
| H                                                         | 0.465431  | 0.297338  | 2.177415  |
| H                                                         | 2.221110  | 0.476809  | 2.161828  |
| C                                                         | -1.255354 | 0.966495  | 0.357129  |
| H                                                         | -2.508055 | 0.771876  | -0.094966 |
| H                                                         | -1.744225 | 1.168267  | 1.311961  |
| O                                                         | -3.262412 | -0.343862 | 0.172596  |
| O                                                         | -2.110872 | -1.150450 | -0.039244 |
| Rotational constants (GHz): 2.0058600 0.8444100 0.8111700 |           |           |           |
| Vibrational harmonic frequencies (cm-1):                  |           |           |           |
| -1589.5130                                                | 112.1469  | 173.0987  |           |
| 193.8690                                                  | 211.9385  | 238.0334  |           |
| 274.3194                                                  | 312.3489  | 361.6315  |           |
| 386.3737                                                  | 419.5635  | 424.8920  |           |
| 459.0081                                                  | 486.0690  | 576.0493  |           |
| 611.5929                                                  | 679.1225  | 731.1056  |           |
| 801.8194                                                  | 813.2953  | 851.3533  |           |
| 862.1187                                                  | 886.8911  | 896.3314  |           |
| 932.9840                                                  | 942.1316  | 958.5462  |           |
| 968.6097                                                  | 1010.5532 | 1016.3956 |           |
| 1063.9885                                                 | 1086.5643 | 1090.0104 |           |
| 1124.5362                                                 | 1155.1323 | 1201.3516 |           |
| 1211.9143                                                 | 1228.7617 | 1242.3812 |           |
| 1250.0144                                                 | 1283.7633 | 1293.5306 |           |
| 1310.5460                                                 | 1360.5450 | 1400.5812 |           |
| 1404.9248                                                 | 1424.4123 | 1444.5432 |           |
| 1484.7749                                                 | 1487.6985 | 1496.8138 |           |
| 1503.9219                                                 | 1514.4751 | 1519.0265 |           |
| 1537.7494                                                 | 1825.1573 | 3022.7187 |           |
| 3023.6363                                                 | 3028.8828 | 3052.8287 |           |
| 3059.6552                                                 | 3073.2309 | 3074.9777 |           |
| 3082.8547                                                 | 3089.7976 | 3096.5912 |           |
| 3105.3446                                                 | 3125.1160 | 3133.9524 |           |
| Zero-point correction (Hartree): 0.210751                 |           |           |           |

#### TS9a

-----

E(RB+HF-LYP/6-311G(d,p)) (Hartree): -501.76686709

Electronic state : 1-A

Cartesian coordinates (Angs):

|   |           |           |           |
|---|-----------|-----------|-----------|
| C | 1.135363  | -0.486566 | 0.184003  |
| C | -0.051861 | -0.414449 | -0.863219 |
| C | -1.262280 | 0.151965  | -0.221182 |
| C | 0.357476  | 1.908109  | 0.718351  |
| C | 1.326945  | 1.045550  | -0.103282 |
| C | 0.703556  | 0.807313  | -1.501361 |
| C | 2.296673  | -1.326262 | -0.364105 |
| C | 0.818923  | -0.958789 | 1.602552  |
| H | -0.292432 | -1.298054 | -1.446612 |
| H | 0.447517  | 2.949328  | 0.396867  |
| H | 0.633807  | 1.882667  | 1.775117  |
| H | 2.345993  | 1.436730  | -0.049061 |
| H | 0.101632  | 1.609933  | -1.934553 |
| H | 1.418847  | 0.469821  | -2.248845 |

|                                                       |           |           |           |
|-------------------------------------------------------|-----------|-----------|-----------|
| H                                                     | 2.585216  | -1.053711 | -1.380739 |
| H                                                     | 2.030042  | -2.386799 | -0.364986 |
| H                                                     | 3.177408  | -1.203850 | 0.274089  |
| H                                                     | 0.524158  | -2.010128 | 1.587771  |
| H                                                     | 0.002415  | -0.413288 | 2.075336  |
| H                                                     | 1.705149  | -0.858990 | 2.238202  |
| C                                                     | -1.112146 | 1.434831  | 0.546868  |
| H                                                     | -1.733357 | 2.178423  | 0.031572  |
| H                                                     | -1.610994 | 1.278429  | 1.508212  |
| O                                                     | -2.120220 | -1.661825 | 0.086941  |
| O                                                     | -2.456193 | -0.282015 | -0.393706 |
| Rotational constants (GHz):                           | 1.5685300 | 1.0781100 | 0.8929500 |
| Vibrational harmonic frequencies (cm <sup>-1</sup> ): |           |           |           |
| -400.7046                                             | 88.1588   |           | 143.7058  |
| 173.3245                                              | 196.3544  |           | 221.0109  |
| 259.0001                                              | 302.4251  |           | 348.7813  |
| 383.1132                                              | 394.5896  |           | 417.0939  |
| 450.0622                                              | 463.4746  |           | 522.6492  |
| 603.3305                                              | 641.5945  |           | 757.4344  |
| 764.9232                                              | 779.4165  |           | 832.7306  |
| 851.9104                                              | 879.7280  |           | 909.7187  |
| 947.2970                                              | 959.3676  |           | 961.8609  |
| 996.0739                                              | 1013.6604 |           | 1037.9685 |
| 1063.0605                                             | 1096.5375 |           | 1122.3460 |
| 1160.5889                                             | 1201.8188 |           | 1204.1757 |
| 1226.8542                                             | 1231.5242 |           | 1248.2620 |
| 1266.4128                                             | 1284.0362 |           | 1296.8282 |
| 1309.8051                                             | 1343.6041 |           | 1373.9848 |
| 1407.7574                                             | 1426.5434 |           | 1439.7600 |
| 1481.7004                                             | 1485.8737 |           | 1502.0669 |
| 1503.8858                                             | 1511.3926 |           | 1517.0806 |
| 1523.6110                                             | 3023.4467 |           | 3025.2056 |
| 3031.3283                                             | 3043.6442 |           | 3055.0603 |
| 3060.6537                                             | 3063.3093 |           | 3082.0405 |
| 3084.5200                                             | 3098.6054 |           | 3103.4955 |
| 3120.5119                                             | 3126.7591 |           | 3151.8863 |
| Zero-point correction (Hartree):                      | 0.213238  |           |           |

### TS9b

-----  
 E(RB+HF-LYP/6-311G(d,p)) (Hartree): -501.76602127  
 Electronic state : 1-A  
 Cartesian coordinates (Angs):

|   |           |           |           |
|---|-----------|-----------|-----------|
| C | 1.252406  | -0.382946 | 0.248433  |
| C | -0.128977 | -0.766367 | -0.448740 |
| C | -1.202487 | 0.022122  | 0.207592  |
| C | 0.400522  | 2.004767  | -0.085663 |
| C | 1.241945  | 0.871519  | -0.690098 |
| C | 0.367076  | 0.056353  | -1.681576 |
| C | 2.340549  | -1.392937 | -0.139497 |
| C | 1.286858  | -0.195776 | 1.766996  |
| H | -0.404049 | -1.809972 | -0.557708 |
| H | 0.322844  | 2.824572  | -0.804615 |
| H | 0.900491  | 2.410912  | 0.797290  |
| H | 2.210566  | 1.239851  | -1.037662 |
| H | -0.394229 | 0.589875  | -2.253020 |
| H | 0.946405  | -0.559856 | -2.365595 |
| H | 2.384677  | -1.587724 | -1.211841 |
| H | 2.173758  | -2.348338 | 0.366241  |
| H | 3.321458  | -1.018121 | 0.170350  |
| H | 1.125388  | -1.155048 | 2.267638  |
| H | 0.534966  | 0.497488  | 2.146820  |
| H | 2.266696  | 0.178511  | 2.080605  |
| C | -1.020014 | 1.507308  | 0.290014  |
| H | -1.774050 | 1.896013  | -0.408647 |
| H | -1.359801 | 1.843539  | 1.274613  |
| O | -2.697295 | -1.202181 | -0.440402 |

|                                                       |           |           |           |           |
|-------------------------------------------------------|-----------|-----------|-----------|-----------|
| O                                                     | -2.238003 | -0.466064 | 0.781748  |           |
| Rotational constants (GHz):                           | 1.6501200 | 0.9731200 | 0.8812000 |           |
| Vibrational harmonic frequencies (cm <sup>-1</sup> ): |           |           |           |           |
| -389.6622                                             |           | 85.2758   |           | 166.9613  |
| 188.4174                                              |           | 196.9153  |           | 219.2875  |
| 258.0742                                              |           | 274.9821  |           | 367.6829  |
| 384.6214                                              |           | 408.1570  |           | 419.5284  |
| 451.0731                                              |           | 468.2691  |           | 508.0700  |
| 586.2625                                              |           | 657.7511  |           | 752.8247  |
| 760.0991                                              |           | 785.7280  |           | 824.2281  |
| 851.4174                                              |           | 887.4595  |           | 920.0594  |
| 944.9598                                              |           | 956.5159  |           | 962.9929  |
| 992.9948                                              |           | 1014.5595 |           | 1048.3463 |
| 1066.1128                                             |           | 1090.6429 |           | 1119.7271 |
| 1155.7989                                             |           | 1193.8489 |           | 1206.4559 |
| 1224.7042                                             |           | 1233.7971 |           | 1254.0363 |
| 1261.5414                                             |           | 1286.1488 |           | 1301.1993 |
| 1308.2309                                             |           | 1346.2402 |           | 1373.6407 |
| 1406.2365                                             |           | 1425.3216 |           | 1436.8666 |
| 1486.1209                                             |           | 1487.6383 |           | 1503.8406 |
| 1505.5792                                             |           | 1514.6728 |           | 1521.6301 |
| 1526.8967                                             |           | 3010.1291 |           | 3023.2975 |
| 3028.9516                                             |           | 3042.9455 |           | 3058.4374 |
| 3061.5961                                             |           | 3072.7842 |           | 3078.7617 |
| 3080.3012                                             |           | 3084.8545 |           | 3107.5879 |
| 3109.9467                                             |           | 3134.8205 |           | 3164.2041 |
| Zero-point correction (Hartree): 0.213325             |           |           |           |           |

**TS10a**

-----  
 E(RB+HF-LYP/6-311G(d,p)) (Hartree): -501.76365808  
 Electronic state : 1-A  
 Cartesian coordinates (Angs):

|                                                       |           |           |           |          |
|-------------------------------------------------------|-----------|-----------|-----------|----------|
| C                                                     | 1.303621  | -0.399670 | 0.145274  |          |
| C                                                     | 0.137651  | -0.390628 | -0.963041 |          |
| C                                                     | -1.128311 | -0.223050 | -0.201856 |          |
| C                                                     | 0.062073  | 1.705871  | 0.920273  |          |
| C                                                     | 1.207567  | 1.163417  | 0.051093  |          |
| C                                                     | 0.688753  | 0.993997  | -1.403101 |          |
| C                                                     | 2.607385  | -0.950071 | -0.445450 |          |
| C                                                     | 1.037733  | -1.092442 | 1.481835  |          |
| H                                                     | 0.090250  | -1.224542 | -1.662196 |          |
| H                                                     | 0.013979  | 2.793240  | 0.818061  |          |
| H                                                     | 0.260422  | 1.498199  | 1.974904  |          |
| H                                                     | 2.134553  | 1.719961  | 0.210248  |          |
| H                                                     | -0.031881 | 1.723991  | -1.774381 |          |
| H                                                     | 1.486358  | 0.889150  | -2.135126 |          |
| H                                                     | 2.865943  | -0.508168 | -1.408427 |          |
| H                                                     | 2.540585  | -2.033365 | -0.579675 |          |
| H                                                     | 3.434413  | -0.750474 | 0.243469  |          |
| H                                                     | 0.981345  | -2.175884 | 1.343208  |          |
| H                                                     | 0.109981  | -0.780463 | 1.961673  |          |
| H                                                     | 1.858869  | -0.889275 | 2.176643  |          |
| C                                                     | -1.312211 | 1.100386  | 0.495048  |          |
| H                                                     | -1.801899 | 1.778664  | -0.206479 |          |
| H                                                     | -2.016835 | 0.964605  | 1.314868  |          |
| O                                                     | -3.101482 | -0.539554 | -0.357725 |          |
| O                                                     | -1.842474 | -1.267007 | 0.013070  |          |
| Rotational constants (GHz):                           | 1.8074300 | 0.9414700 | 0.8450500 |          |
| Vibrational harmonic frequencies (cm <sup>-1</sup> ): |           |           |           |          |
| -419.5221                                             |           | 101.2948  |           | 164.7713 |
| 180.5188                                              |           | 202.5537  |           | 222.6305 |
| 298.7254                                              |           | 311.6026  |           | 361.7476 |
| 383.2967                                              |           | 404.8371  |           | 426.0803 |
| 456.1875                                              |           | 492.6748  |           | 547.6329 |
| 605.1129                                              |           | 638.0405  |           | 746.6737 |
| 771.8051                                              |           | 790.7266  |           | 816.9863 |

|           |           |           |
|-----------|-----------|-----------|
| 844.6705  | 892.6449  | 919.4335  |
| 936.7202  | 954.1911  | 968.0617  |
| 998.6696  | 1015.0795 | 1048.7771 |
| 1070.0763 | 1075.1091 | 1102.2688 |
| 1157.8807 | 1186.8100 | 1202.2460 |
| 1226.7640 | 1230.3050 | 1242.7296 |
| 1259.3851 | 1281.0386 | 1305.5108 |
| 1314.4568 | 1339.6692 | 1364.6128 |
| 1409.0505 | 1428.0868 | 1456.8810 |
| 1482.8829 | 1487.0267 | 1501.4808 |
| 1505.2243 | 1515.3836 | 1521.8957 |
| 1525.6984 | 3024.9033 | 3031.1207 |
| 3042.4981 | 3061.2697 | 3063.9302 |
| 3076.9935 | 3081.3582 | 3082.0406 |
| 3088.0653 | 3110.0541 | 3110.4875 |
| 3118.9893 | 3125.0398 | 3138.1185 |

Zero-point correction (Hartree): 0.213805

### TS10b

-----  
 E(RB+HF-LYP/6-311G(d,p)) (Hartree): -501.76390577  
 Electronic state : 1-A  
 Cartesian coordinates (Angs):

|   |           |           |           |
|---|-----------|-----------|-----------|
| C | 1.166527  | -0.511367 | 0.151460  |
| C | 0.223400  | -0.111063 | -1.095330 |
| C | -1.140634 | 0.080948  | -0.545524 |
| C | -0.007271 | 1.521388  | 1.191872  |
| C | 1.229589  | 1.032949  | 0.416150  |
| C | 0.987742  | 1.248158  | -1.102920 |
| C | 2.502719  | -1.075916 | -0.348761 |
| C | 0.617312  | -1.442178 | 1.231300  |
| H | 0.222497  | -0.766382 | -1.966617 |
| H | 0.078048  | 2.593737  | 1.386604  |
| H | -0.060120 | 1.024976  | 2.163546  |
| H | 2.155974  | 1.413931  | 0.852850  |
| H | 0.437128  | 2.136576  | -1.415549 |
| H | 1.897572  | 1.180771  | -1.694221 |
| H | 2.988270  | -0.457711 | -1.104763 |
| H | 2.360390  | -2.074953 | -0.769713 |
| H | 3.192913  | -1.168456 | 0.495690  |
| H | 0.592994  | -2.470978 | 0.861044  |
| H | -0.398795 | -1.202141 | 1.539083  |
| H | 1.279498  | -1.418445 | 2.103708  |
| C | -1.306807 | 1.252823  | 0.386908  |
| H | -1.480957 | 2.107416  | -0.285421 |
| H | -2.187995 | 1.133445  | 1.005702  |
| O | -2.486656 | -1.109112 | 0.385161  |
| O | -2.102454 | -0.641668 | -0.995520 |

Rotational constants (GHz): 1.6732000 1.0243200 0.9047900  
 Vibrational harmonic frequencies (cm-1):

|           |           |           |
|-----------|-----------|-----------|
| -406.7588 | 114.7402  | 152.3029  |
| 184.2974  | 212.6542  | 231.8835  |
| 296.2246  | 346.7574  | 384.0634  |
| 390.8718  | 401.9466  | 434.9028  |
| 458.7119  | 485.3715  | 544.2952  |
| 608.5441  | 647.7435  | 732.8682  |
| 756.8214  | 793.1700  | 817.8399  |
| 848.9824  | 898.9368  | 922.7025  |
| 946.2275  | 963.6096  | 973.2309  |
| 999.6359  | 1016.1340 | 1047.6399 |
| 1069.8987 | 1078.1251 | 1100.5886 |
| 1158.8133 | 1186.0603 | 1205.4151 |
| 1222.2700 | 1233.9910 | 1246.6887 |
| 1261.0994 | 1281.2836 | 1309.9564 |
| 1316.0429 | 1341.4428 | 1368.1641 |
| 1410.5439 | 1434.0644 | 1463.9480 |
| 1477.5396 | 1490.3686 | 1499.9625 |

|           |           |           |
|-----------|-----------|-----------|
| 1506.5170 | 1512.1363 | 1521.3173 |
| 1530.0581 | 2975.4885 | 3021.5110 |
| 3030.4832 | 3046.0732 | 3063.1655 |
| 3075.2824 | 3080.2338 | 3085.1544 |
| 3087.8029 | 3100.8994 | 3111.2816 |
| 3134.7242 | 3137.9705 | 3180.8788 |

Zero-point correction (Hartree): 0.214080

### TS11

-----  
E(RB+HF-LYP/6-311G(d,p)) (Hartree): -501.75227547

Electronic state : 1-A

Cartesian coordinates (Angs):

|   |           |           |           |
|---|-----------|-----------|-----------|
| C | 0.961497  | -0.595915 | 0.234407  |
| C | -0.126148 | -0.257852 | -0.959272 |
| C | -1.149893 | 0.406342  | -0.252075 |
| C | 0.503787  | 1.913339  | 0.725849  |
| C | 1.409162  | 0.892502  | 0.000782  |
| C | 0.905406  | 0.774229  | -1.461818 |
| C | 1.991296  | -1.621762 | -0.244941 |
| C | 0.458097  | -1.014778 | 1.613627  |
| H | -1.088381 | -1.360355 | -1.053844 |
| H | 0.862990  | 2.923501  | 0.514931  |
| H | 0.554168  | 1.776932  | 1.808361  |
| H | 2.466513  | 1.117065  | 0.180055  |
| H | 0.528524  | 1.682919  | -1.938899 |
| H | 1.636712  | 0.320705  | -2.128650 |
| H | 2.377836  | -1.406922 | -1.241248 |
| H | 1.543224  | -2.618088 | -0.268494 |
| H | 2.840747  | -1.650267 | 0.447066  |
| H | -0.044338 | -1.982033 | 1.552998  |
| H | -0.248261 | -0.313272 | 2.059767  |
| H | 1.306090  | -1.112439 | 2.299828  |
| C | -0.994879 | 1.797876  | 0.248184  |
| H | -1.173224 | 2.498863  | -0.571881 |
| H | -1.715255 | 2.027102  | 1.035074  |
| O | -2.018207 | -1.652391 | -0.374159 |
| O | -2.181455 | -0.306059 | 0.108718  |

Rotational constants (GHz): 1.4568000 1.2331100 0.9339800

Vibrational harmonic frequencies (cm-1):

|            |           |           |
|------------|-----------|-----------|
| -1292.5706 | 135.1856  | 148.0091  |
| 176.1208   | 215.6515  | 235.2125  |
| 290.5763   | 302.3949  | 378.9110  |
| 385.6040   | 387.2888  | 432.2525  |
| 463.6500   | 498.3754  | 564.4285  |
| 624.0728   | 642.1219  | 682.4711  |
| 750.0659   | 802.1297  | 827.5495  |
| 851.8155   | 882.3892  | 889.2074  |
| 921.4171   | 945.4824  | 955.0406  |
| 984.9732   | 998.9605  | 1024.6189 |
| 1065.3482  | 1083.8633 | 1117.4390 |
| 1133.1236  | 1164.9627 | 1185.4441 |
| 1196.3115  | 1213.3075 | 1230.4375 |
| 1235.1036  | 1267.0258 | 1298.1554 |
| 1317.6482  | 1337.3818 | 1405.5279 |
| 1409.7532  | 1421.6588 | 1457.8942 |
| 1467.2275  | 1484.0033 | 1486.5163 |
| 1502.7460  | 1506.1232 | 1518.1317 |
| 1530.2868  | 1911.7937 | 3019.8565 |
| 3025.0738  | 3031.1118 | 3047.5082 |
| 3051.1737  | 3057.3771 | 3084.2896 |
| 3085.8545  | 3096.8875 | 3105.8572 |
| 3108.8085  | 3116.2566 | 3123.4349 |

Zero-point correction (Hartree): 0.210267

### TS12

-----  
E(UB+HF-LYP/6-311G(d,p)) (Hartree): -501.79103231

Electronic state : 1-A

Cartesian coordinates (Angs):

|   |           |           |           |
|---|-----------|-----------|-----------|
| C | 1.247471  | -0.309147 | 0.065357  |
| C | 0.037785  | -0.353299 | -0.931844 |
| C | -1.288766 | -0.347965 | -0.166567 |
| C | -0.104881 | 1.611410  | 1.090793  |
| C | 0.999816  | 1.242043  | 0.091977  |
| C | 0.379757  | 1.108301  | -1.328616 |
| C | 2.568217  | -0.666640 | -0.631481 |
| C | 1.164030  | -1.104492 | 1.371175  |
| H | 0.013806  | -1.136385 | -1.692077 |
| H | -0.265918 | 2.693073  | 1.069686  |
| H | 0.216589  | 1.365038  | 2.106451  |
| H | 1.878655  | 1.880210  | 0.216809  |
| H | -0.451436 | 1.767874  | -1.588086 |
| H | 1.118004  | 1.157261  | -2.126816 |
| H | 2.718050  | -0.126616 | -1.568024 |
| H | 2.604443  | -1.737131 | -0.855513 |
| H | 3.414573  | -0.435374 | 0.023077  |
| H | 1.244677  | -2.176102 | 1.166881  |
| H | 0.233927  | -0.952879 | 1.922386  |
| H | 1.991123  | -0.832724 | 2.035858  |
| C | -1.442007 | 0.893876  | 0.761892  |
| H | -2.120290 | 1.588844  | 0.258685  |
| H | -1.965093 | 0.547873  | 1.654544  |
| O | -2.412943 | -0.422560 | -0.978580 |
| O | -1.587013 | -1.583375 | 0.408582  |

Rotational constants (GHz): 1.6805400 1.0505300 0.9666100

Vibrational harmonic frequencies (cm-1):

|           |           |           |
|-----------|-----------|-----------|
| -849.4995 | 84.8383   | 157.8268  |
| 190.0815  | 202.9934  | 229.9387  |
| 285.3844  | 287.7358  | 364.0907  |
| 382.0416  | 383.8520  | 411.7143  |
| 455.0299  | 481.5177  | 502.3166  |
| 579.8240  | 643.7983  | 692.4254  |
| 773.2974  | 820.5368  | 853.0105  |
| 882.0019  | 906.0384  | 934.1985  |
| 955.7570  | 956.5938  | 962.9284  |
| 1007.4387 | 1020.2090 | 1025.8011 |
| 1059.7796 | 1076.9627 | 1103.6659 |
| 1135.5523 | 1180.7683 | 1185.2066 |
| 1213.3668 | 1221.2623 | 1233.9850 |
| 1249.6600 | 1262.9619 | 1285.4858 |
| 1305.5551 | 1325.7254 | 1342.2324 |
| 1364.5358 | 1404.6299 | 1428.2975 |
| 1472.2886 | 1483.9968 | 1489.6237 |
| 1503.3586 | 1506.9349 | 1514.2864 |
| 1519.0359 | 3020.3172 | 3025.5463 |
| 3033.3846 | 3042.1938 | 3053.9068 |
| 3062.4525 | 3068.6925 | 3076.0578 |
| 3080.5459 | 3082.2359 | 3097.6700 |
| 3101.8675 | 3103.2339 | 3123.5790 |

Zero-point correction (Hartree): 0.212494

### TS13

CASSCF(4,4)/3-21G(d)

Final geometry

-----

|   |               |               |               |
|---|---------------|---------------|---------------|
| C | -0.9344986284 | 1.2856925103  | -0.8213474461 |
| C | 1.5630182230  | 1.6592082266  | 0.6862780734  |
| C | 1.2115583526  | -0.4914970373 | 3.5152146830  |
| C | -0.2203488260 | -3.4573947321 | -0.2171270944 |
| C | 0.3081681368  | -1.1727895624 | -1.9206081840 |
| C | 2.9492088267  | -0.0098723421 | -1.2575669873 |

|   |               |               |               |
|---|---------------|---------------|---------------|
| C | -0.9881046957 | 3.4075682126  | -2.8420555445 |
| C | -3.5302801053 | 1.1730769503  | 0.4212845318  |
| H | 2.1795960209  | 3.4435399496  | 1.4063338895  |
| H | 0.5599657301  | -5.1439409392 | -1.0824165011 |
| H | -2.2397979924 | -3.7424532716 | -0.0706060365 |
| H | -0.0841790852 | -1.5744563177 | -3.8832480816 |
| H | 4.3931953506  | -1.2329926862 | -0.5256377977 |
| H | 3.7171618961  | 1.1275352521  | -2.7687204142 |
| H | 0.7778469621  | 3.6097121208  | -3.8497318272 |
| H | -1.4444075086 | 5.2000548200  | -1.9606913953 |
| H | -2.4527815909 | 2.9695732069  | -4.2068970978 |
| H | -3.9616661840 | 2.9774441741  | 1.2882423841  |
| H | -3.6479079709 | -0.2340606718 | 1.8774906257  |
| H | -4.9346607513 | 0.7914464532  | -1.0241781386 |
| C | 0.9727635891  | -3.1925959475 | 2.4633091385  |
| H | 2.8546954599  | -3.9733388800 | 2.4385645344  |
| H | -0.1401157612 | -4.2722777585 | 3.7965244597  |
| O | 3.6914592954  | 0.3133350578  | 3.8236196694  |
| O | -0.5999233499 | 0.5397032568  | 4.7095562091  |

Total Molecular Energy

| electronic    | vibrational | total         | energy   |
|---------------|-------------|---------------|----------|
| -495.822992   | 0.229195    | -495.593797   | Hartrees |
| -108820568.37 | 50302.54    | -108770265.83 | cm-1     |
| -1301783.08   | 601.75      | -1301181.33   | kJ/mol   |
| -311133.62    | 143.82      | -310989.80    | kcal/mol |

Rotational constants

| A         | B         | C             |
|-----------|-----------|---------------|
| 1618.0723 | 1075.8548 | 1031.9928 MHz |
| 0.053973  | 0.035887  | 0.034424 cm-1 |

Vibrational Frequencies and IR Intensities

| mode | irrep | frequency | IR intensity |        |              |
|------|-------|-----------|--------------|--------|--------------|
|      |       | cm-1      | hartrees     | km/mol | (D/A)**2/amu |
| 1    | A     | 3416.15   | 0.015565     | 8.032  | 0.1901       |
| 2    | A     | 3374.96   | 0.015377     | 3.617  | 0.0856       |
| 3    | A     | 3367.62   | 0.015344     | 2.796  | 0.0662       |
| 4    | A     | 3312.41   | 0.015092     | 9.011  | 0.2133       |
| 5    | A     | 3295.47   | 0.015015     | 31.499 | 0.7455       |
| 6    | A     | 3275.91   | 0.014926     | 21.255 | 0.5030       |
| 7    | A     | 3267.38   | 0.014887     | 35.327 | 0.8361       |
| 8    | A     | 3264.35   | 0.014873     | 10.839 | 0.2565       |
| 9    | A     | 3261.70   | 0.014861     | 12.033 | 0.2848       |
| 10   | A     | 3255.47   | 0.014833     | 0.959  | 0.0227       |
| 11   | A     | 3252.06   | 0.014817     | 19.493 | 0.4613       |
| 12   | A     | 3217.20   | 0.014659     | 26.831 | 0.6350       |
| 13   | A     | 3208.25   | 0.014618     | 40.452 | 0.9574       |
| 14   | A     | 3200.84   | 0.014584     | 9.586  | 0.2269       |
| 15   | A     | 1686.81   | 0.007686     | 10.186 | 0.2411       |
| 16   | A     | 1678.91   | 0.007650     | 12.890 | 0.3051       |
| 17   | A     | 1669.60   | 0.007607     | 10.552 | 0.2497       |
| 18   | A     | 1666.40   | 0.007593     | 9.082  | 0.2149       |
| 19   | A     | 1655.22   | 0.007542     | 8.270  | 0.1957       |
| 20   | A     | 1649.87   | 0.007517     | 6.582  | 0.1558       |
| 21   | A     | 1640.02   | 0.007472     | 5.452  | 0.1290       |
| 22   | A     | 1595.05   | 0.007268     | 14.345 | 0.3395       |
| 23   | A     | 1569.32   | 0.007150     | 6.684  | 0.1582       |

|    |   |          |           |        |        |
|----|---|----------|-----------|--------|--------|
| 24 | A | 1520.77  | 0.006929  | 0.379  | 0.0090 |
| 25 | A | 1502.26  | 0.006845  | 1.434  | 0.0339 |
| 26 | A | 1460.02  | 0.006652  | 1.225  | 0.0290 |
| 27 | A | 1440.38  | 0.006563  | 3.638  | 0.0861 |
| 28 | A | 1399.75  | 0.006378  | 1.246  | 0.0295 |
| 29 | A | 1380.39  | 0.006290  | 3.807  | 0.0901 |
| 30 | A | 1368.73  | 0.006236  | 2.685  | 0.0635 |
| 31 | A | 1341.90  | 0.006114  | 2.488  | 0.0589 |
| 32 | A | 1329.25  | 0.006057  | 15.553 | 0.3681 |
| 33 | A | 1324.39  | 0.006034  | 5.262  | 0.1245 |
| 34 | A | 1281.24  | 0.005838  | 16.758 | 0.3966 |
| 35 | A | 1258.25  | 0.005733  | 0.418  | 0.0099 |
| 36 | A | 1239.96  | 0.005650  | 66.580 | 1.5757 |
| 37 | A | 1194.32  | 0.005442  | 17.695 | 0.4188 |
| 38 | A | 1160.60  | 0.005288  | 4.890  | 0.1157 |
| 39 | A | 1133.59  | 0.005165  | 5.115  | 0.1210 |
| 40 | A | 1124.25  | 0.005122  | 8.697  | 0.2058 |
| 41 | A | 1118.91  | 0.005098  | 6.955  | 0.1646 |
| 42 | A | 1101.07  | 0.005017  | 0.433  | 0.0102 |
| 43 | A | 1066.25  | 0.004858  | 1.989  | 0.0471 |
| 44 | A | 1019.84  | 0.004647  | 6.602  | 0.1562 |
| 45 | A | 1002.63  | 0.004568  | 14.801 | 0.3503 |
| 46 | A | 960.55   | 0.004377  | 3.934  | 0.0931 |
| 47 | A | 935.64   | 0.004263  | 0.565  | 0.0134 |
| 48 | A | 905.05   | 0.004124  | 4.712  | 0.1115 |
| 49 | A | 863.28   | 0.003933  | 2.884  | 0.0682 |
| 50 | A | 854.48   | 0.003893  | 6.924  | 0.1639 |
| 51 | A | 790.32   | 0.003601  | 19.390 | 0.4589 |
| 52 | A | 716.52   | 0.003265  | 3.097  | 0.0733 |
| 53 | A | 667.10   | 0.003040  | 6.934  | 0.1641 |
| 54 | A | 577.55   | 0.002631  | 13.828 | 0.3273 |
| 55 | A | 575.43   | 0.002622  | 37.327 | 0.8834 |
| 56 | A | 482.48   | 0.002198  | 6.009  | 0.1422 |
| 57 | A | 472.49   | 0.002153  | 26.513 | 0.6275 |
| 58 | A | 451.83   | 0.002059  | 3.392  | 0.0803 |
| 59 | A | 418.62   | 0.001907  | 0.879  | 0.0208 |
| 60 | A | 393.48   | 0.001793  | 2.463  | 0.0583 |
| 61 | A | 363.45   | 0.001656  | 35.049 | 0.8295 |
| 62 | A | 339.04   | 0.001545  | 2.012  | 0.0476 |
| 63 | A | 285.51   | 0.001301  | 2.464  | 0.0583 |
| 64 | A | 265.65   | 0.001210  | 1.831  | 0.0433 |
| 65 | A | 241.97   | 0.001102  | 0.132  | 0.0031 |
| 66 | A | 216.76   | 0.000988  | 3.147  | 0.0745 |
| 67 | A | 173.86   | 0.000792  | 1.281  | 0.0303 |
| 68 | A | 104.31   | 0.000475  | 0.901  | 0.0213 |
| 69 | A | 1162.24i | 0.005296i |        |        |

Printout of CI-coefficients larger than 0.05000 for root 1

(this is the reference state)

Printout of coefficients in interval 0.3162 to 1.000

```

=====
Coefficient of CSF no.      1 is 0.92512972
Occupation and spin coupling
    1  2
    2  2
Coefficient of CSF no.      2 is -0.35584473
Occupation and spin coupling
    1  3
    2  2
    
```

#### TS14

**CASSCF(4,4)/3-21G(d)**

Final geometry



```

-----
C      0.3609307428      -0.8617323334      -1.4741935670
C      0.1172554488      -2.1087273345      1.2213850580
C      1.3722019452      -0.5401109263      3.2938874520
C     -1.5348820145      3.0717713763      0.8077395185
C     -2.0830417781      0.6676261263      -0.7349618840
C     -2.7487958998      -1.5066468304      1.1429799487
C     -0.2923042757      -2.8192329638      -3.5273809253
C      2.8145930977      0.5241987764      -2.2426051992
H      0.7143936607      -4.0552132931      1.3779424253
H     -3.1998341959      3.5321350764      1.9018402658
H     -1.1555111239      4.6487676595      -0.4565008481
H     -3.4012626121      1.0769577592      -2.2402318794
H     -3.5854107343      -0.9637869297      2.9115121896
H     -3.8405659515      -2.9887728849      0.2708216138
H     -2.0155990901      -3.8417131271      -3.1285838540
H      1.2340893583      -4.1777973078      -3.6975333162
H     -0.5122396597      -1.8745333847      -5.3348793990
H      4.1891622135      0.4471849465      -0.7381883021
H      2.4431424484      2.4813176078      -2.7288384763
H      3.6491113888      -0.3577902313      -3.8915302145
C      0.7539680074      2.9169808368      2.5446789035
H      0.6032901115      3.9077909007      4.3011209015
H      2.5126569775      3.2479640312      1.6215409379
O     -0.1734849049      0.0755890217      5.3311501080
O      3.7781285305      -0.5022100265      3.4688304320
    
```

Total Molecular Energy

```

-----
electronic      vibrational      total      energy
-495.820140      0.229668      -495.590472      Hartrees
-108819942.37      50406.32      -108769536.05      cm-1
-1301775.59      602.99      -1301172.60      kJ/mol
-311131.83      144.12      -310987.71      kcal/mol
    
```

Rotational constants

```

-----
A      B      C
1667.1993      1075.1901      996.9985 MHz
0.055612      0.035864      0.033256 cm-1
    
```

Vibrational Frequencies and IR Intensities

```

-----
mode  irrep      frequency      IR intensity
-----
cm-1      hartrees      km/mol      (D/A)**2/amu
-----
1      A      3482.68      0.015868      2.298      0.0544
2      A      3383.28      0.015415      5.333      0.1262
3      A      3364.43      0.015329      5.700      0.1349
4      A      3313.97      0.015100      2.009      0.0476
5      A      3303.91      0.015054      45.773      1.0833
6      A      3279.23      0.014941      10.313      0.2441
7      A      3266.97      0.014885      12.251      0.2899
8      A      3264.41      0.014874      30.481      0.7214
9      A      3261.26      0.014859      18.808      0.4451
10     A      3249.87      0.014807      32.256      0.7634
11     A      3245.62      0.014788      13.845      0.3277
12     A      3204.27      0.014600      31.445      0.7442
    
```

|    |   |          |           |        |        |
|----|---|----------|-----------|--------|--------|
| 13 | A | 3194.56  | 0.014555  | 21.124 | 0.4999 |
| 14 | A | 3183.65  | 0.014506  | 7.948  | 0.1881 |
| 15 | A | 1709.65  | 0.007790  | 13.443 | 0.3182 |
| 16 | A | 1681.26  | 0.007660  | 4.021  | 0.0952 |
| 17 | A | 1678.51  | 0.007648  | 15.094 | 0.3572 |
| 18 | A | 1674.63  | 0.007630  | 6.916  | 0.1637 |
| 19 | A | 1658.17  | 0.007555  | 2.265  | 0.0536 |
| 20 | A | 1648.29  | 0.007510  | 14.646 | 0.3466 |
| 21 | A | 1636.39  | 0.007456  | 0.429  | 0.0102 |
| 22 | A | 1588.28  | 0.007237  | 14.536 | 0.3440 |
| 23 | A | 1572.36  | 0.007164  | 8.714  | 0.2062 |
| 24 | A | 1521.62  | 0.006933  | 1.808  | 0.0428 |
| 25 | A | 1456.14  | 0.006635  | 3.216  | 0.0761 |
| 26 | A | 1439.35  | 0.006558  | 4.498  | 0.1064 |
| 27 | A | 1430.57  | 0.006518  | 5.457  | 0.1291 |
| 28 | A | 1407.34  | 0.006412  | 7.257  | 0.1717 |
| 29 | A | 1400.01  | 0.006379  | 1.643  | 0.0389 |
| 30 | A | 1373.74  | 0.006259  | 23.717 | 0.5613 |
| 31 | A | 1341.99  | 0.006115  | 0.980  | 0.0232 |
| 32 | A | 1338.22  | 0.006097  | 6.652  | 0.1574 |
| 33 | A | 1304.84  | 0.005945  | 15.777 | 0.3734 |
| 34 | A | 1297.37  | 0.005911  | 7.374  | 0.1745 |
| 35 | A | 1262.18  | 0.005751  | 3.406  | 0.0806 |
| 36 | A | 1234.44  | 0.005625  | 19.940 | 0.4719 |
| 37 | A | 1206.71  | 0.005498  | 3.671  | 0.0869 |
| 38 | A | 1178.49  | 0.005370  | 3.015  | 0.0714 |
| 39 | A | 1136.80  | 0.005180  | 6.048  | 0.1431 |
| 40 | A | 1133.52  | 0.005165  | 5.974  | 0.1414 |
| 41 | A | 1114.72  | 0.005079  | 25.302 | 0.5988 |
| 42 | A | 1082.32  | 0.004931  | 1.406  | 0.0333 |
| 43 | A | 1045.79  | 0.004765  | 1.937  | 0.0458 |
| 44 | A | 1044.88  | 0.004761  | 14.750 | 0.3491 |
| 45 | A | 1023.38  | 0.004663  | 5.004  | 0.1184 |
| 46 | A | 994.39   | 0.004531  | 1.930  | 0.0457 |
| 47 | A | 947.69   | 0.004318  | 6.860  | 0.1624 |
| 48 | A | 920.45   | 0.004194  | 0.476  | 0.0113 |
| 49 | A | 861.80   | 0.003927  | 6.131  | 0.1451 |
| 50 | A | 848.28   | 0.003865  | 2.054  | 0.0486 |
| 51 | A | 783.59   | 0.003570  | 23.089 | 0.5464 |
| 52 | A | 681.91   | 0.003107  | 0.523  | 0.0124 |
| 53 | A | 667.39   | 0.003041  | 2.634  | 0.0623 |
| 54 | A | 627.15   | 0.002857  | 26.353 | 0.6237 |
| 55 | A | 550.88   | 0.002510  | 0.340  | 0.0081 |
| 56 | A | 513.02   | 0.002337  | 42.844 | 1.0139 |
| 57 | A | 489.69   | 0.002231  | 7.334  | 0.1736 |
| 58 | A | 443.79   | 0.002022  | 2.821  | 0.0668 |
| 59 | A | 420.68   | 0.001917  | 2.690  | 0.0637 |
| 60 | A | 393.95   | 0.001795  | 24.730 | 0.5853 |
| 61 | A | 379.75   | 0.001730  | 3.740  | 0.0885 |
| 62 | A | 320.45   | 0.001460  | 2.653  | 0.0628 |
| 63 | A | 295.46   | 0.001346  | 0.279  | 0.0066 |
| 64 | A | 270.72   | 0.001233  | 0.223  | 0.0053 |
| 65 | A | 242.32   | 0.001104  | 0.868  | 0.0205 |
| 66 | A | 226.30   | 0.001031  | 1.334  | 0.0316 |
| 67 | A | 160.46   | 0.000731  | 1.993  | 0.0472 |
| 68 | A | 152.47   | 0.000695  | 2.962  | 0.0701 |
| 69 | A | 1341.45i | 0.006112i |        |        |

Printout of CI-coefficients larger than 0.05000 for root 1

(this is the reference state)

Printout of coefficients in interval 0.3162 to 1.000

=====

Coefficient of CSF no. 1 is 0.92029299

Occupation and spin coupling

|   |   |
|---|---|
| 1 | 2 |
| 2 | 2 |

Coefficient of CSF no. 2 is -0.36831083  
 Occupation and spin coupling  
     1    3  
     2    2

=====

**DIO**

**CASSCF(4,4)/3-21G(d)**

Final geometry

-----

|   |               |               |               |
|---|---------------|---------------|---------------|
| C | 0.6352544511  | -1.2006679770 | -1.1738910861 |
| C | -0.6708438629 | -1.6048589803 | 1.4594987603  |
| C | 0.2208915754  | 0.4398513132  | 3.1972293478  |
| C | -0.8192975365 | 3.3608779515  | -0.5318976161 |
| C | -1.5063685545 | 0.7878372017  | -1.6932142700 |
| C | -3.1973821150 | -0.6942158487 | 0.2285022402  |
| C | 0.3492642810  | -3.5436810080 | -2.8629602707 |
| C | 3.4000569842  | -0.3465597579 | -1.2263780454 |
| H | -0.5527044897 | -3.4339982668 | 2.3463947937  |
| H | -2.3564672180 | 4.6773011881  | -0.8480964561 |
| H | 0.8336094895  | 4.1222812887  | -1.4654189536 |
| H | -2.1561078608 | 0.9672468847  | -3.6206548351 |
| H | -4.4667841457 | 0.3996791838  | 1.3954810104  |
| H | -4.2231386674 | -2.2276896217 | -0.6347863873 |
| H | -1.5712329652 | -4.2436107658 | -2.9130087820 |
| H | 1.5615748048  | -5.0510788303 | -2.1830316992 |
| H | 0.9102261354  | -3.0861704745 | -4.7820938545 |
| H | 4.6085202612  | -1.8772855417 | -0.5961166448 |
| H | 3.7708615481  | 1.2635069728  | -0.0272190608 |
| H | 3.9339270519  | 0.1468000905  | -3.1444000083 |
| C | -0.3496541870 | 3.1271224732  | 2.3677987935  |
| H | -2.0293890927 | 3.7076174865  | 3.3802357034  |
| H | 1.1788952851  | 4.3302812717  | 2.9915822608  |
| O | -0.1132478410 | -0.0218025089 | 5.9532020267  |
| O | 2.6095366687  | 0.0012162752  | 4.3832430334  |

Total Molecular Energy

-----

| electronic    | vibrational | total         | energy   |
|---------------|-------------|---------------|----------|
| -495.879923   | 0.231342    | -495.648580   | Hartrees |
| -108833063.24 | 50773.77    | -108782289.46 | cm-1     |
| -1301932.55   | 607.39      | -1301325.16   | kJ/mol   |
| -311169.35    | 145.17      | -311024.18    | kcal/mol |

Rotational constants

-----

| A         | B         | C             |
|-----------|-----------|---------------|
| 1689.0847 | 1046.6813 | 947.2671 MHz  |
| 0.056342  | 0.034914  | 0.031597 cm-1 |

Vibrational Frequencies and IR Intensities

-----

| mode | irrep | frequency | IR intensity |        |              |
|------|-------|-----------|--------------|--------|--------------|
|      |       | cm-1      | hartrees     | km/mol | (D/A)**2/amu |
| 1    | A     | 3325.88   | 0.015154     | 25.250 | 0.5976       |
| 2    | A     | 3307.81   | 0.015072     | 8.231  | 0.1948       |
| 3    | A     | 3295.44   | 0.015015     | 20.546 | 0.4862       |
| 4    | A     | 3292.46   | 0.015002     | 17.085 | 0.4043       |
| 5    | A     | 3275.94   | 0.014926     | 38.440 | 0.9097       |

|    |   |         |          |        |        |
|----|---|---------|----------|--------|--------|
| 6  | A | 3268.78 | 0.014894 | 33.894 | 0.8021 |
| 7  | A | 3260.45 | 0.014856 | 29.678 | 0.7024 |
| 8  | A | 3258.04 | 0.014845 | 12.113 | 0.2867 |
| 9  | A | 3254.34 | 0.014828 | 29.777 | 0.7047 |
| 10 | A | 3246.27 | 0.014791 | 7.372  | 0.1745 |
| 11 | A | 3244.79 | 0.014784 | 3.214  | 0.0761 |
| 12 | A | 3222.31 | 0.014682 | 25.485 | 0.6031 |
| 13 | A | 3202.37 | 0.014591 | 32.465 | 0.7683 |
| 14 | A | 3194.61 | 0.014556 | 16.179 | 0.3829 |
| 15 | A | 1689.01 | 0.007696 | 7.124  | 0.1686 |
| 16 | A | 1682.75 | 0.007667 | 10.575 | 0.2503 |
| 17 | A | 1670.19 | 0.007610 | 7.631  | 0.1806 |
| 18 | A | 1667.74 | 0.007599 | 9.832  | 0.2327 |
| 19 | A | 1660.09 | 0.007564 | 3.991  | 0.0945 |
| 20 | A | 1653.32 | 0.007533 | 2.380  | 0.0563 |
| 21 | A | 1638.27 | 0.007465 | 7.940  | 0.1879 |
| 22 | A | 1589.67 | 0.007243 | 9.117  | 0.2158 |
| 23 | A | 1569.81 | 0.007153 | 9.544  | 0.2259 |
| 24 | A | 1522.20 | 0.006936 | 11.468 | 0.2714 |
| 25 | A | 1500.56 | 0.006837 | 8.693  | 0.2057 |
| 26 | A | 1470.82 | 0.006702 | 5.997  | 0.1419 |
| 27 | A | 1451.90 | 0.006615 | 1.535  | 0.0363 |
| 28 | A | 1416.53 | 0.006454 | 1.855  | 0.0439 |
| 29 | A | 1402.03 | 0.006388 | 1.915  | 0.0453 |
| 30 | A | 1383.79 | 0.006305 | 4.527  | 0.1071 |
| 31 | A | 1379.11 | 0.006284 | 9.162  | 0.2168 |
| 32 | A | 1347.34 | 0.006139 | 7.389  | 0.1749 |
| 33 | A | 1341.49 | 0.006112 | 4.388  | 0.1038 |
| 34 | A | 1334.52 | 0.006081 | 4.904  | 0.1161 |
| 35 | A | 1293.51 | 0.005894 | 3.666  | 0.0868 |
| 36 | A | 1267.18 | 0.005774 | 20.281 | 0.4800 |
| 37 | A | 1245.38 | 0.005674 | 4.686  | 0.1109 |
| 38 | A | 1199.71 | 0.005466 | 2.566  | 0.0607 |
| 39 | A | 1151.83 | 0.005248 | 6.362  | 0.1506 |
| 40 | A | 1145.53 | 0.005219 | 0.607  | 0.0144 |
| 41 | A | 1116.77 | 0.005088 | 1.884  | 0.0446 |
| 42 | A | 1103.98 | 0.005030 | 0.538  | 0.0127 |
| 43 | A | 1054.91 | 0.004807 | 0.709  | 0.0168 |
| 44 | A | 1036.92 | 0.004725 | 2.976  | 0.0704 |
| 45 | A | 1015.95 | 0.004629 | 4.355  | 0.1031 |
| 46 | A | 986.04  | 0.004493 | 0.843  | 0.0200 |
| 47 | A | 956.10  | 0.004356 | 4.666  | 0.1104 |
| 48 | A | 943.29  | 0.004298 | 2.816  | 0.0666 |
| 49 | A | 881.66  | 0.004017 | 2.357  | 0.0558 |
| 50 | A | 870.62  | 0.003967 | 1.657  | 0.0392 |
| 51 | A | 825.90  | 0.003763 | 1.392  | 0.0330 |
| 52 | A | 779.75  | 0.003553 | 0.860  | 0.0204 |
| 53 | A | 696.63  | 0.003174 | 0.310  | 0.0073 |
| 54 | A | 662.46  | 0.003018 | 1.242  | 0.0294 |
| 55 | A | 601.61  | 0.002741 | 3.822  | 0.0905 |
| 56 | A | 535.95  | 0.002442 | 0.469  | 0.0111 |
| 57 | A | 489.62  | 0.002231 | 4.351  | 0.1030 |
| 58 | A | 456.72  | 0.002081 | 0.455  | 0.0108 |
| 59 | A | 428.78  | 0.001954 | 3.076  | 0.0728 |
| 60 | A | 407.28  | 0.001856 | 4.168  | 0.0986 |
| 61 | A | 401.92  | 0.001831 | 0.745  | 0.0176 |
| 62 | A | 376.67  | 0.001716 | 3.233  | 0.0765 |
| 63 | A | 322.61  | 0.001470 | 2.112  | 0.0500 |
| 64 | A | 307.49  | 0.001401 | 0.855  | 0.0202 |
| 65 | A | 250.65  | 0.001142 | 0.078  | 0.0018 |
| 66 | A | 232.30  | 0.001058 | 1.077  | 0.0255 |
| 67 | A | 209.36  | 0.000954 | 0.408  | 0.0097 |
| 68 | A | 166.16  | 0.000757 | 0.603  | 0.0143 |
| 69 | A | 105.63  | 0.000481 | 3.006  | 0.0711 |

Printout of CI-coefficients larger than 0.05000 for root 1

(this is the reference state)

```

Printout of coefficients in interval 0.3162 to 1.000
=====
Coefficient of CSF no.      1 is -0.94614911
Occupation and spin coupling
    1  2
    2  2
Printout of coefficients in interval 0.1000 to 0.3162
=====
Coefficient of CSF no.      2 is 0.28576636
Occupation and spin coupling
    1  3
    2  2
Coefficient of CSF no.      5 is 0.11703516
Occupation and spin coupling
    2  4
    2  2
    
```

=====  
**SB (Singlet Biradical)**

**CASSCF(4,4)/3-21G(d)**

Final geometry

```

-----
C      0.4338568455      -1.1027947113      -1.3377360316
C     -0.0007825338      -1.7138365448       1.5268260271
C      1.0988383795       0.3405370372       3.2271045107
C     -1.2038726852       3.2414535779      -0.0800594111
C     -1.9509417339       0.6398129041      -1.1066128520
C     -2.8445907947      -1.0384524171       1.1540035196
C     -0.1314808283      -3.4492199752      -2.9581757164
C      2.9308404585       0.0481032587      -2.2363330405
H      0.5096747741      -3.5713369339       2.1991794843
H     -2.8984880439       4.3528668910       0.2202550892
H     -0.0667993682       4.2314571913      -1.4623808461
H     -3.1577609204       0.7884497351      -2.7475181091
H     -3.7505876778      -0.1014350975       2.7211400748
H     -3.9581172743      -2.6411655706       0.5701889292
H     -1.8892091643      -4.3567893705      -2.4414290046
H      1.3798959556      -4.8206514170      -2.7562037411
H     -0.2483822084      -2.9130164493      -4.9341557994
H      4.4371576549      -1.3297361037      -2.0595160742
H      3.4884315438       1.6925770215      -1.1762382816
H      2.7593152020       0.5641642326      -4.2146390002
C      0.2579698003       3.0599947705       2.4819201232
H     -0.9402945885       3.7357445325       3.9896954347
H      1.9170507899       4.2512549802       2.4401060552
O      0.0616805691      -0.1003835928       5.7712451292
O      3.7665958486       0.1924020512       3.2093335307
    
```

Total Molecular Energy

```

-----
          electronic      vibrational      total      energy
          -495.861652      0.230654      -495.630998      Hartrees
          -108829053.26      50622.76      -108778430.50      cm-1
          -1301884.58      605.58      -1301279.00      kJ/mol
          -311157.88      144.74      -311013.15      kcal/mol
    
```

Rotational constants

```

-----
          A          B          C
          1651.1744      1052.0441      996.7914 MHz
          0.055077      0.035092      0.033249 cm-1
    
```

Vibrational Frequencies and IR Intensities

| mode | irrep | frequency |          | IR intensity |              |
|------|-------|-----------|----------|--------------|--------------|
|      |       | cm-1      | hartrees | km/mol       | (D/A)**2/amu |
| 1    | A     | 3336.88   | 0.015204 | 20.461       | 0.4842       |
| 2    | A     | 3332.58   | 0.015184 | 16.271       | 0.3851       |
| 3    | A     | 3298.02   | 0.015027 | 16.819       | 0.3980       |
| 4    | A     | 3287.60   | 0.014979 | 28.489       | 0.6742       |
| 5    | A     | 3277.03   | 0.014931 | 21.258       | 0.5031       |
| 6    | A     | 3270.41   | 0.014901 | 18.164       | 0.4299       |
| 7    | A     | 3262.10   | 0.014863 | 37.878       | 0.8964       |
| 8    | A     | 3256.66   | 0.014838 | 10.367       | 0.2453       |
| 9    | A     | 3254.06   | 0.014827 | 20.350       | 0.4816       |
| 10   | A     | 3253.14   | 0.014822 | 28.576       | 0.6763       |
| 11   | A     | 3243.95   | 0.014781 | 1.864        | 0.0441       |
| 12   | A     | 3219.79   | 0.014670 | 24.415       | 0.5778       |
| 13   | A     | 3202.37   | 0.014591 | 42.051       | 0.9952       |
| 14   | A     | 3194.32   | 0.014554 | 13.968       | 0.3306       |
| 15   | A     | 1686.76   | 0.007685 | 8.053        | 0.1906       |
| 16   | A     | 1683.00   | 0.007668 | 9.271        | 0.2194       |
| 17   | A     | 1670.88   | 0.007613 | 10.697       | 0.2532       |
| 18   | A     | 1668.61   | 0.007603 | 8.813        | 0.2086       |
| 19   | A     | 1659.96   | 0.007563 | 2.763        | 0.0654       |
| 20   | A     | 1652.89   | 0.007531 | 1.419        | 0.0336       |
| 21   | A     | 1640.73   | 0.007476 | 8.718        | 0.2063       |
| 22   | A     | 1591.59   | 0.007252 | 8.331        | 0.1972       |
| 23   | A     | 1570.62   | 0.007156 | 8.853        | 0.2095       |
| 24   | A     | 1523.55   | 0.006942 | 2.532        | 0.0599       |
| 25   | A     | 1503.63   | 0.006851 | 2.835        | 0.0671       |
| 26   | A     | 1466.87   | 0.006684 | 0.748        | 0.0177       |
| 27   | A     | 1454.95   | 0.006629 | 3.121        | 0.0739       |
| 28   | A     | 1425.33   | 0.006494 | 0.381        | 0.0090       |
| 29   | A     | 1411.65   | 0.006432 | 0.316        | 0.0075       |
| 30   | A     | 1394.66   | 0.006355 | 14.114       | 0.3340       |
| 31   | A     | 1375.37   | 0.006267 | 3.924        | 0.0929       |
| 32   | A     | 1343.86   | 0.006123 | 0.980        | 0.0232       |
| 33   | A     | 1341.56   | 0.006113 | 0.089        | 0.0021       |
| 34   | A     | 1295.89   | 0.005905 | 4.130        | 0.0977       |
| 35   | A     | 1270.29   | 0.005788 | 6.243        | 0.1478       |
| 36   | A     | 1253.45   | 0.005711 | 1.243        | 0.0294       |
| 37   | A     | 1217.61   | 0.005548 | 6.275        | 0.1485       |
| 38   | A     | 1174.31   | 0.005351 | 3.039        | 0.0719       |
| 39   | A     | 1146.71   | 0.005225 | 1.452        | 0.0344       |
| 40   | A     | 1111.13   | 0.005063 | 3.962        | 0.0938       |
| 41   | A     | 1103.01   | 0.005026 | 2.721        | 0.0644       |
| 42   | A     | 1073.14   | 0.004890 | 8.169        | 0.1933       |
| 43   | A     | 1055.00   | 0.004807 | 7.252        | 0.1716       |
| 44   | A     | 1027.15   | 0.004680 | 5.042        | 0.1193       |
| 45   | A     | 1014.37   | 0.004622 | 10.655       | 0.2522       |
| 46   | A     | 995.03    | 0.004534 | 1.496        | 0.0354       |
| 47   | A     | 968.64    | 0.004413 | 1.063        | 0.0252       |
| 48   | A     | 923.79    | 0.004209 | 0.899        | 0.0213       |
| 49   | A     | 910.71    | 0.004149 | 6.391        | 0.1513       |
| 50   | A     | 869.96    | 0.003964 | 1.646        | 0.0389       |
| 51   | A     | 830.87    | 0.003786 | 0.931        | 0.0220       |
| 52   | A     | 783.11    | 0.003568 | 0.641        | 0.0152       |
| 53   | A     | 683.57    | 0.003115 | 0.158        | 0.0037       |
| 54   | A     | 638.56    | 0.002910 | 0.780        | 0.0185       |
| 55   | A     | 580.71    | 0.002646 | 6.185        | 0.1464       |
| 56   | A     | 530.08    | 0.002415 | 0.164        | 0.0039       |
| 57   | A     | 481.00    | 0.002192 | 3.757        | 0.0889       |
| 58   | A     | 452.13    | 0.002060 | 1.180        | 0.0279       |
| 59   | A     | 417.18    | 0.001901 | 2.980        | 0.0705       |
| 60   | A     | 403.26    | 0.001837 | 1.646        | 0.0389       |
| 61   | A     | 383.87    | 0.001749 | 6.362        | 0.1506       |

|    |   |        |          |       |        |
|----|---|--------|----------|-------|--------|
| 62 | A | 349.82 | 0.001594 | 7.215 | 0.1707 |
| 63 | A | 315.08 | 0.001436 | 0.465 | 0.0110 |
| 64 | A | 291.16 | 0.001327 | 0.131 | 0.0031 |
| 65 | A | 248.60 | 0.001133 | 0.064 | 0.0015 |
| 66 | A | 234.68 | 0.001069 | 1.062 | 0.0251 |
| 67 | A | 208.95 | 0.000952 | 0.257 | 0.0061 |
| 68 | A | 174.75 | 0.000796 | 0.738 | 0.0175 |
| 69 | A | 72.61  | 0.000331 | 1.002 | 0.0237 |

Printout of CI-coefficients larger than 0.05000 for root 1

(this is the reference state)

Printout of coefficients in interval 0.3162 to 1.000

=====

Coefficient of CSF no. 1 is 0.73573246

Occupation and spin coupling

1 2

2 2

Coefficient of CSF no. 2 is -0.66440043

Occupation and spin coupling

1 3

2 2

### TS15

-----

E(RB+HF-LYP/6-311G(d,p)) (Hartree): -501.81537143

Electronic state : 1-A

Cartesian coordinates (Angs):

|   |           |           |           |
|---|-----------|-----------|-----------|
| C | 1.167084  | -0.384402 | 0.092949  |
| C | -0.073895 | -0.632850 | -0.807109 |
| C | -1.623775 | -0.798519 | -0.140848 |
| C | 0.273311  | 2.019717  | 0.663362  |
| C | 1.086493  | 1.115342  | -0.346362 |
| C | 0.239560  | 0.665827  | -1.562728 |
| C | 2.422217  | -1.029995 | -0.540245 |
| C | 1.135076  | -0.737615 | 1.575345  |
| H | -0.086902 | -1.564006 | -1.377017 |
| H | 0.249185  | 3.013868  | 0.196718  |
| H | 0.820663  | 2.064376  | 1.606499  |
| H | 2.030615  | 1.631334  | -0.534536 |
| H | -0.608243 | 1.273776  | -1.876700 |
| H | 0.873616  | 0.491589  | -2.435562 |
| H | 2.527675  | -0.797367 | -1.601896 |
| H | 2.368136  | -2.116838 | -0.438269 |
| H | 3.326315  | -0.686948 | -0.027923 |
| H | 1.182162  | -1.819971 | 1.709353  |
| H | 0.209831  | -0.415677 | 2.053856  |
| H | 1.990682  | -0.292686 | 2.095997  |
| C | -1.092291 | 1.560646  | 0.850166  |
| H | -1.854654 | 1.745123  | 0.106713  |
| H | -1.429286 | 1.113798  | 1.777220  |
| O | -2.483804 | -0.230063 | -0.817224 |
| O | -1.616505 | -1.558597 | 0.822020  |

Rotational constants (GHz): 1.4680200 1.0435500 0.9197500

Vibrational harmonic frequencies (cm-1):

|           |          |          |
|-----------|----------|----------|
| -243.4746 | 89.8584  | 118.0509 |
| 148.0197  | 195.0389 | 203.4637 |
| 216.1989  | 239.9465 | 271.3366 |
| 314.3477  | 333.6007 | 356.7025 |
| 370.1500  | 416.6542 | 460.3185 |
| 470.4545  | 548.3383 | 567.3440 |
| 651.6072  | 694.7802 | 764.9795 |
| 813.0827  | 842.9052 | 871.2070 |
| 919.3257  | 925.4832 | 957.6918 |

|           |           |           |
|-----------|-----------|-----------|
| 983.2950  | 998.2877  | 1016.6558 |
| 1019.2041 | 1043.7893 | 1068.0075 |
| 1121.3170 | 1133.9098 | 1157.9389 |
| 1169.4109 | 1183.7555 | 1207.4422 |
| 1230.7291 | 1255.1472 | 1270.6172 |
| 1291.4910 | 1306.7112 | 1343.4648 |
| 1400.5295 | 1422.2673 | 1463.1424 |
| 1476.7076 | 1485.2061 | 1490.6157 |
| 1503.0119 | 1507.0224 | 1528.6273 |
| 1747.0871 | 2995.7756 | 3020.1351 |
| 3026.6710 | 3053.2913 | 3069.1479 |
| 3076.1647 | 3088.3413 | 3093.0321 |
| 3097.7237 | 3103.5485 | 3112.7412 |
| 3117.7755 | 3170.8492 | 3279.1554 |

Zero-point correction (Hartree): 0.209342

### TS16

-----  
 E(RB+HF-LYP/6-311G(d,p)) (Hartree): -501.84263511

Electronic state : 1-A

Cartesian coordinates (Angs):

|   |           |           |           |
|---|-----------|-----------|-----------|
| C | 1.355832  | 0.381268  | -0.103556 |
| C | 1.074545  | -0.045234 | 1.291366  |
| C | -1.914305 | 0.338036  | 0.304964  |
| C | -0.559212 | -1.050359 | -1.374494 |
| C | 0.760732  | -1.031510 | -0.564774 |
| C | 0.703536  | -1.388635 | 0.952447  |
| C | 2.912715  | 0.316299  | -0.230310 |
| C | 0.861679  | 1.718450  | -0.645698 |
| H | 1.178054  | 0.466613  | 2.242769  |
| H | -0.598647 | -2.001977 | -1.914737 |
| H | -0.482760 | -0.275078 | -2.144048 |
| H | 1.511186  | -1.594052 | -1.123932 |
| H | -0.397625 | -1.199781 | 1.311578  |
| H | 1.091136  | -2.287051 | 1.429001  |
| H | 3.329509  | -0.619672 | 0.147725  |
| H | 3.378917  | 1.147988  | 0.302719  |
| H | 3.165703  | 0.401077  | -1.290223 |
| H | 1.359376  | 2.537533  | -0.117750 |
| H | -0.211800 | 1.852529  | -0.534785 |
| H | 1.119788  | 1.804072  | -1.705444 |
| C | -1.910995 | -0.884945 | -0.634396 |
| H | -2.127512 | -1.788786 | -0.057650 |
| H | -2.695700 | -0.761872 | -1.382402 |
| O | -2.371656 | 1.407190  | -0.072931 |
| O | -1.294192 | 0.117590  | 1.430916  |

Rotational constants (GHz): 1.7462600 0.9215400 0.8661200

Vibrational harmonic frequencies (cm-1):

|           |           |           |
|-----------|-----------|-----------|
| -982.8960 | 112.2031  | 115.4687  |
| 155.8194  | 185.2730  | 195.8702  |
| 229.4644  | 266.9371  | 283.1459  |
| 296.0900  | 356.4643  | 392.5376  |
| 414.4508  | 447.2626  | 479.9777  |
| 603.2315  | 621.8822  | 648.9457  |
| 746.4864  | 757.4000  | 827.5696  |
| 856.7893  | 867.7858  | 884.7225  |
| 906.5864  | 928.6612  | 961.2867  |
| 977.0581  | 1006.8394 | 1011.8415 |
| 1044.1439 | 1086.0820 | 1116.2619 |
| 1127.4043 | 1168.4790 | 1185.2758 |
| 1198.7874 | 1228.9861 | 1245.6197 |
| 1289.9908 | 1295.2106 | 1328.4292 |
| 1346.1057 | 1363.6526 | 1372.0834 |
| 1391.4290 | 1402.9160 | 1433.8432 |
| 1482.7291 | 1485.5402 | 1490.8437 |
| 1493.8114 | 1503.4972 | 1520.8746 |
| 1706.8271 | 2128.5242 | 3023.9417 |



|           |           |           |
|-----------|-----------|-----------|
| 3028.0525 | 3031.5213 | 3039.8815 |
| 3057.4520 | 3067.3670 | 3084.4258 |
| 3100.8857 | 3103.9982 | 3108.2721 |
| 3126.1136 | 3151.5958 | 3194.0045 |

Zero-point correction (Hartree): 0.209803

**TS17**

-----  
E(RB+HF-LYP/6-311G(d,p)) (Hartree): -501.82396482  
Electronic state : 1-A  
Cartesian coordinates (Angs):

|   |           |           |           |
|---|-----------|-----------|-----------|
| C | -1.597632 | 0.178953  | -0.180675 |
| C | -0.430334 | -0.231623 | -1.016206 |
| C | 2.237956  | 0.148243  | -0.316672 |
| C | 0.202932  | -0.050141 | 1.691918  |
| C | -0.896265 | -0.764035 | 0.900735  |
| C | -0.221151 | -1.510667 | -0.312149 |
| C | -2.903136 | -0.505787 | -0.693731 |
| C | -1.938615 | 1.647740  | 0.085048  |
| H | 0.143655  | 0.279275  | -1.782360 |
| H | 0.826487  | -0.804766 | 2.179518  |
| H | -0.247700 | 0.554833  | 2.489055  |
| H | -1.581022 | -1.350601 | 1.518422  |
| H | 0.806941  | -1.860551 | -0.216523 |
| H | -0.856899 | -2.321352 | -0.679757 |
| H | -2.773516 | -1.558645 | -0.938909 |
| H | -3.274051 | 0.011725  | -1.581353 |
| H | -3.660148 | -0.425377 | 0.090085  |
| H | -2.848431 | 1.707347  | 0.687875  |
| H | -2.135037 | 2.165131  | -0.858652 |
| H | -1.158956 | 2.190762  | 0.610531  |
| C | 1.086571  | 0.824094  | 0.810718  |
| H | 1.924921  | 1.202840  | 1.405167  |
| H | 0.609713  | 1.704475  | 0.395058  |
| O | 2.639295  | -0.949202 | 0.052412  |
| O | 2.483466  | 0.959733  | -1.193921 |

Rotational constants (GHz): 1.9453500 0.7808000 0.7559500  
Vibrational harmonic frequencies (cm-1):

|           |           |           |
|-----------|-----------|-----------|
| -247.8142 | 82.9123   | 101.8515  |
| 122.5398  | 173.7125  | 213.6812  |
| 221.1171  | 243.6867  | 268.6759  |
| 315.0769  | 372.6440  | 379.0952  |
| 408.0607  | 430.5892  | 462.6399  |
| 517.3753  | 595.0608  | 603.8818  |
| 680.3823  | 711.9035  | 766.9822  |
| 807.5515  | 816.9467  | 874.8040  |
| 898.7106  | 933.6998  | 950.6773  |
| 970.1921  | 982.3081  | 1006.8219 |
| 1013.9822 | 1069.9167 | 1073.7448 |
| 1098.9857 | 1145.8789 | 1151.3423 |
| 1167.2212 | 1211.9690 | 1232.3570 |
| 1258.1129 | 1275.8475 | 1287.8558 |
| 1317.2754 | 1344.8200 | 1359.4020 |
| 1397.8130 | 1421.8727 | 1450.8458 |
| 1465.4453 | 1482.1611 | 1487.7866 |
| 1491.7422 | 1508.2737 | 1519.0053 |
| 1846.2700 | 3008.3651 | 3036.2233 |
| 3039.9781 | 3042.5450 | 3043.6047 |
| 3063.7191 | 3069.7059 | 3091.6670 |
| 3097.1385 | 3105.3360 | 3135.8174 |
| 3155.8672 | 3176.6708 | 3188.3242 |

Zero-point correction (Hartree): 0.210157

**TS18**

-----  
E(RB+HF-LYP/6-311G(d,p)) (Hartree): -501.82188139

Electronic state : 1-A

Cartesian coordinates (Angs):

|   |           |           |           |
|---|-----------|-----------|-----------|
| C | 2.016223  | 0.438926  | 0.133003  |
| C | 2.998443  | -0.724315 | 0.255039  |
| C | -3.260010 | 0.157982  | -0.006266 |
| C | -0.304755 | -0.984780 | -0.059942 |
| C | 1.082334  | -0.628729 | -0.613086 |
| C | 2.207531  | -1.614848 | -0.346413 |
| C | 2.491872  | 1.580651  | -0.771489 |
| C | 1.519286  | 0.981862  | 1.476037  |
| H | 3.999804  | -0.773591 | 0.670852  |
| H | -0.245669 | -1.147447 | 1.020416  |
| H | -0.603695 | -1.944099 | -0.498906 |
| H | 0.978712  | -0.380352 | -1.676535 |
| H | -2.228572 | -0.786091 | 0.277185  |
| H | 2.316376  | -2.665259 | -0.593815 |
| H | 2.854010  | 1.200548  | -1.730526 |
| H | 3.310679  | 2.133304  | -0.299489 |
| H | 1.682857  | 2.291208  | -0.969195 |
| H | 0.708440  | 1.705296  | 1.346991  |
| H | 2.335939  | 1.498689  | 1.990100  |
| H | 1.171752  | 0.186237  | 2.138416  |
| C | -1.373279 | 0.100282  | -0.396986 |
| H | -1.455037 | 0.216356  | -1.477220 |
| H | -1.110304 | 1.051933  | 0.059834  |
| O | -3.444440 | -0.925264 | 0.616659  |
| O | -3.803206 | 1.121649  | -0.401345 |

Rotational constants (GHz): 2.1434800 0.4877800 0.4484800

Vibrational harmonic frequencies (cm-1):

|            |           |           |
|------------|-----------|-----------|
| -2045.8885 | 37.6122   | 45.5333   |
| 66.5901    | 125.5550  | 154.7970  |
| 209.7020   | 229.5639  | 247.8647  |
| 268.7603   | 280.2652  | 349.4251  |
| 353.7804   | 378.5263  | 435.7579  |
| 485.8601   | 562.0787  | 595.0287  |
| 625.2010   | 652.0754  | 728.5254  |
| 747.2280   | 772.7047  | 859.8317  |
| 883.9470   | 940.7882  | 947.8188  |
| 952.3685   | 969.3662  | 991.1738  |
| 1010.9542  | 1048.9398 | 1076.5751 |
| 1113.5622  | 1139.4198 | 1172.8220 |
| 1187.0669  | 1205.5683 | 1236.8094 |
| 1251.5844  | 1293.7894 | 1306.1747 |
| 1319.0970  | 1344.1666 | 1374.9992 |
| 1400.7884  | 1419.6944 | 1455.9021 |
| 1482.6690  | 1487.9732 | 1495.8989 |
| 1504.5376  | 1513.6710 | 1639.4194 |
| 1833.8504  | 2096.5982 | 3008.8666 |
| 3016.0192  | 3017.5725 | 3024.0995 |
| 3061.7776  | 3074.5095 | 3078.7169 |
| 3082.3466  | 3087.9942 | 3100.4394 |
| 3151.0745  | 3155.2338 | 3187.8541 |

Zero-point correction (Hartree): 0.205848

**TS19**

-----

E(UB+HF-LYP/6-311G(d,p)) (Hartree): -501.75730869

Electronic state : 1-A

Cartesian coordinates (Angs):

|   |           |           |           |
|---|-----------|-----------|-----------|
| C | 1.504928  | -0.529481 | 0.203543  |
| C | -0.138089 | 0.175542  | -1.348753 |
| C | -1.200160 | 0.111944  | -0.476075 |
| C | 0.164783  | 1.407500  | 1.235883  |
| C | 1.307748  | 0.984759  | 0.292795  |
| C | 0.870085  | 1.292318  | -1.147132 |
| C | 2.670665  | -1.034390 | -0.597059 |
| C | 1.063991  | -1.449309 | 1.300402  |

|                                                           |           |           |           |
|-----------------------------------------------------------|-----------|-----------|-----------|
| H                                                         | -0.186157 | -0.399775 | -2.266438 |
| H                                                         | 0.153743  | 2.499848  | 1.269888  |
| H                                                         | 0.374757  | 1.073304  | 2.254728  |
| H                                                         | 2.228518  | 1.503192  | 0.599649  |
| H                                                         | 0.444517  | 2.295006  | -1.276556 |
| H                                                         | 1.693285  | 1.202022  | -1.854886 |
| H                                                         | 2.904404  | -0.421207 | -1.468184 |
| H                                                         | 2.510321  | -2.062711 | -0.932439 |
| H                                                         | 3.574919  | -1.046631 | 0.034580  |
| H                                                         | 1.034586  | -2.484712 | 0.950968  |
| H                                                         | 0.085446  | -1.204607 | 1.712202  |
| H                                                         | 1.783026  | -1.417478 | 2.136452  |
| C                                                         | -1.238428 | 0.888248  | 0.799264  |
| H                                                         | -1.945912 | 1.717175  | 0.683930  |
| H                                                         | -1.702992 | 0.243052  | 1.548654  |
| O                                                         | -3.193229 | -0.827235 | 0.138638  |
| O                                                         | -2.179972 | -0.745171 | -0.759857 |
| Rotational constants (GHz): 1.7142900 0.8265900 0.7908000 |           |           |           |
| Vibrational harmonic frequencies (cm-1):                  |           |           |           |
| -399.4928                                                 | 75.2825   | 97.8351   |           |
| 131.0913                                                  | 144.3403  | 159.8080  |           |
| 213.7138                                                  | 259.9755  | 279.5811  |           |
| 315.7837                                                  | 367.6621  | 396.6859  |           |
| 406.1037                                                  | 452.6417  | 477.6161  |           |
| 568.7060                                                  | 601.8466  | 683.8842  |           |
| 772.1600                                                  | 805.9634  | 813.9215  |           |
| 842.2408                                                  | 911.1222  | 930.1708  |           |
| 934.9813                                                  | 967.2158  | 976.5635  |           |
| 987.8564                                                  | 1010.5554 | 1037.7751 |           |
| 1047.9663                                                 | 1075.0331 | 1085.5567 |           |
| 1137.4574                                                 | 1166.9351 | 1196.8567 |           |
| 1219.7051                                                 | 1239.3413 | 1261.4120 |           |
| 1286.5158                                                 | 1305.3900 | 1329.4504 |           |
| 1341.1615                                                 | 1368.3209 | 1392.9246 |           |
| 1397.8391                                                 | 1412.8089 | 1464.1456 |           |
| 1470.4107                                                 | 1477.1222 | 1488.3341 |           |
| 1495.9033                                                 | 1508.0451 | 1518.1826 |           |
| 1544.7403                                                 | 2947.8530 | 2952.7808 |           |
| 2970.1065                                                 | 3012.2352 | 3031.5565 |           |
| 3049.9055                                                 | 3057.1781 | 3065.6218 |           |
| 3069.2561                                                 | 3085.3237 | 3105.1886 |           |
| 3116.2295                                                 | 3124.2683 | 3178.7120 |           |
| Zero-point correction (Hartree): 0.211006                 |           |           |           |

## TS20

-----  
 E(UB+HF-LYP/6-311G(d,p)) (Hartree): -501.75633545  
 Electronic state : 1-A  
 Cartesian coordinates (Angs):

|   |           |           |           |
|---|-----------|-----------|-----------|
| C | 1.374352  | -0.557334 | 0.295609  |
| C | -0.474576 | -0.169735 | -1.181421 |
| C | -1.292911 | 0.305630  | -0.197894 |
| C | 0.540032  | 1.846717  | 0.638806  |
| C | 1.381975  | 0.883469  | -0.220169 |
| C | 0.685567  | 0.719263  | -1.586367 |
| C | 2.275679  | -1.544859 | -0.382481 |
| C | 1.002199  | -0.888387 | 1.706024  |
| H | -0.748618 | -1.076388 | -1.702645 |
| H | 0.769739  | 2.869429  | 0.329971  |
| H | 0.832802  | 1.768788  | 1.687852  |
| H | 2.406972  | 1.277175  | -0.293232 |
| H | 0.377555  | 1.672536  | -2.033926 |
| H | 1.324279  | 0.219701  | -2.313987 |
| H | 2.419985  | -1.345357 | -1.445083 |
| H | 1.906198  | -2.567415 | -0.269403 |
| H | 3.274525  | -1.516314 | 0.085178  |
| H | 0.923194  | -1.968734 | 1.844172  |

|                                          |           |           |           |  |
|------------------------------------------|-----------|-----------|-----------|--|
| H                                        | 0.054719  | -0.442390 | 2.016501  |  |
| H                                        | 1.770701  | -0.525675 | 2.408872  |  |
| C                                        | -0.999000 | 1.607378  | 0.490785  |  |
| H                                        | -1.432751 | 2.424079  | -0.096566 |  |
| H                                        | -1.503491 | 1.624314  | 1.458849  |  |
| O                                        | -2.579078 | -1.591676 | -0.193805 |  |
| O                                        | -2.337887 | -0.361651 | 0.312067  |  |
| Rotational constants (GHz):              | 1.4766300 | 0.9631700 | 0.8296900 |  |
| Vibrational harmonic frequencies (cm-1): |           |           |           |  |
| -332.4145                                | 71.1861   |           | 96.8723   |  |
| 128.2908                                 | 150.2760  |           | 154.3095  |  |
| 220.6829                                 | 266.3988  |           | 284.1555  |  |
| 305.6767                                 | 364.0056  |           | 380.5947  |  |
| 413.1823                                 | 443.9181  |           | 503.7315  |  |
| 568.8609                                 | 598.4443  |           | 708.5708  |  |
| 777.3432                                 | 805.9334  |           | 826.6847  |  |
| 837.4031                                 | 915.2356  |           | 921.5591  |  |
| 931.2304                                 | 961.3276  |           | 976.0190  |  |
| 992.7975                                 | 1019.4316 |           | 1027.4501 |  |
| 1037.4430                                | 1066.3431 |           | 1081.2209 |  |
| 1136.8846                                | 1160.1463 |           | 1201.0830 |  |
| 1217.3973                                | 1251.7695 |           | 1268.0681 |  |
| 1287.3499                                | 1298.3651 |           | 1330.4791 |  |
| 1338.6140                                | 1359.0381 |           | 1384.3851 |  |
| 1398.6741                                | 1412.2908 |           | 1467.7964 |  |
| 1478.4476                                | 1482.3968 |           | 1486.9859 |  |
| 1494.2804                                | 1506.5168 |           | 1518.1834 |  |
| 1533.3207                                | 2946.9448 |           | 2953.9893 |  |
| 2968.4472                                | 3009.3514 |           | 3024.0657 |  |
| 3052.9807                                | 3059.3189 |           | 3064.0653 |  |
| 3078.3372                                | 3094.3823 |           | 3099.4741 |  |
| 3105.6153                                | 3114.4901 |           | 3217.3600 |  |
| Zero-point correction (Hartree):         | 0.211045  |           |           |  |

### TS21

-----  
 E(UB+HF-LYP/6-311G(d,p)) (Hartree): -501.77897569  
 Electronic state : 1-A  
 Cartesian coordinates (Angs):

|                                          |           |           |           |  |
|------------------------------------------|-----------|-----------|-----------|--|
| C                                        | 1.484880  | -0.202957 | 0.092441  |  |
| C                                        | 0.169078  | -0.868114 | -0.466083 |  |
| C                                        | -1.009444 | -0.530397 | 0.431338  |  |
| C                                        | -0.099849 | 1.799339  | 0.336941  |  |
| C                                        | 0.937545  | 1.115300  | -0.570691 |  |
| C                                        | 0.181991  | 0.213952  | -1.591466 |  |
| C                                        | 2.736386  | -0.728940 | -0.624255 |  |
| C                                        | 1.750687  | -0.232438 | 1.599863  |  |
| H                                        | 0.172837  | -1.927474 | -0.724364 |  |
| H                                        | -0.604357 | 2.615658  | -0.198121 |  |
| H                                        | 0.369069  | 2.281299  | 1.208356  |  |
| H                                        | 1.670676  | 1.832809  | -0.947564 |  |
| H                                        | -0.797302 | 0.544509  | -1.937387 |  |
| H                                        | 0.798390  | -0.066883 | -2.443847 |  |
| H                                        | 2.638643  | -0.739503 | -1.710638 |  |
| H                                        | 2.957382  | -1.750743 | -0.301067 |  |
| H                                        | 3.603230  | -0.108103 | -0.375513 |  |
| H                                        | 1.984036  | -1.252984 | 1.919381  |  |
| H                                        | 0.906973  | 0.106258  | 2.202888  |  |
| H                                        | 2.613589  | 0.394675  | 1.847444  |  |
| O                                        | -1.967978 | -1.314405 | 0.640808  |  |
| C                                        | -1.122416 | 0.823272  | 0.807471  |  |
| H                                        | -1.981715 | 1.128429  | 1.389712  |  |
| O                                        | -3.102508 | -0.080231 | -0.519414 |  |
| H                                        | -3.940713 | -0.234954 | -0.993783 |  |
| Rotational constants (GHz):              | 1.9306500 | 0.8466700 | 0.8296300 |  |
| Vibrational harmonic frequencies (cm-1): |           |           |           |  |
| -433.1361                                | 93.3067   |           | 115.7493  |  |

|           |           |           |
|-----------|-----------|-----------|
| 183.5778  | 199.7091  | 222.6732  |
| 234.6014  | 293.3938  | 320.3343  |
| 336.0066  | 361.1845  | 388.0308  |
| 423.4079  | 443.6953  | 468.8119  |
| 498.7184  | 597.0008  | 628.5315  |
| 688.8641  | 757.6548  | 790.2895  |
| 835.4882  | 842.8670  | 854.4295  |
| 889.6378  | 916.8371  | 942.3688  |
| 956.9016  | 968.1027  | 973.4601  |
| 1018.4960 | 1061.9299 | 1068.3906 |
| 1089.8994 | 1123.0178 | 1155.6948 |
| 1198.7237 | 1210.4179 | 1231.7651 |
| 1248.6779 | 1256.6376 | 1286.0042 |
| 1298.6832 | 1316.4042 | 1366.6584 |
| 1404.4892 | 1413.4421 | 1423.2599 |
| 1452.6039 | 1486.5907 | 1490.5409 |
| 1502.5018 | 1507.5599 | 1513.7616 |
| 1519.8202 | 2982.3367 | 3008.8729 |
| 3019.4928 | 3025.4748 | 3059.0496 |
| 3073.3410 | 3076.2555 | 3079.9421 |
| 3096.1179 | 3103.3398 | 3108.3290 |
| 3132.3910 | 3220.4483 | 3671.9750 |

Zero-point correction (Hartree): 0.210797

## Stationary points on triplet PES

### Triplet Biradical

-----

E(UB+HF-LYP/6-311G(d,p)) (Hartree): -501.80286294

Electronic state : 3-A

Cartesian coordinates (Angs):

|   |           |           |           |
|---|-----------|-----------|-----------|
| C | 1.232042  | -0.280500 | 0.060626  |
| C | 0.048958  | -0.312648 | -0.965012 |
| C | -1.360635 | -0.411632 | -0.156005 |
| C | -0.168239 | 1.550741  | 1.164864  |
| C | 0.943296  | 1.260010  | 0.148108  |
| C | 0.326142  | 1.171395  | -1.278692 |
| C | 2.553884  | -0.581611 | -0.670420 |
| C | 1.188223  | -1.126691 | 1.332312  |
| H | 0.028543  | -1.072942 | -1.744045 |
| H | -0.343108 | 2.629736  | 1.214513  |
| H | 0.154907  | 1.245123  | 2.163387  |
| H | 1.807515  | 1.912096  | 0.298195  |
| H | -0.529413 | 1.806094  | -1.510813 |
| H | 1.061374  | 1.285483  | -2.074609 |
| H | 2.683244  | 0.001023  | -1.583500 |
| H | 2.609908  | -1.640947 | -0.936902 |
| H | 3.397633  | -0.358105 | -0.010037 |
| H | 1.276779  | -2.187815 | 1.086404  |
| H | 0.268912  | -1.005976 | 1.906102  |
| H | 2.027739  | -0.862355 | 1.984419  |
| C | -1.496209 | 0.855790  | 0.777438  |
| H | -2.133729 | 1.549379  | 0.229246  |
| H | -2.051674 | 0.524802  | 1.655550  |
| O | -2.274624 | -0.454888 | -1.120803 |
| O | -1.458300 | -1.616952 | 0.476151  |

Rotational constants (GHz): 1.6433100 1.0677000 0.9938900

Vibrational harmonic frequencies (cm-1):

|           |           |           |
|-----------|-----------|-----------|
| 102.5072  | 170.0186  | 197.5138  |
| 207.4968  | 224.4215  | 266.4786  |
| 303.6597  | 324.8700  | 366.5363  |
| 376.8880  | 391.3176  | 421.3327  |
| 448.5291  | 462.0957  | 527.3298  |
| 582.0499  | 585.5599  | 658.6582  |
| 707.9981  | 801.3904  | 820.4660  |
| 863.5166  | 877.4204  | 907.6585  |
| 951.6725  | 962.9184  | 965.3275  |
| 972.5865  | 1007.8758 | 1020.8366 |
| 1042.0363 | 1086.8353 | 1097.4896 |
| 1118.3291 | 1139.3150 | 1159.2148 |
| 1209.2175 | 1223.1078 | 1228.6529 |
| 1239.0301 | 1247.3775 | 1258.1345 |
| 1288.2970 | 1318.3073 | 1334.7164 |
| 1368.2723 | 1402.7823 | 1428.5047 |
| 1477.3183 | 1482.0121 | 1486.3181 |
| 1501.5030 | 1505.1139 | 1510.6685 |
| 1519.3742 | 3023.2468 | 3028.5322 |
| 3035.2719 | 3058.8062 | 3066.8603 |
| 3072.3027 | 3078.2775 | 3082.1233 |
| 3088.9793 | 3108.2962 | 3111.3364 |
| 3115.0017 | 3119.7002 | 3124.1735 |

Zero-point correction (Hartree): 0.212466

### Int1-T-B3LYP

-----

E(UB+HF-LYP/6-311G(d,p)) (Hartree): -501.83626097

Electronic state : 3-A

Cartesian coordinates (Angs):

|   |          |           |          |
|---|----------|-----------|----------|
| C | 2.203907 | -0.230757 | 0.074233 |
|---|----------|-----------|----------|

|                                                           |           |           |           |
|-----------------------------------------------------------|-----------|-----------|-----------|
| C                                                         | 2.574238  | 0.984026  | -0.742954 |
| C                                                         | -3.020417 | -0.082262 | 0.049734  |
| C                                                         | -0.488176 | -0.280622 | 0.097358  |
| C                                                         | 0.810218  | 0.484244  | 0.332623  |
| C                                                         | 1.208298  | 1.597739  | -0.692335 |
| C                                                         | 3.038275  | -0.462756 | 1.342532  |
| C                                                         | 2.140929  | -1.527925 | -0.753929 |
| H                                                         | 3.486979  | 1.261841  | -1.258112 |
| H                                                         | -0.531277 | -1.154530 | 0.756076  |
| H                                                         | -0.525286 | -0.663494 | -0.926145 |
| H                                                         | 0.804844  | 0.892210  | 1.348638  |
| H                                                         | 0.649496  | 1.538718  | -1.639836 |
| H                                                         | 1.136465  | 2.634910  | -0.342948 |
| H                                                         | 3.113153  | 0.449832  | 1.939641  |
| H                                                         | 4.053994  | -0.780551 | 1.086832  |
| H                                                         | 2.590731  | -1.244438 | 1.966253  |
| H                                                         | 3.152300  | -1.835313 | -1.035903 |
| H                                                         | 1.567503  | -1.400163 | -1.674589 |
| H                                                         | 1.691554  | -2.345552 | -0.180842 |
| C                                                         | -1.719891 | 0.600493  | 0.348763  |
| H                                                         | -1.687955 | 1.501189  | -0.276383 |
| H                                                         | -1.762637 | 0.952421  | 1.384808  |
| O                                                         | -3.136942 | -1.139359 | -0.615938 |
| O                                                         | -4.141076 | 0.351838  | 0.430483  |
| Rotational constants (GHz): 2.4104300 0.4805500 0.4550400 |           |           |           |
| Vibrational harmonic frequencies (cm-1):                  |           |           |           |
| 14.1255                                                   | 46.9991   | 75.7451   |           |
| 85.8387                                                   | 102.3773  | 205.5536  |           |
| 211.9033                                                  | 225.8184  | 230.8629  |           |
| 269.1247                                                  | 282.7836  | 345.8931  |           |
| 395.3110                                                  | 431.8016  | 447.7841  |           |
| 513.7986                                                  | 552.1060  | 614.2830  |           |
| 628.0400                                                  | 761.7631  | 787.5027  |           |
| 869.7776                                                  | 878.1388  | 901.3784  |           |
| 919.3830                                                  | 944.3437  | 949.9367  |           |
| 995.1115                                                  | 1001.1770 | 1011.9589 |           |
| 1047.5598                                                 | 1096.7157 | 1103.3634 |           |
| 1119.2180                                                 | 1161.7324 | 1191.0480 |           |
| 1210.6921                                                 | 1219.8665 | 1249.9651 |           |
| 1266.3293                                                 | 1279.6282 | 1309.1090 |           |
| 1327.2302                                                 | 1364.3247 | 1391.5611 |           |
| 1397.1464                                                 | 1414.6711 | 1455.1125 |           |
| 1464.7560                                                 | 1483.0717 | 1488.4925 |           |
| 1496.5237                                                 | 1504.8940 | 1509.6494 |           |
| 1580.7930                                                 | 2951.6267 | 3009.0359 |           |
| 3011.4695                                                 | 3019.6581 | 3025.2730 |           |
| 3032.9429                                                 | 3036.1355 | 3060.0146 |           |
| 3072.5964                                                 | 3080.1046 | 3081.9552 |           |
| 3088.0543                                                 | 3098.1658 | 3174.9682 |           |
| Zero-point correction (Hartree): 0.208626                 |           |           |           |

**Int2-T-B3LYP**

-----

E(UB+HF-LYP/6-311G(d,p)) (Hartree): -501.83418052

Electronic state : 3-A

Cartesian coordinates (Angs):

|   |           |           |           |
|---|-----------|-----------|-----------|
| C | -0.198450 | 0.895428  | 0.085011  |
| C | 0.855991  | 0.094641  | -0.792542 |
| C | 2.025896  | -0.495882 | -0.087660 |
| C | -2.680468 | -0.191450 | -0.230557 |
| C | -1.306723 | 0.217754  | -0.802518 |
| C | -0.279757 | -0.852250 | -1.250861 |
| C | -0.099831 | 2.414567  | -0.025848 |
| C | -0.201296 | 0.465302  | 1.554075  |
| H | 1.227844  | 0.731314  | -1.599120 |
| H | -3.313076 | -0.435763 | -1.100833 |
| H | -3.142134 | 0.691399  | 0.225095  |

|                                                           |           |           |           |
|-----------------------------------------------------------|-----------|-----------|-----------|
| H                                                         | -1.496465 | 0.891287  | -1.645556 |
| H                                                         | -0.311597 | -1.749481 | -0.631202 |
| H                                                         | -0.277642 | -1.148376 | -2.300675 |
| H                                                         | -0.082017 | 2.739555  | -1.070045 |
| H                                                         | 0.808169  | 2.785213  | 0.459845  |
| H                                                         | -0.955797 | 2.893492  | 0.460935  |
| H                                                         | 0.705638  | 0.818459  | 2.054750  |
| H                                                         | -0.253014 | -0.617724 | 1.675034  |
| H                                                         | -1.058788 | 0.900369  | 2.074406  |
| C                                                         | -2.712109 | -1.336793 | 0.722031  |
| H                                                         | -3.183727 | -1.252684 | 1.692246  |
| H                                                         | -2.342705 | -2.312124 | 0.429163  |
| O                                                         | 2.065441  | -1.661717 | 0.379830  |
| O                                                         | 3.091533  | 0.136363  | 0.151317  |
| Rotational constants (GHz): 1.6803200 0.8147500 0.7031000 |           |           |           |
| Vibrational harmonic frequencies (cm-1):                  |           |           |           |
| 40.9021                                                   | 56.6592   | 74.2378   |           |
| 102.5742                                                  | 134.5768  | 182.8691  |           |
| 206.3813                                                  | 236.1376  | 256.0970  |           |
| 271.2526                                                  | 291.6744  | 341.9077  |           |
| 363.4106                                                  | 415.3983  | 440.6729  |           |
| 485.7237                                                  | 583.0850  | 600.2344  |           |
| 614.5298                                                  | 666.9306  | 731.2974  |           |
| 789.2331                                                  | 795.6917  | 896.6655  |           |
| 918.6789                                                  | 957.4362  | 963.0032  |           |
| 969.6041                                                  | 992.0307  | 1006.8887 |           |
| 1039.4208                                                 | 1092.7816 | 1124.2564 |           |
| 1124.8670                                                 | 1144.0908 | 1169.2690 |           |
| 1185.7344                                                 | 1219.0788 | 1245.6464 |           |
| 1255.4828                                                 | 1279.6579 | 1305.1619 |           |
| 1330.6763                                                 | 1349.2120 | 1393.2650 |           |
| 1406.9923                                                 | 1429.2918 | 1460.8227 |           |
| 1475.3757                                                 | 1482.5361 | 1492.1204 |           |
| 1496.8798                                                 | 1505.3024 | 1510.4455 |           |
| 1573.5080                                                 | 2934.5257 | 3015.5126 |           |
| 3023.8681                                                 | 3029.0027 | 3039.9877 |           |
| 3065.0610                                                 | 3068.0777 | 3077.7212 |           |
| 3085.6115                                                 | 3087.8459 | 3111.1107 |           |
| 3117.1627                                                 | 3142.9027 | 3242.7057 |           |
| Zero-point correction (Hartree): 0.208495                 |           |           |           |

**HC-Triplet biradical (formed by CO<sub>2</sub>-loss)**

-----

E(UB+HF-LYP/CBSB7) (Hartree): -313.21375644

Electronic state : 3-A

Cartesian coordinates (Angs):

|   |           |           |           |
|---|-----------|-----------|-----------|
| C | 0.910290  | -0.186806 | -0.070063 |
| C | 0.999025  | 1.097414  | -0.859130 |
| C | -1.654262 | -0.265143 | 0.858282  |
| C | -0.314295 | 0.477542  | 0.696145  |
| C | -0.226813 | 1.713867  | -0.258452 |
| C | 2.117198  | -0.476219 | 0.838721  |
| C | 0.599775  | -1.430858 | -0.919745 |
| H | 1.711240  | 1.446312  | -1.599095 |
| H | -2.268243 | 0.350897  | 1.540654  |
| H | -1.474481 | -1.198073 | 1.404970  |
| H | 0.017939  | 0.761390  | 1.698748  |
| H | -1.073208 | 1.818701  | -0.951189 |
| H | -0.103335 | 2.685574  | 0.237106  |
| H | 2.379100  | 0.396611  | 1.442710  |
| H | 2.994974  | -0.748581 | 0.243829  |
| H | 1.900961  | -1.309112 | 1.517202  |
| H | 1.466413  | -1.681883 | -1.539925 |
| H | -0.254718 | -1.270481 | -1.579539 |
| H | 0.381231  | -2.297078 | -0.285709 |
| C | -2.443770 | -0.546136 | -0.373567 |
| H | -2.629894 | 0.227752  | -1.108175 |



|                                          |           |           |           |  |
|------------------------------------------|-----------|-----------|-----------|--|
| H                                        | -2.970864 | -1.483999 | -0.494730 |  |
| Rotational constants (GHz):              | 2.8034400 | 1.6795800 | 1.4505300 |  |
| Vibrational harmonic frequencies (cm-1): |           |           |           |  |
| 34.3086                                  | 84.2963   |           | 123.9875  |  |
| 196.7739                                 | 207.9397  |           | 222.2900  |  |
| 245.7376                                 | 280.4356  |           | 286.3546  |  |
| 351.2852                                 | 402.7990  |           | 420.3797  |  |
| 476.6029                                 | 575.4651  |           | 622.1074  |  |
| 689.9885                                 | 793.0344  |           | 869.8238  |  |
| 888.0040                                 | 917.4725  |           | 941.4217  |  |
| 948.3548                                 | 961.4386  |           | 998.9988  |  |
| 1010.2575                                | 1047.2394 |           | 1117.7318 |  |
| 1120.8041                                | 1147.3674 |           | 1189.4319 |  |
| 1209.7012                                | 1235.4482 |           | 1255.6995 |  |
| 1271.3052                                | 1313.1759 |           | 1334.5691 |  |
| 1381.2704                                | 1389.4684 |           | 1412.3369 |  |
| 1454.7852                                | 1462.4920 |           | 1472.2952 |  |
| 1482.1053                                | 1484.8149 |           | 1500.4631 |  |
| 1505.8434                                | 2908.1839 |           | 2978.5366 |  |
| 2999.6722                                | 3007.4012 |           | 3013.5218 |  |
| 3030.0623                                | 3044.9688 |           | 3066.7097 |  |
| 3073.2328                                | 3085.1303 |           | 3098.9601 |  |
| 3141.3648                                | 3168.8803 |           | 3239.1662 |  |
| Zero-point correction (Hartree):         | 0.191807  |           |           |  |

**TS1-T**

-----

E(UB+HF-LYP/6-311G(d,p)) (Hartree): -501.80195205

Electronic state : 3-A

Cartesian coordinates (Angs):

|                                          |           |           |           |  |
|------------------------------------------|-----------|-----------|-----------|--|
| C                                        | 1.260443  | -0.286411 | 0.060886  |  |
| C                                        | 0.126309  | -0.340874 | -0.982696 |  |
| C                                        | -1.475454 | -0.407506 | -0.111450 |  |
| C                                        | -0.167400 | 1.544164  | 1.151169  |  |
| C                                        | 0.946146  | 1.252787  | 0.137876  |  |
| C                                        | 0.342052  | 1.139416  | -1.295364 |  |
| C                                        | 2.609660  | -0.558523 | -0.643380 |  |
| C                                        | 1.212872  | -1.135380 | 1.331307  |  |
| H                                        | 0.005516  | -1.131962 | -1.717802 |  |
| H                                        | -0.321793 | 2.625134  | 1.221052  |  |
| H                                        | 0.145664  | 1.215899  | 2.145662  |  |
| H                                        | 1.802775  | 1.915980  | 0.280767  |  |
| H                                        | -0.528465 | 1.745829  | -1.546504 |  |
| H                                        | 1.082122  | 1.271705  | -2.087440 |  |
| H                                        | 2.749255  | 0.033800  | -1.548834 |  |
| H                                        | 2.692524  | -1.614631 | -0.914428 |  |
| H                                        | 3.429766  | -0.321980 | 0.041343  |  |
| H                                        | 1.316069  | -2.194475 | 1.081684  |  |
| H                                        | 0.282940  | -1.028715 | 1.887479  |  |
| H                                        | 2.043385  | -0.862843 | 1.990936  |  |
| C                                        | -1.512453 | 0.892873  | 0.752397  |  |
| H                                        | -2.099055 | 1.593065  | 0.155126  |  |
| H                                        | -2.106314 | 0.646095  | 1.634794  |  |
| O                                        | -2.328500 | -0.480249 | -1.102818 |  |
| O                                        | -1.489931 | -1.581773 | 0.474280  |  |
| Rotational constants (GHz):              | 1.6608200 | 1.0348900 | 0.9658900 |  |
| Vibrational harmonic frequencies (cm-1): |           |           |           |  |
| -251.2379                                | 109.5291  |           | 165.6759  |  |
| 191.1810                                 | 206.1388  |           | 225.7555  |  |
| 243.4690                                 | 307.2399  |           | 319.9489  |  |
| 378.8781                                 | 388.9698  |           | 408.9736  |  |
| 432.9095                                 | 447.2231  |           | 502.3071  |  |
| 542.0579                                 | 615.2251  |           | 665.9008  |  |
| 730.6222                                 | 795.7466  |           | 816.2776  |  |
| 862.9985                                 | 872.1026  |           | 906.2169  |  |
| 947.3432                                 | 951.4062  |           | 965.2519  |  |
| 966.7346                                 | 1004.6323 |           | 1014.3969 |  |

|           |           |           |
|-----------|-----------|-----------|
| 1021.6513 | 1066.7689 | 1101.5548 |
| 1115.6786 | 1144.9477 | 1176.0405 |
| 1205.3754 | 1219.4345 | 1231.1897 |
| 1236.4211 | 1250.0308 | 1273.1911 |
| 1297.3293 | 1324.7427 | 1340.6896 |
| 1372.0477 | 1399.6105 | 1427.4721 |
| 1469.9623 | 1481.7887 | 1485.2568 |
| 1496.7813 | 1504.4401 | 1507.4570 |
| 1518.8822 | 3025.2598 | 3030.7663 |
| 3036.3706 | 3057.7870 | 3058.9478 |
| 3067.2105 | 3069.4412 | 3085.0162 |
| 3091.2214 | 3102.6320 | 3109.2294 |
| 3112.6858 | 3128.1771 | 3146.7344 |

Zero-point correction (Hartree): 0.211358

**TS2-T**

-----

E(UB+HF-LYP/6-311G(d,p)) (Hartree): -501.80077577

Electronic state : 3-A

Cartesian coordinates (Angs):

|   |           |           |           |
|---|-----------|-----------|-----------|
| C | 1.249535  | -0.290661 | 0.062272  |
| C | 0.048407  | -0.400423 | -0.933366 |
| C | -1.333605 | -0.535163 | -0.246059 |
| C | -0.118875 | 1.623511  | 1.079695  |
| C | 0.961788  | 1.251675  | 0.050783  |
| C | 0.314496  | 1.066717  | -1.350211 |
| C | 2.573981  | -0.619653 | -0.646363 |
| C | 1.221304  | -1.044996 | 1.393674  |
| H | 0.086741  | -1.182192 | -1.695891 |
| H | -0.283076 | 2.707310  | 1.037650  |
| H | 0.234197  | 1.390248  | 2.086803  |
| H | 1.824058  | 1.916840  | 0.142285  |
| H | -0.551887 | 1.680283  | -1.603789 |
| H | 1.034180  | 1.141450  | -2.163469 |
| H | 2.687536  | -0.106548 | -1.603020 |
| H | 2.646109  | -1.694956 | -0.834963 |
| H | 3.420529  | -0.334970 | -0.013725 |
| H | 1.304441  | -2.121255 | 1.221930  |
| H | 0.310841  | -0.888414 | 1.971372  |
| H | 2.072568  | -0.739150 | 2.011973  |
| C | -1.464139 | 0.958402  | 0.817870  |
| H | -2.140650 | 1.547480  | 0.206640  |
| H | -1.977725 | 0.546800  | 1.680562  |
| O | -2.390964 | -0.417851 | -1.014472 |
| O | -1.532188 | -1.572072 | 0.537706  |

Rotational constants (GHz): 1.6476600 1.0392600 0.9692500

Vibrational harmonic frequencies (cm-1):

|           |           |           |
|-----------|-----------|-----------|
| -392.8672 | 79.6401   | 152.8526  |
| 191.9837  | 204.4485  | 222.0839  |
| 255.4714  | 292.4518  | 323.5006  |
| 339.4992  | 377.9445  | 407.6771  |
| 420.1491  | 473.3615  | 513.5951  |
| 560.2718  | 582.4540  | 656.3443  |
| 693.8678  | 748.8577  | 819.0328  |
| 840.2199  | 879.9809  | 907.0083  |
| 935.4665  | 956.6030  | 958.6393  |
| 978.5780  | 1008.5320 | 1021.3276 |
| 1047.9305 | 1080.5938 | 1088.4624 |
| 1129.4403 | 1133.8629 | 1168.2857 |
| 1188.8200 | 1215.1968 | 1227.9642 |
| 1233.9338 | 1253.3779 | 1267.7634 |
| 1283.0283 | 1295.0545 | 1323.0308 |
| 1363.8799 | 1404.3864 | 1429.5444 |
| 1469.4363 | 1482.8721 | 1488.1248 |
| 1497.8385 | 1505.5908 | 1512.8416 |
| 1516.1928 | 3010.8260 | 3021.5363 |
| 3026.6694 | 3058.2374 | 3065.1973 |

|           |           |           |
|-----------|-----------|-----------|
| 3072.0614 | 3074.1781 | 3079.7173 |
| 3086.5445 | 3102.0926 | 3118.1238 |
| 3119.2166 | 3124.5397 | 3195.6703 |

Zero-point correction (Hartree): 0.210876

**TS3-T**

-----  
E(UB+HF-LYP/6-311G(d,p)) (Hartree): -501.83030852  
Electronic state : 3-A  
Cartesian coordinates (Angs):

|   |           |           |           |
|---|-----------|-----------|-----------|
| C | -2.182820 | 0.230613  | 0.091365  |
| C | -2.541368 | -0.925191 | -0.812059 |
| C | 3.021272  | 0.138564  | -0.034799 |
| C | 0.504598  | 0.282875  | 0.148522  |
| C | -0.790780 | -0.506334 | 0.317088  |
| C | -1.176270 | -1.541615 | -0.789539 |
| C | -3.030331 | 0.375678  | 1.363228  |
| C | -2.108742 | 1.581278  | -0.644603 |
| H | -3.445723 | -1.160357 | -1.362228 |
| H | 0.535610  | 1.109044  | 0.866895  |
| H | 0.569163  | 0.726087  | -0.847000 |
| H | -0.799602 | -0.983129 | 1.302178  |
| H | -0.605979 | -1.413499 | -1.722862 |
| H | -1.108462 | -2.601312 | -0.515065 |
| H | -3.111480 | -0.574906 | 1.896655  |
| H | -4.043214 | 0.710011  | 1.117342  |
| H | -2.591093 | 1.114191  | 2.042926  |
| H | -3.116695 | 1.907465  | -0.917706 |
| H | -1.522778 | 1.517889  | -1.563872 |
| H | -1.667917 | 2.357154  | -0.010192 |
| C | 1.733376  | -0.615125 | 0.357602  |
| H | 1.701982  | -1.493552 | -0.296452 |
| H | 1.793181  | -0.980528 | 1.386191  |
| O | 3.136608  | 0.896150  | -0.969262 |
| O | 3.968317  | -0.191027 | 0.799558  |

Rotational constants (GHz): 2.3307700 0.4854300 0.4721000  
Vibrational harmonic frequencies (cm-1):

|           |           |           |
|-----------|-----------|-----------|
| -630.6736 | 30.0547   | 46.2531   |
| 83.1881   | 88.2734   | 102.3905  |
| 207.2773  | 226.3869  | 229.5602  |
| 229.7682  | 269.5239  | 287.9680  |
| 345.6740  | 395.4328  | 434.9298  |
| 453.1688  | 504.6992  | 616.8060  |
| 651.5041  | 709.3035  | 761.6818  |
| 803.2848  | 868.3544  | 884.3547  |
| 900.1673  | 941.0892  | 947.9769  |
| 991.2009  | 993.9737  | 999.8006  |
| 1026.8146 | 1049.5954 | 1092.3797 |
| 1107.5162 | 1184.9766 | 1185.1842 |
| 1210.4164 | 1211.3166 | 1248.7748 |
| 1261.3939 | 1266.5644 | 1303.5842 |
| 1319.6922 | 1345.1405 | 1376.5975 |
| 1391.6960 | 1412.8921 | 1457.6875 |
| 1466.5870 | 1481.8943 | 1487.2826 |
| 1496.4795 | 1503.5538 | 1509.1514 |
| 1662.0152 | 2956.3006 | 3009.8991 |
| 3011.6620 | 3019.0661 | 3028.6424 |
| 3038.0530 | 3038.8692 | 3072.5731 |
| 3075.8407 | 3080.5100 | 3088.3421 |
| 3095.7972 | 3104.1589 | 3173.7307 |

Zero-point correction (Hartree): 0.206987

**TS4-T**

-----  
E(UB+HF-LYP/6-311G(d,p)) (Hartree): -501.82910222  
Electronic state : 3-A

Cartesian coordinates (Angs):

|   |           |           |           |
|---|-----------|-----------|-----------|
| C | -0.157980 | 0.894898  | 0.151613  |
| C | 0.902263  | 0.111870  | -0.720712 |
| C | 1.989754  | -0.624333 | 0.004111  |
| C | -2.632498 | -0.143967 | -0.327155 |
| C | -1.235227 | 0.278338  | -0.825515 |
| C | -0.220155 | -0.792854 | -1.299695 |
| C | -0.016594 | 2.413076  | 0.095689  |
| C | -0.257549 | 0.420057  | 1.601699  |
| H | 1.308145  | 0.781555  | -1.481023 |
| H | -3.227979 | -0.350742 | -1.234240 |
| H | -3.109461 | 0.726775  | 0.136655  |
| H | -1.380009 | 1.001323  | -1.634853 |
| H | -0.280081 | -1.721922 | -0.734669 |
| H | -0.167916 | -1.009609 | -2.366674 |
| H | 0.050067  | 2.773960  | -0.934624 |
| H | 0.883209  | 2.739198  | 0.626889  |
| H | -0.875248 | 2.899909  | 0.569166  |
| H | 0.618388  | 0.751803  | 2.168003  |
| H | -0.318287 | -0.663968 | 1.687765  |
| H | -1.141624 | 0.853441  | 2.077275  |
| C | -2.713371 | -1.319178 | 0.584880  |
| H | -3.352617 | -1.304182 | 1.457810  |
| H | -2.232238 | -2.255981 | 0.333451  |
| O | 1.845889  | -1.673985 | 0.589872  |
| O | 3.063335  | 0.092860  | -0.122425 |

Rotational constants (GHz): 1.6581600 0.8399900 0.7266200

Vibrational harmonic frequencies (cm-1):

|           |           |           |
|-----------|-----------|-----------|
| -232.8128 | 44.4081   | 55.6947   |
| 77.0248   | 108.4212  | 156.8256  |
| 184.9734  | 212.1104  | 237.8513  |
| 266.9460  | 276.0954  | 301.0647  |
| 357.7276  | 370.9774  | 441.0016  |
| 475.7520  | 512.2835  | 589.0794  |
| 602.3814  | 652.8732  | 723.2518  |
| 767.9736  | 794.5405  | 835.8662  |
| 883.4154  | 929.6608  | 951.7724  |
| 958.5210  | 975.0802  | 1003.1900 |
| 1010.6937 | 1068.5501 | 1099.7841 |
| 1123.9395 | 1136.2709 | 1169.0923 |
| 1178.2335 | 1217.2332 | 1241.7169 |
| 1245.3143 | 1267.8729 | 1304.1564 |
| 1308.4601 | 1341.3913 | 1391.2380 |
| 1406.9501 | 1428.9570 | 1457.7691 |
| 1472.2742 | 1481.1921 | 1490.3183 |
| 1495.0815 | 1503.3451 | 1509.6522 |
| 1718.4473 | 2918.6607 | 3015.7316 |
| 3028.7100 | 3030.4857 | 3037.1279 |
| 3070.0104 | 3077.5341 | 3078.0082 |
| 3084.6568 | 3085.4245 | 3131.9904 |
| 3138.8528 | 3147.3739 | 3246.5281 |

Zero-point correction (Hartree): 0.207099
